# Supplementary material for: Assessment of Drug-Induced Liver Injury through Cell Morphology and Gene Expression Analysis
Source: PubMed Central journal article supplement — Chem Res Toxicol. 2023 Aug 31;36(9):1456–70. doi: 10.1021/acs.chemrestox.2c00381 (PMC10523580; doi:10.1021/acs.chemrestox.2c00381), 2023-08-31
Supplement: tx2c00381_si_001.pdf [file tx2c00381_si_001.pdf]

## Supporting Information

### Assessment of Drug-Induced Liver Injury through cell morphology and gene expression analysis.

*Vanille Lejal<sup>1</sup>, Natacha Cerisier<sup>1</sup>, David Rouquie<sup>2,3</sup>, Olivier Taboureau<sup>1\*</sup>*

<sup>1</sup> Université Paris Cité, Inserm U1133, CNRS UMR 8251, Paris, France.

<sup>2</sup> Bayer SAS, Bayer Crop Science, 355 rue Dostoïevski, CS 90153, 06906, Valbonne Sophia-Antipolis, France.

<sup>3</sup> Université Côte d'Azur 3IA Interdisciplinary Institute in Artificial Intelligence, France.

# Table of Contents

|                                                                                                                                                                                                                                                                                                                                                                              |    |
|------------------------------------------------------------------------------------------------------------------------------------------------------------------------------------------------------------------------------------------------------------------------------------------------------------------------------------------------------------------------------|----|
| <b>Table of Contents</b> .....                                                                                                                                                                                                                                                                                                                                               | 2  |
| <b>Supplementary Figures</b> .....                                                                                                                                                                                                                                                                                                                                           | 5  |
| <b>Supplementary S1.</b> Remaining pathway analysis of Cell-Painting features-based clusters of hepatotoxic compounds from the CP_DILIs_pos_neg dataset, and heatmaps and pathway analysis related to Cell-Painting features-based clusters of hepatotoxic compounds from the CP_DILIs_most_neg, CP_eTox_H_HT, CP_eTox_H_MF, CP_eTox_H_MFHB and CP_eTox_H_MFHC datasets..... | 5  |
| <b>Figure S1.</b> Heatmaps of pathways significantly deregulated by the Cell-Painting features-based clusters of hepatotoxic compounds from the CP_DILIs_most_neg dataset.....                                                                                                                                                                                               | 8  |
| <b>Figure S2.</b> Heatmaps of pathways significantly deregulated by the Cell-Painting features-based clusters of hepatotoxic compounds from the CP_eTox_H_HT dataset.....                                                                                                                                                                                                    | 12 |
| <b>Figure S3.</b> Heatmaps of pathways significantly deregulated by the Cell-Painting features-based clusters of hepatotoxic compounds from the CP_eTox_H_MF dataset.....                                                                                                                                                                                                    | 15 |
| <b>Figure S4.</b> Heatmaps of pathways significantly deregulated by the Cell-Painting features-based clusters of hepatotoxic compounds from the CP_eTox_H_MFHB dataset.....                                                                                                                                                                                                  | 18 |
| <b>Figure S5.</b> Heatmaps of pathways significantly deregulated by the Cell-Painting features-based clusters of hepatotoxic compounds from the CP_eTox_H_MFHC dataset.....                                                                                                                                                                                                  | 21 |
| <b>Supplementary S2.</b> Analysis of permutation tests for CP_DILIs_pos_neg, CP_DILIs_most_neg, CP_eTox_H_HT, CP_eTox_H_MF, CP_eTox_H_MFHB, and CP_eTox_H_MFHC.....                                                                                                                                                                                                          | 24 |
| <b>Figure S6.</b> Histograms of validation set balanced accuracies obtained during the permutation tests with each best model according to CP_DILIs_pos_neg, CP_DILIs_most_neg, CP_eTox_H_HT, CP_eTox_H_MF, CP_eTox_H_MFHB and CP_eTox_H_MFHC datasets.....                                                                                                                  | 24 |
| <b>Supplementary S3.</b> Heatmaps related to pathway analysis of the randomly created clusters from the hepatotoxic compounds of the CP_DILIs_pos_neg, CP_DILIs_most_neg, CP_eTox_H_HT, CP_eTox_H_MF, CP_eTox_H_MFHB and CP_eTox_H_MFHC datasets.....                                                                                                                        | 27 |
| <b>Figure S7.</b> Heatmaps of pathways significantly deregulated by the randomly created clusters of hepatotoxic compounds from the CP_DILIs_pos_neg dataset.....                                                                                                                                                                                                            | 27 |

|                                                                                                                                                                                    |     |
|------------------------------------------------------------------------------------------------------------------------------------------------------------------------------------|-----|
| <b>Figure S8.</b> Heatmaps of pathways significantly deregulated by the randomly created clusters of hepatotoxic compounds from the CP_DILIs_most_neg dataset.....                 | 30  |
| <b>Figure S9.</b> Heatmaps of pathways significantly deregulated by the randomly created clusters of hepatotoxic compounds from the CP_eTox_H_HT dataset.....                      | 32  |
| <b>Figure S10.</b> Heatmaps of pathways significantly deregulated by the randomly created clusters of hepatotoxic compounds from the CP_eTox_H_MF dataset.....                     | 35  |
| <b>Figure S11.</b> Heatmaps of pathways significantly deregulated by the randomly created clusters of hepatotoxic compounds from the CP_eTox_H_MFHB dataset.....                   | 38  |
| <b>Figure S12.</b> Heatmaps of pathways significantly deregulated by the randomly created clusters of hepatotoxic compounds from the CP_eTox_H_MFHC dataset.....                   | 41  |
| <b>Supplementary Tables</b> .....                                                                                                                                                  | 44  |
| <b>Table S1.</b> DILrank and eTox compounds annotations (see XLSX file).....                                                                                                       | 44  |
| <b>Table S2.</b> Details of model parameters.....                                                                                                                                  | 44  |
| <b>Table S3.</b> Metrics formulas.....                                                                                                                                             | 45  |
| <b>Table S4.</b> Lists of selected features after feature selection.....                                                                                                           | 45  |
| <b>Table S5.</b> Percentages of feature categories in each compartment and dataset before feature selection.....                                                                   | 65  |
| <b>Table S6.</b> Percentages of feature categories in each compartment and dataset after feature selection.....                                                                    | 65  |
| <b>Table S7.</b> Ratio of percentage in the selected features relative to the background percentage in the full set of features before selection.....                              | 66  |
| <b>Table S8.</b> P-values of the Fisher's Exact Test between the number of features before and after selection, for each compartment, feature category and dataset.....            | 66  |
| <b>Table S9.</b> Cell Painting features-based clusters details and gene enrichment results.....                                                                                    | 67  |
| <b>Table S10.</b> Details of the number of Cell Painting features based clusters and their mean size.....                                                                          | 111 |
| <b>Table S11.</b> Comparison of machine learning models for hepatotoxicity prediction based on Cell Painting features.....                                                         | 112 |
| <b>Table S12.</b> Percentage of balanced accuracies higher after training and prediction on a permuted dataset than after training and prediction on the non-permuted dataset..... | 115 |
| <b>Table S13.</b> Machine learning models performance for hepatotoxicity                                                                                                           |     |

|                                                                                                                           |     |
|---------------------------------------------------------------------------------------------------------------------------|-----|
| prediction based on Cell Painting features with Recursive Feature Elimination (RFE) included in the loop of training..... | 116 |
| <b>Table S14.</b> Randomly created cluster details and gene enrichment results.....                                       | 118 |
| <b>REFERENCES</b> .....                                                                                                   | 178 |

## Supplementary Figures

**Supplementary S1.** Remaining pathway analysis of Cell-Painting features-based clusters of hepatotoxic compounds from the CP\_DILIs\_pos\_neg dataset, and heatmaps and pathway analysis related to Cell-Painting features-based clusters of hepatotoxic compounds from the CP\_DILIs\_most\_neg, CP\_eTox\_H\_HT, CP\_eTox\_H\_MF, CP\_eTox\_H\_MFHB and CP\_eTox\_H\_MFHC datasets.

### - *CP\_DILIs\_pos\_neg dataset*

Our analysis highlighted supplementary functional signaling pathways that could be related to hepatic injury. One of them deals with carbohydrate homeostasis. We noticed that hepatotoxic compounds of 39 affected gene expression coding associated with the apelin signaling pathway (Figure 6A). Apelin is a peptide that forms a ligand-receptor complex with the APJ receptor. Although the Apelin/APJ system plays a role in cardiac disease, in glycometabolism and fat metabolism and more generally in diabetic complications, it can contribute also in the liver to favor hepatic fibrosis and cirrhosis through an increased Fas production and apoptosis<sup>1</sup>. In addition, clusters 26 and 55 both had an impact on genes coding for proteins of the AGE-RAGE signaling pathway in diabetic complications. The coexistence of type 2 diabetes mellitus and Nonalcoholic Fatty Liver Disease (NAFLD) is known to be frequently observed<sup>2,3</sup>. Finally, Gene Ontology enrichment mentioned that clusters 23, 48 and 55 all had consequences on gene expression related to fat accumulation and sterol biosynthesis (Figure 6B) that are directly connected to steatosis and NAFLD too<sup>4,5</sup>.

We already mentioned the perturbation of genes associated with hyperoxia, but a supplementary term related to the regulation of the oxygen levels concerning Hypoxia Inducible Factor 1 (HIF-1) was identified for hepatotoxic compounds of cluster 13 (Figure

6B). HIF-1 is a transcription factor that is activated in case of perturbations of the oxygen level in a cell. Studies of this compound and its mechanisms showed its implication in different types of liver injuries such as cirrhosis or liver cancer<sup>6,7</sup>. Moreover, mitochondrial cytochrome c, a marker of drug-induced hepatotoxicity<sup>8</sup>, appeared to be a targeted area of hepatotoxic drugs of cluster 39 (Figure 6B).

Genes involved in the ER protein processing and more precisely in the ubiquitin proteasome pathway also were also mentioned as significantly differentially expressed by DILI compounds of cluster 55 (Figure 6B). The ubiquitin-proteasome complex has already been reported to be involved in liver injuries such as fibrosis or chronic liver diseases<sup>9,10</sup>.

Hepatotoxic compounds of clusters 13, 16, 23, 26 and 55 lead to the differential expression of genes that are all involved in the regulation of the immune response and kinase activity (Figure 6B), which could hypothetically be linked to liver injuries. For example, the IL-17 signaling pathway is an actor of the immune response and development of DILI<sup>11,12</sup>. IL-17 can mediate the inflammatory and immune response through the activation of the MAPK cascade and the activation of NF $\kappa$ B<sup>13</sup>. Protein kinase activity is modified by clusters 23, 26 and 55 (Figure 6B), and NF $\kappa$ B, known for regulating immune response and for its implication in the development of hepatic inflammation, fibrosis or HCC<sup>14</sup>, could be a stage in the development of liver injury resulting from a reaction of the immune system. Still regarding the protein kinase activity, we saw that ERB signaling pathway, also known as epidermal growth factor receptor (EGFR) signaling pathway, can be a key actor in inflammatory response and liver disease development<sup>15</sup>. Then, it has already been proved that phagocytosis, a mechanism of the immune response that is a deregulated pathway according to our enrichment analysis, can contribute to the progression of liver diseases<sup>16</sup>.

Regarding the cellular compartments affected by the clusters of DILIs compounds, we noticed that genes related to spindle fibers organization and their role in mitosis were differentially expressed by clusters 30 and 55 (Figure 6B and 6C). Spindle fibers are part of the cytoskeleton and contribute to separating the chromosomes into two different cells during nuclear division, including mitosis. As already mentioned before, mitotic errors due to defaults during the separation of the genetic information of a cell can lead to liver fibrosis and hepatocellular carcinoma (HCC)<sup>17</sup>.

The pathway analysis highlighted another loop of biological pathways that can end in liver fibrosis. Hepatotoxic compounds of cluster 17 acted on the expression of genes involved in response to hyperoxia and transforming growth factor beta (TGF $\beta$ ) (Figure 6B). Lee S. et al. demonstrated that hyperoxia can generate an overexpression of TGF $\beta$  that can participate in the development of liver fibrosis<sup>18</sup>. More specifically, TGF $\beta$  can be at the origin of an inhibition of hepatocyte proliferation leading to the stop of liver growth and regeneration<sup>19</sup>, which are BP that figured among those which were disrupted by the clusters 13, 41, 42, and 55 (Figure 6B).

Finally, according to the figure 6A, compounds of cluster 42 distorted the pathway affecting the role of proteoglycans in cancer, which could potentially include liver cancer<sup>20</sup>.

- *CP\_DILIs\_most\_neg\_dataset*

**Figure S1.** Heatmaps of pathways significantly deregulated by the Cell-Painting features-based clusters of hepatotoxic compounds from the CP\_DILIs\_most\_neg dataset. A. KEGG pathway analysis. B. GO BP pathway analysis. C. GO CC pathway analysis. Color scale is related to p-value. P-values equal or above 0.05 are in light green to white colors.

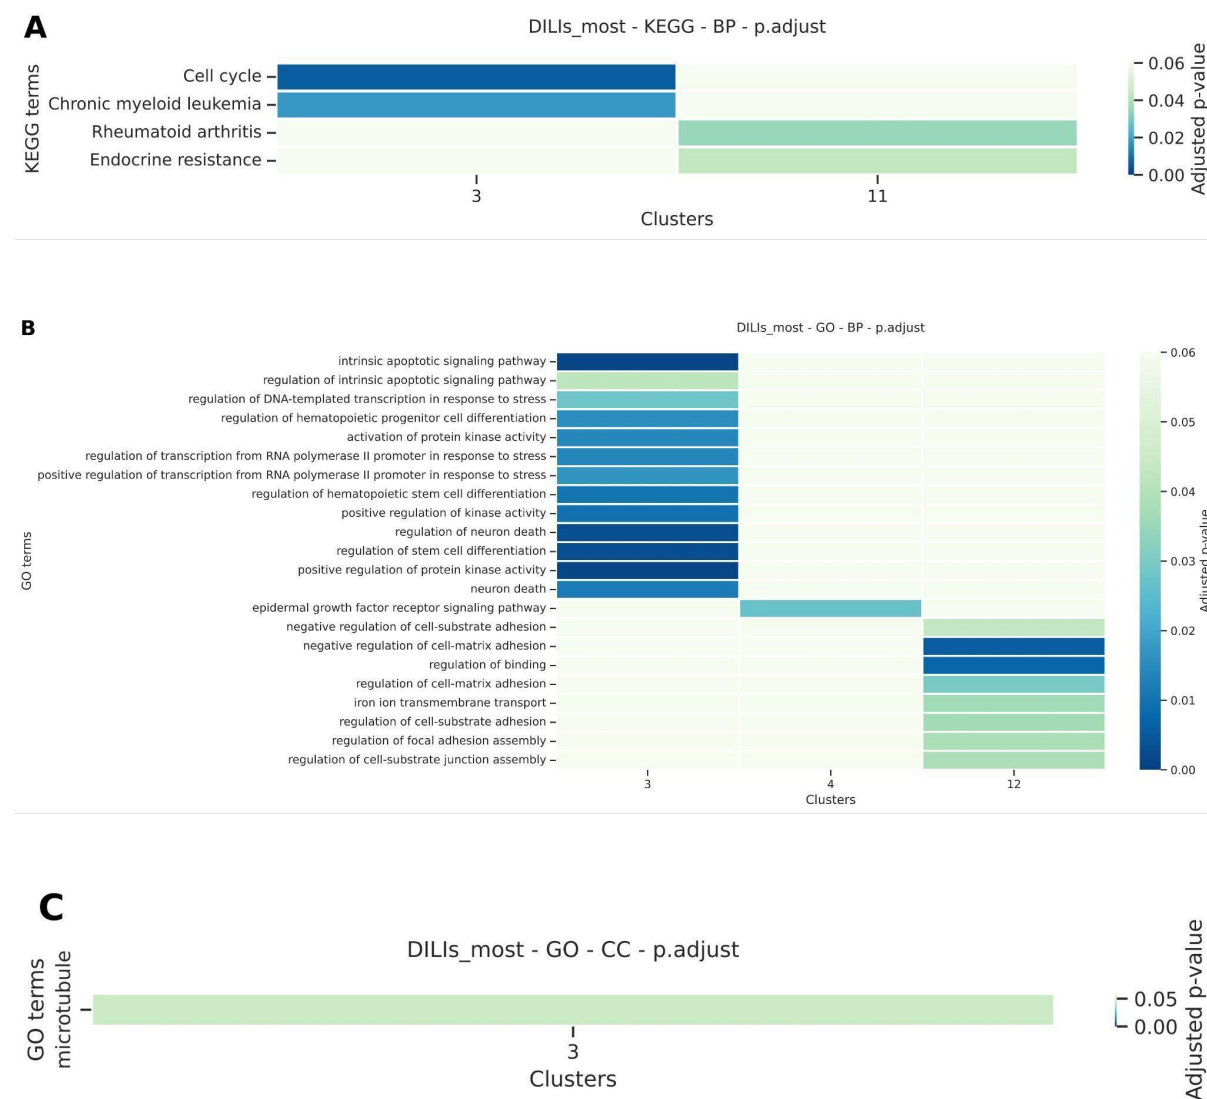

Among the 6 usable clusters of the CP\_DILIs\_most\_neg dataset, only 4 clusters have enough chemicals with transcriptomics data to perform pathway enrichment analysis. Results of this dataset were very close to the observations we described with the CP\_DILIs\_pos\_neg dataset in the manuscript. Significant perturbations on cell cycle, apoptosis, regulation of the kinase activity and immune response and microtubules organization (Figure S1) were obtained.



However, interesting supplementary pathways concerning the extracellular matrix (ECM) and cell-cell adhesion appeared in our analysis (Figure S1B). For example, cluster 12 affected negative regulation of focal adhesion, cell-substrate adhesion, regulation of binding and cell-matrix adhesion. Changes in extracellular properties such as thickening and association with deregulation of hepatic stellate cells were observed in case of liver fibrosis<sup>21</sup>. Cell adhesion molecules are generally very activated too in case of tissue inflammation and mediate the immune system response during the appearance of hepatic fibrosis<sup>22</sup>. Moreover, it has been demonstrated that an overactivation of ECM-producing cells trigger an overexpression of the ERBB receptors (mentioned before) leading to fibrosis<sup>15</sup>.

**- *CP\_eTox\_H\_HT dataset***

Lots of biological pathways highlighted by the enrichment and pathway analysis of the CP\_DILIs\_eTox\_H\_HT dataset were similar with those obtained with the two DILrank datasets and thus, already detailed. Among them, we can cite the cell cycle, the p53-mediated apoptosis signaling pathway, proteoglycans in cancer, carbohydrate homeostasis, cell growth and liver regeneration, the immune response mediated via NF $\kappa$ B activation, RNA splicing, mitosis and spindle organization, regulation of cell-matrix- adhesion, or ER protein processing (Figure S2A-B). At the cellular compartment level, we found again compartments that directly echoed the previous biological processes, as spliceosomes, the proteasome, and the membrane and cell-substrate junctions. However, some pathways affected by hepatotoxic compounds of the CP\_eTox\_H\_HT dataset were new or allowed to complete some mechanisms.

For example, cell adhesion and ECM, that could be associated with liver injuries, are controlled by the RAP1 signaling pathway, itself affected by cluster 37 and 119<sup>23</sup>.

Then, we saw with the DILIrank datasets that a potential mechanism of DILI was a perturbation of the carbohydrate homeostasis. According to the KEGG pathway analysis, the peroxisome proliferator-activated receptor (PPAR) signaling pathway was affected by DILI compounds of cluster 97 (Figure S2A). PPARs are known to modulate the lipid homeostasis, and dysfunctions of them may cause steatosis or liver cancer<sup>24</sup>.

Regarding the kinase activity, clusters 43, 46, 119, 123, 135 and 137 have an effect on several pathways related to it, such as the MAPK and ERK signaling pathways. ERK is a cascade included in MAPK cascade involved into NFκB activation and the inflammatory response too<sup>25</sup>.

On the subject of the drug-triggered inflammatory response, the pathway analysis of the CP\_eTox\_H\_HT dataset showed that Tumor Necrosis Factor (TNF) signaling pathway and Fc receptor mediated signaling pathway including phagocytosis can both be impacted by hepatotoxic compounds (Figure S2A-B). Literature confirmed that these two pathways can be associated with liver diseases as nonalcoholic fatty liver disease (NAFLD) or hepatocellular carcinoma (HCC)<sup>16,26</sup>. Still regarding the immune response, KEGG enrichment pointed genes of the NOD-like receptor and c-type lectin receptor signaling pathways as significantly differentially expressed by respectively hepatotoxic compounds of the cluster 136, and 35 and 136 (Figure S2A). NOD-like receptors are actors of the immune response and can be associated with cases of fibrosis<sup>27,28</sup>. C-type lectin receptors are part of the immune system too and can be related to cirrhosis too<sup>29</sup>.

We already detailed how endoplasmic reticulum (ER) protein processing and more particularly the ubiquitin-mediated proteolysis, can be linked to drug-induced liver injuries. Figure S2B showed that clusters can affect the activation of the unfolded protein response (UPR) pathway too, known to be able to cause the triggering of the ER stress. Thus, taken

together, ER and UPR pathways can have a huge contribution to the development of liver diseases such as steatosis, NAFLD or cholestatic liver diseases<sup>30</sup>.

Finally, the third GO term was the regulation of the Notch signaling pathway. Notch pathway has a central role in tissue development and homeostasis and its involvement in the liver fibrosis, via for instance nitric oxide production, is known and demonstrated. Moreover, studies also revealed that Notch is connected to glucose and lipid metabolism, which are directly correlated to steatosis development<sup>31</sup>.

According to heatmap of Figure S2B, mitochondria, which is an organelle known to be sensitive to hypoxia condition in case of liver injuries<sup>32</sup>, appeared too as a targeted area of hepatotoxic drugs. Moreover, reactions to reactive oxygen species (ROS) and hypoxia were pointed out too (Figure S2B), and it has been demonstrated in literature that this could lead to hepatic inflammation and that it can be a process of DILI pathogenesis<sup>33</sup>.

**Figure S2.** Heatmaps of pathways significantly deregulated by the Cell-Painting features-based clusters of hepatotoxic compounds from the CP\_eTox\_H\_HT dataset. A. KEGG pathway analysis. B. GO BP pathway analysis. C. GO CC pathway analysis. Color scale is related to p-value. P-values equal or above 0.05 are in light green to white colors.

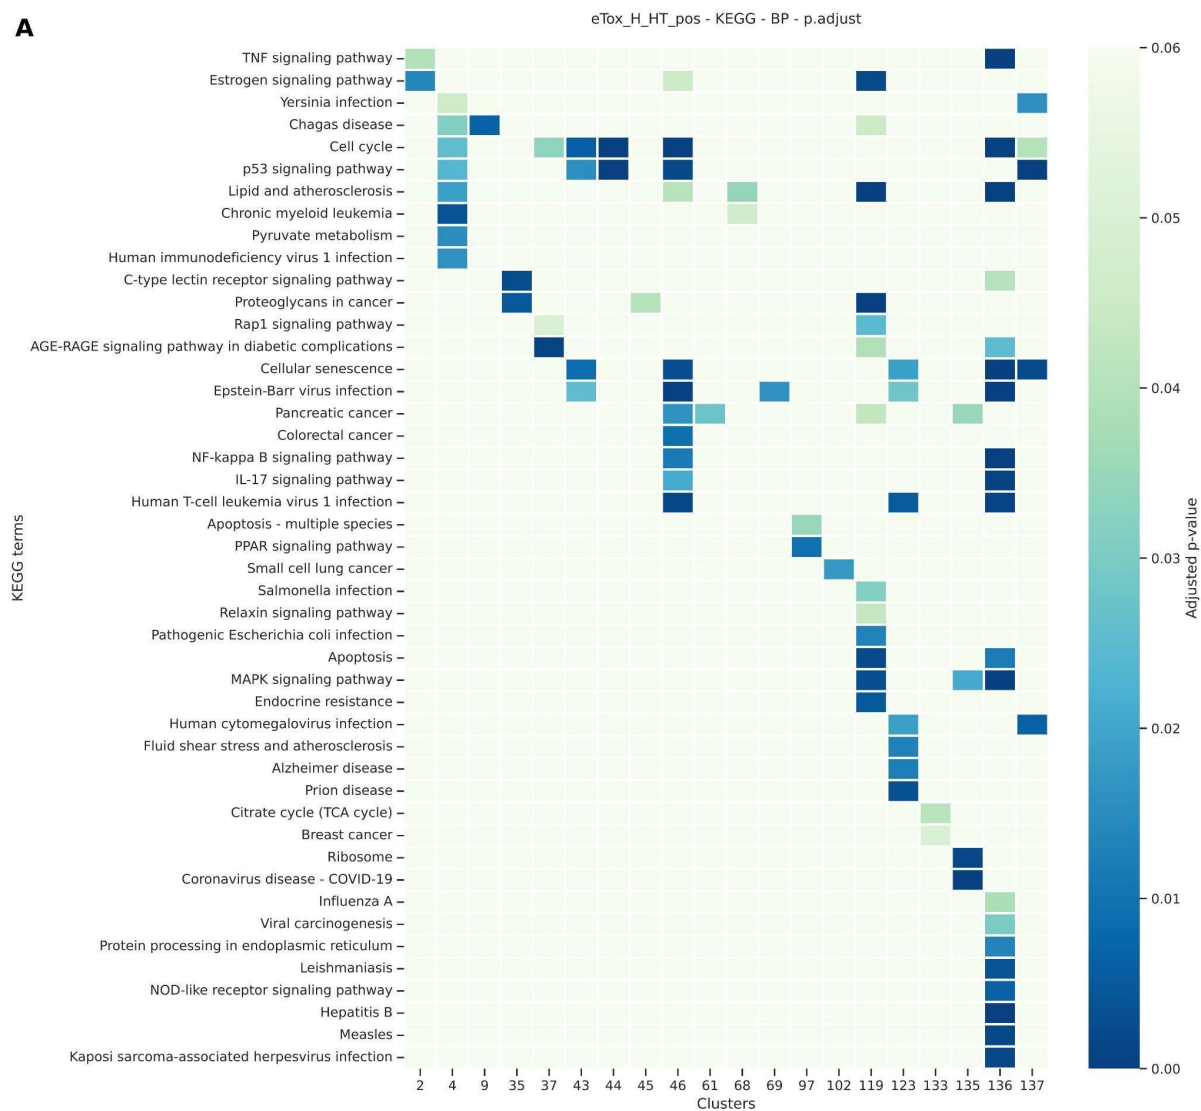



C

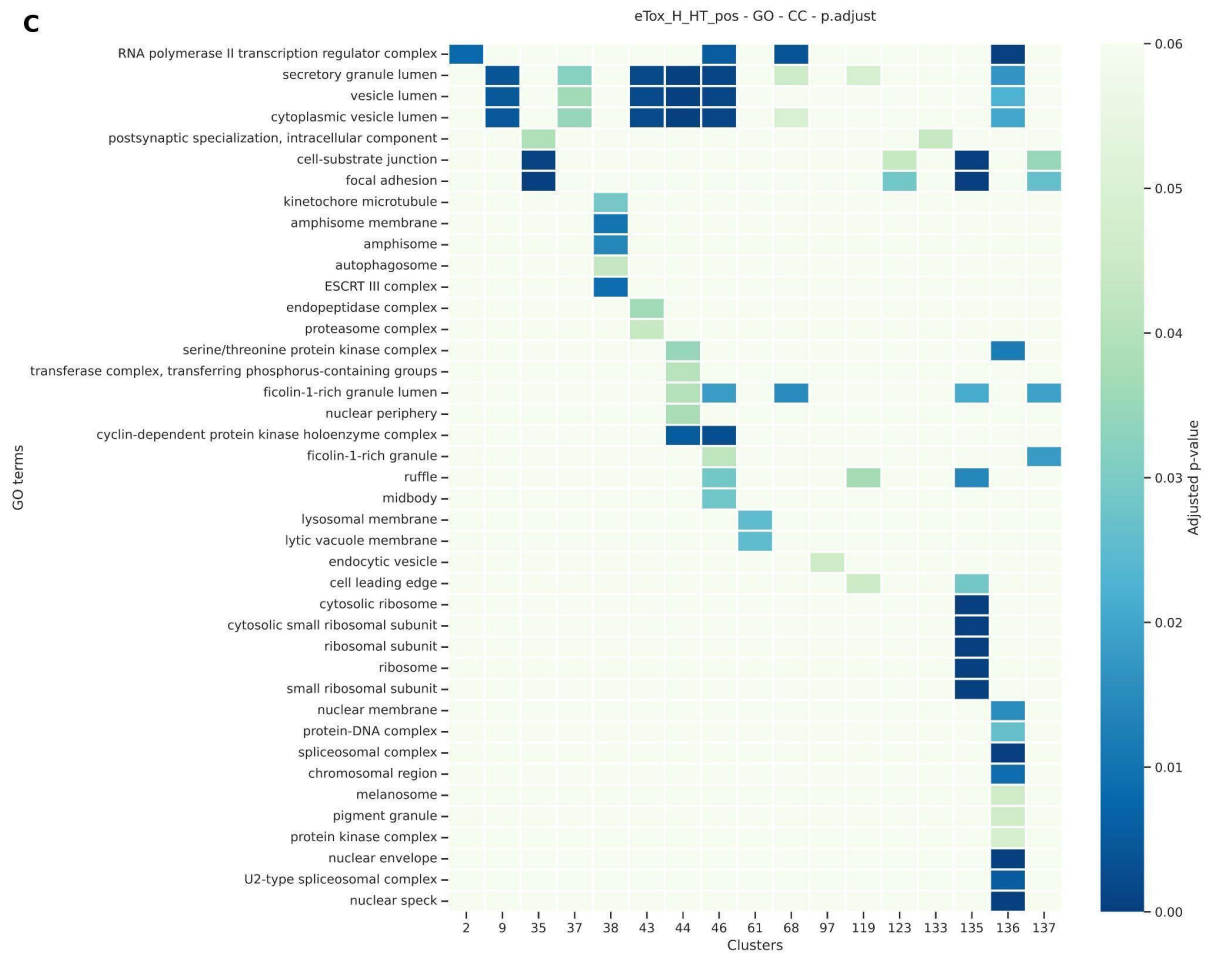

- *CP\_eTox\_H\_MF dataset*

**Figure S3.** Heatmaps of pathways significantly deregulated by the Cell-Painting features-based clusters of hepatotoxic compounds from the CP\_eTox\_H\_MF dataset. A. KEGG pathway analysis. B. GO BP pathway analysis. C. GO CC pathway analysis. Color scale is related to p-value. P-values equal or above 0.05 are in light green to white colors.

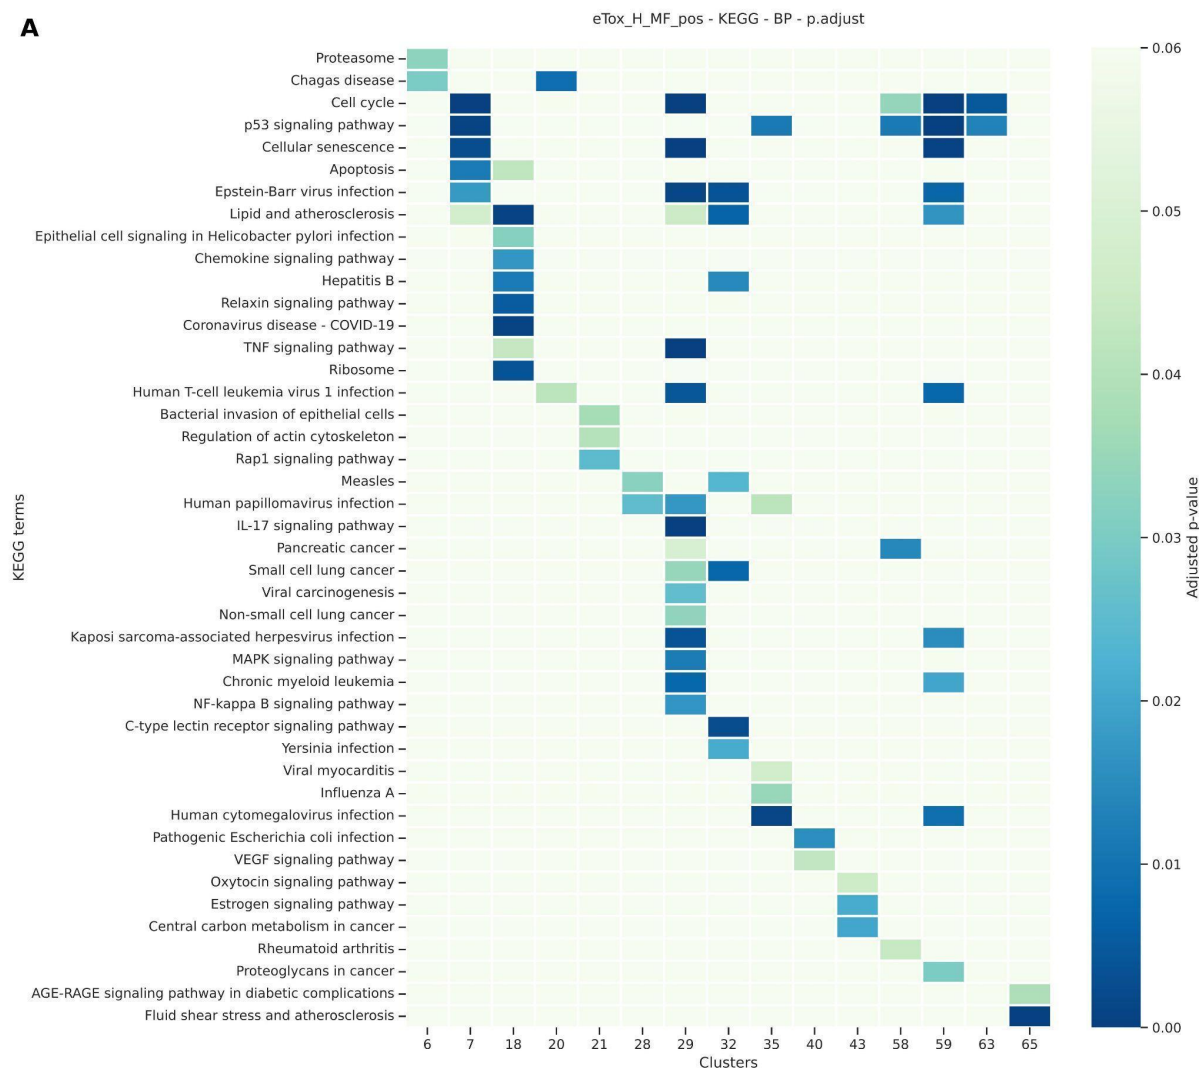

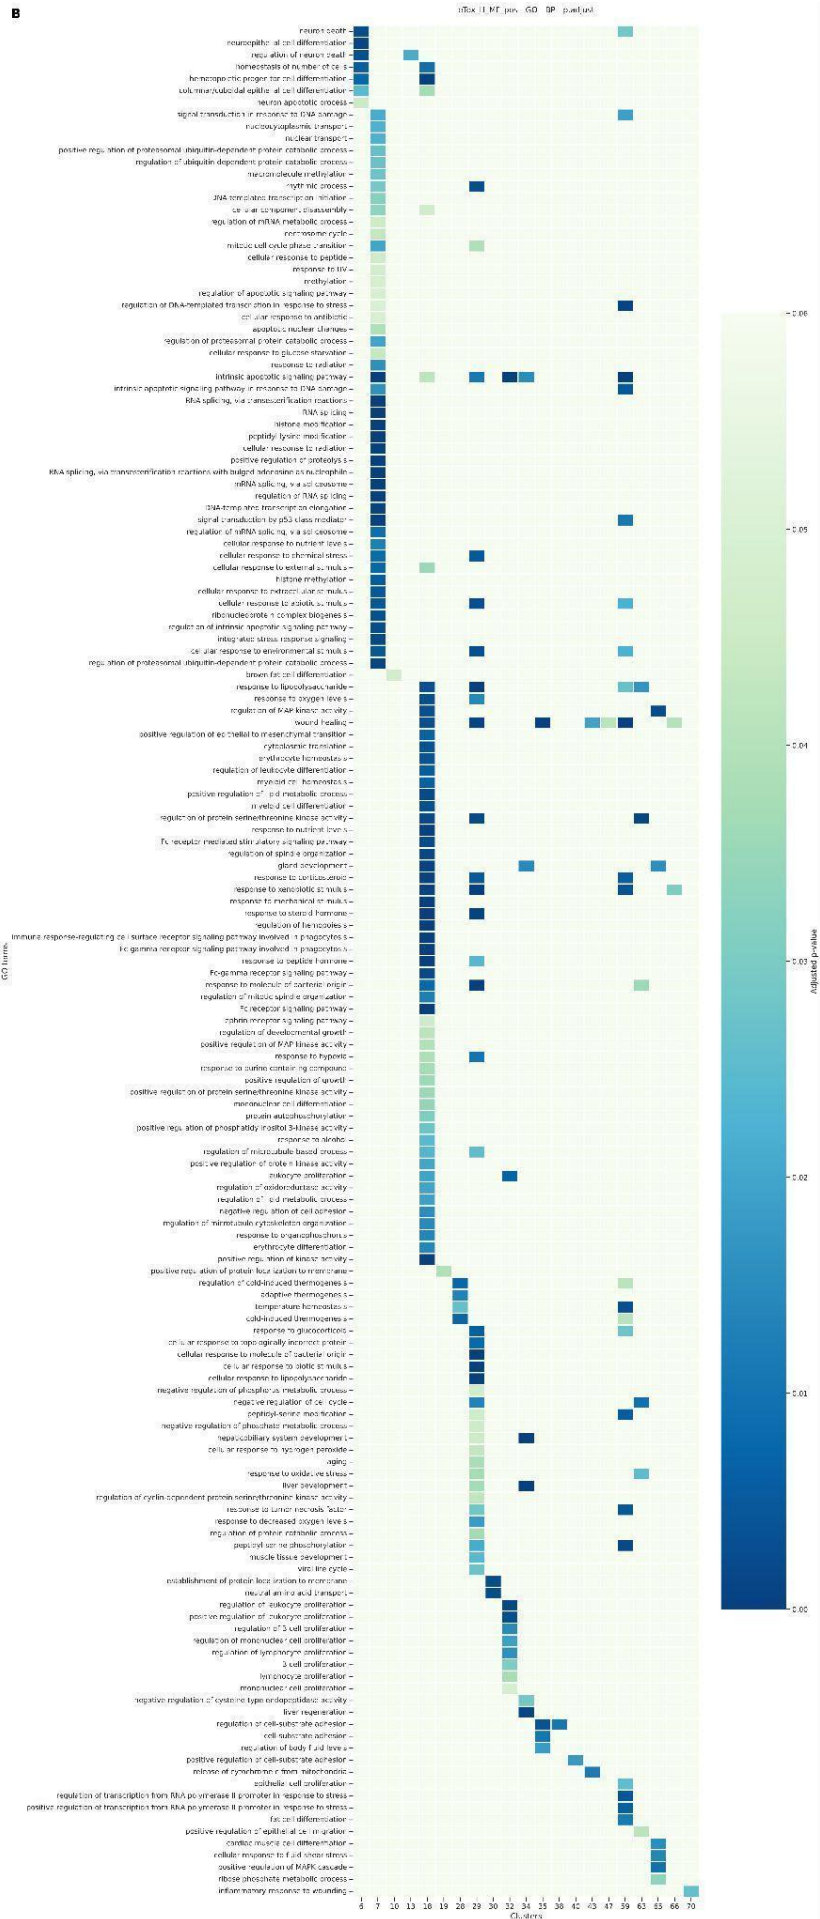



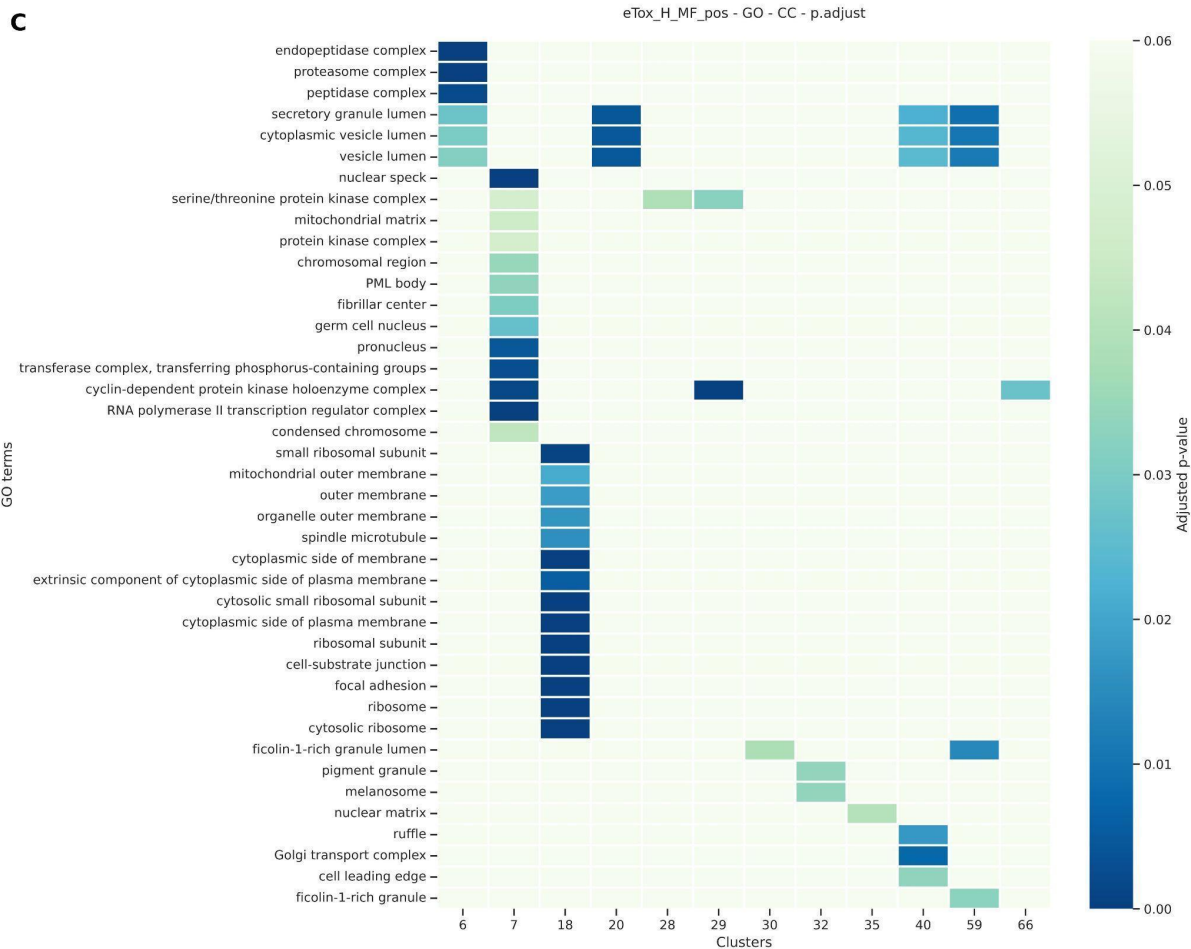

Many KEGG and GO terms that showed up from the pathway analysis dealt with terms already encountered previously: cell cycle, cell proliferation via NFκB, activation of the apoptotic pathway in response to stress and through the p53 factor, deregulation of the kinase activity including MAPK and ERK, microtubule and spindle organization, *etc* (Figure S3).

Only two new biological processes were highlighted. First is a perturbation of actin filament and non-membrane-bounded organelle assemblies (of which actin cytoskeleton is part of) (Figure S3A-B). Previous studies revealed that actin cytoskeleton could be linked firstly to hepatic fibrosis via the activation of hepatic stellate cell<sup>34</sup> and secondly to apoptosis<sup>35</sup>.

Second is the ephrin receptor signaling pathway (Figure S3B). Ephrin receptors are types of receptor tyrosine kinase with a role in cell adhesion or in developmental processes for

example. However, studies on hepatic fibrosis in mice identified the EphB2 ephrin receptor as a prominent actor of liver fibrogenesis through an overactivation of the immune system<sup>36,37</sup>.

**- CP\_eTox\_H\_MFHB dataset**

Gene enrichment and pathway analysis of the CP\_eTox\_H\_MFHB dataset gave close results from those observed with the CP\_eTox\_H\_HT and CP\_eTox\_H\_MF datasets (Figure S4).

**Figure S4.** Heatmaps of pathways significantly deregulated by the Cell-Painting features-based clusters of hepatotoxic compounds from the CP\_eTox\_H\_MFHB dataset. A. KEGG pathway analysis. B. GO BP pathway analysis. C. GO CC pathway analysis. Color scale is related to p-value. P-values equal or above 0.05 are in light green to white colors.

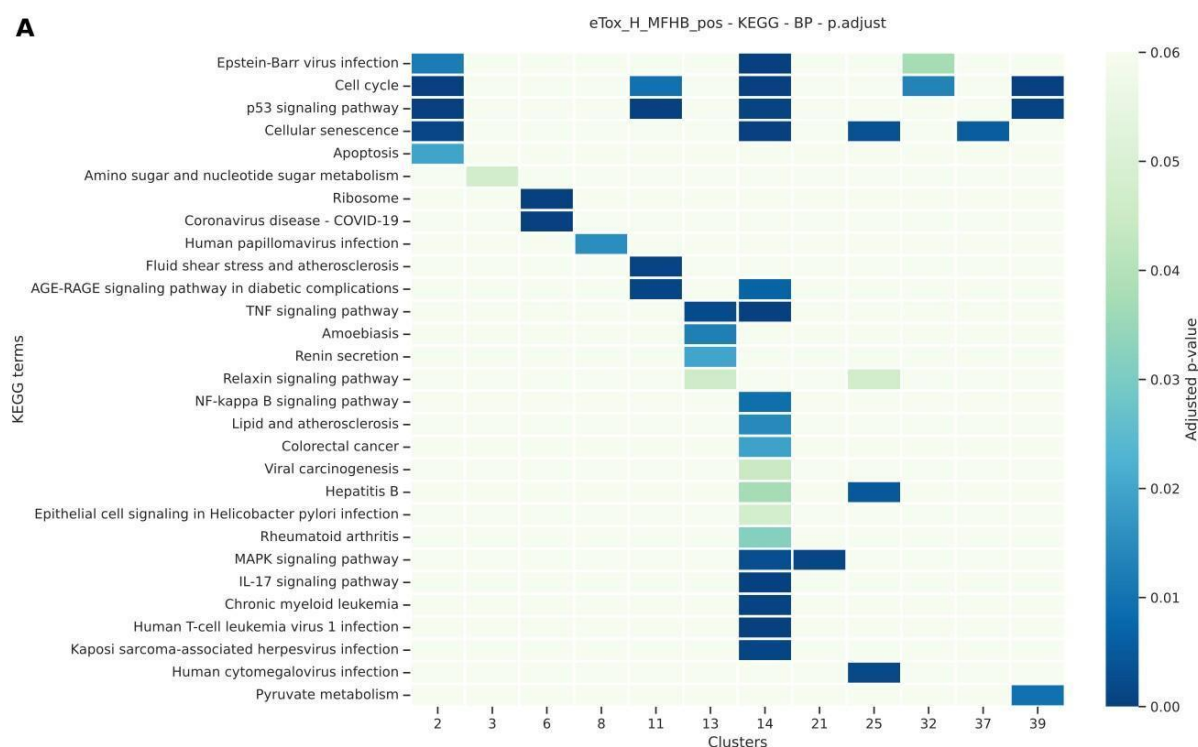

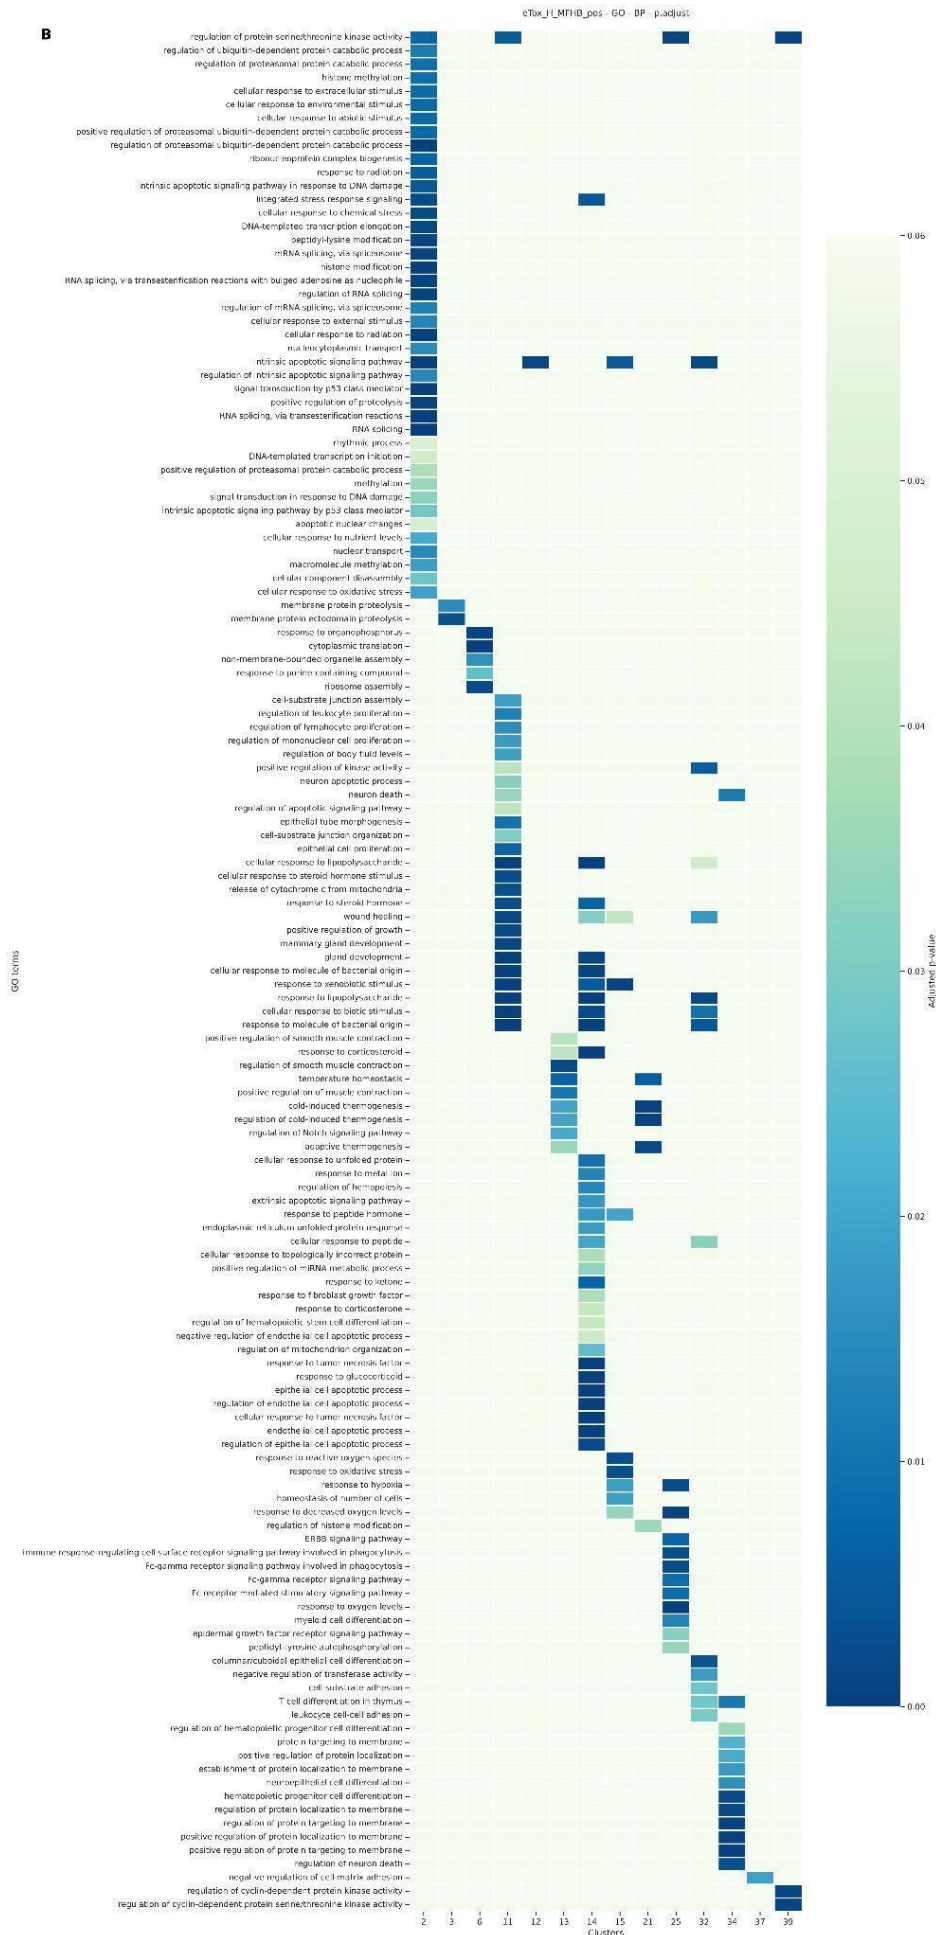

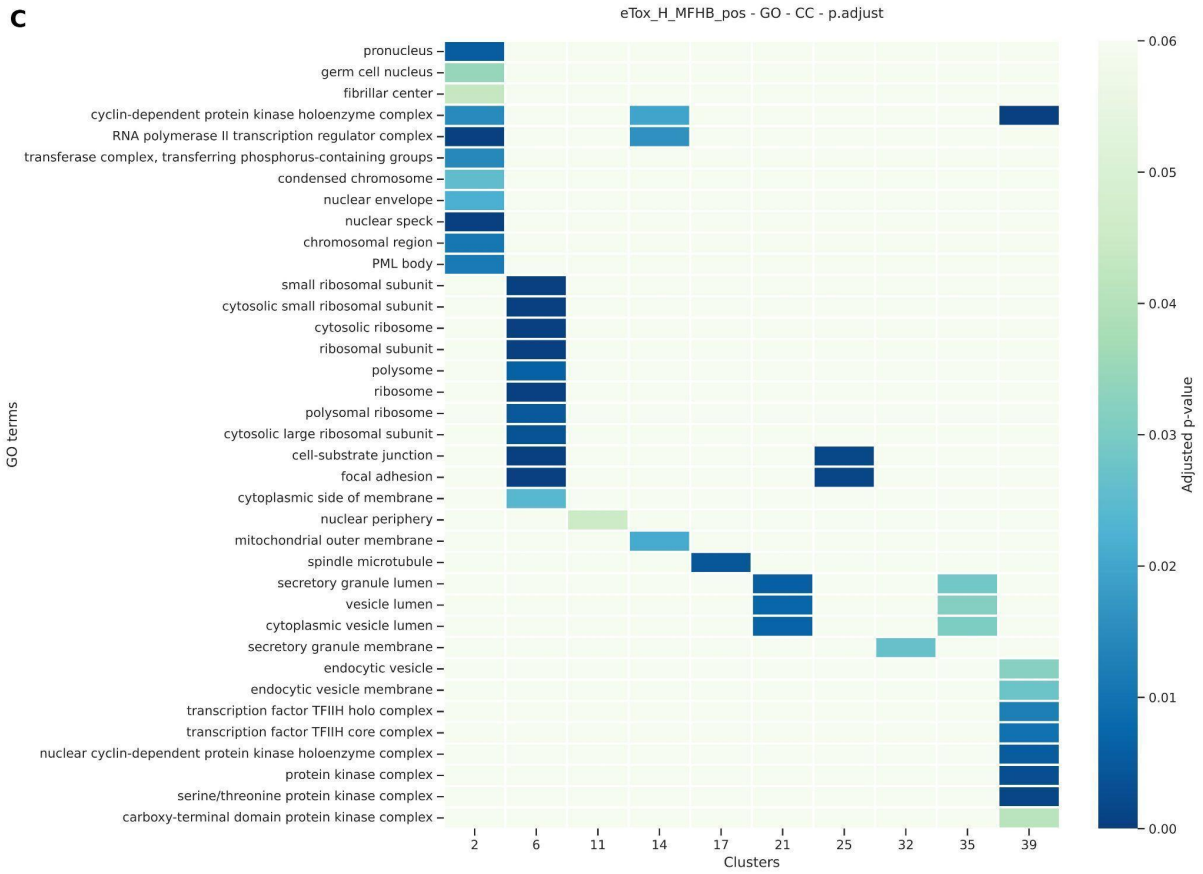

- *CP\_eTox\_H\_MFHC dataset*

Results of the last eTox dataset CP\_eTox\_H\_MFHC provided the same information about deregulated pathways that we detailed previously (Figure S5).

**Figure S5.** Heatmaps of pathways significantly deregulated by the Cell-Painting features-based clusters of hepatotoxic compounds from the CP\_eTox\_H\_MFHC dataset. A. KEGG pathway analysis. B. GO BP pathway analysis. C. GO CC pathway analysis. Color scale is related to p-value. P-values equal or above 0.05 are in light green to white colors.

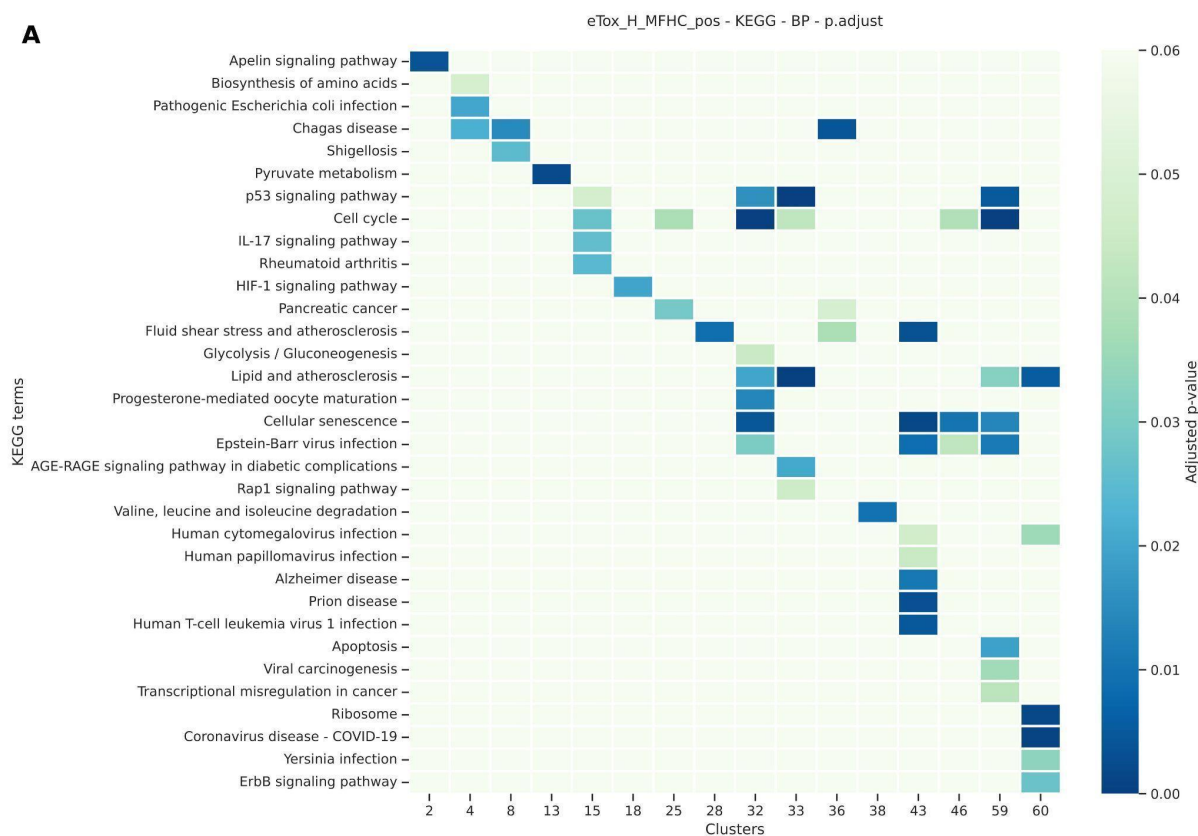



C

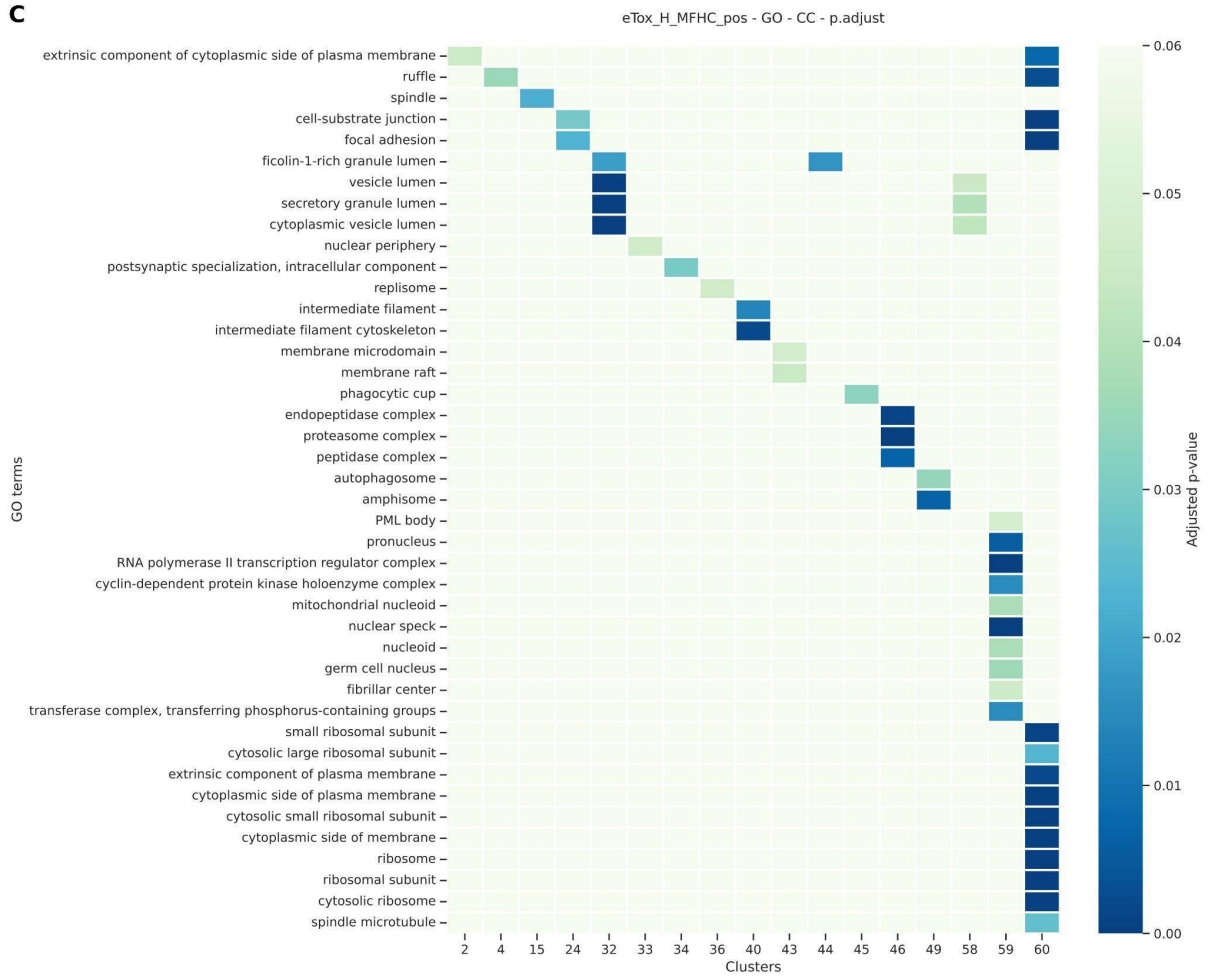

**Supplementary S2.** Analysis of permutation tests for CP\_DILIs\_pos\_neg, CP\_DILIs\_most\_neg, CP\_eTox\_H\_HT, CP\_eTox\_H\_MF, CP\_eTox\_H\_MFHB, and CP\_eTox\_H\_MFHC.

**Figure S6.** Histograms of validation set balanced accuracies obtained during the permutation tests with each best model according to CP\_DILIs\_pos\_neg, CP\_DILIs\_most\_neg, CP\_eTox\_H\_HT, CP\_eTox\_H\_MF, CP\_eTox\_H\_MFHB and CP\_eTox\_H\_MFHC datasets. A. Random Forest. B. Linear SVM. C. ElasticNet. Vertical red line represents the BA score obtained with the same model on original data.

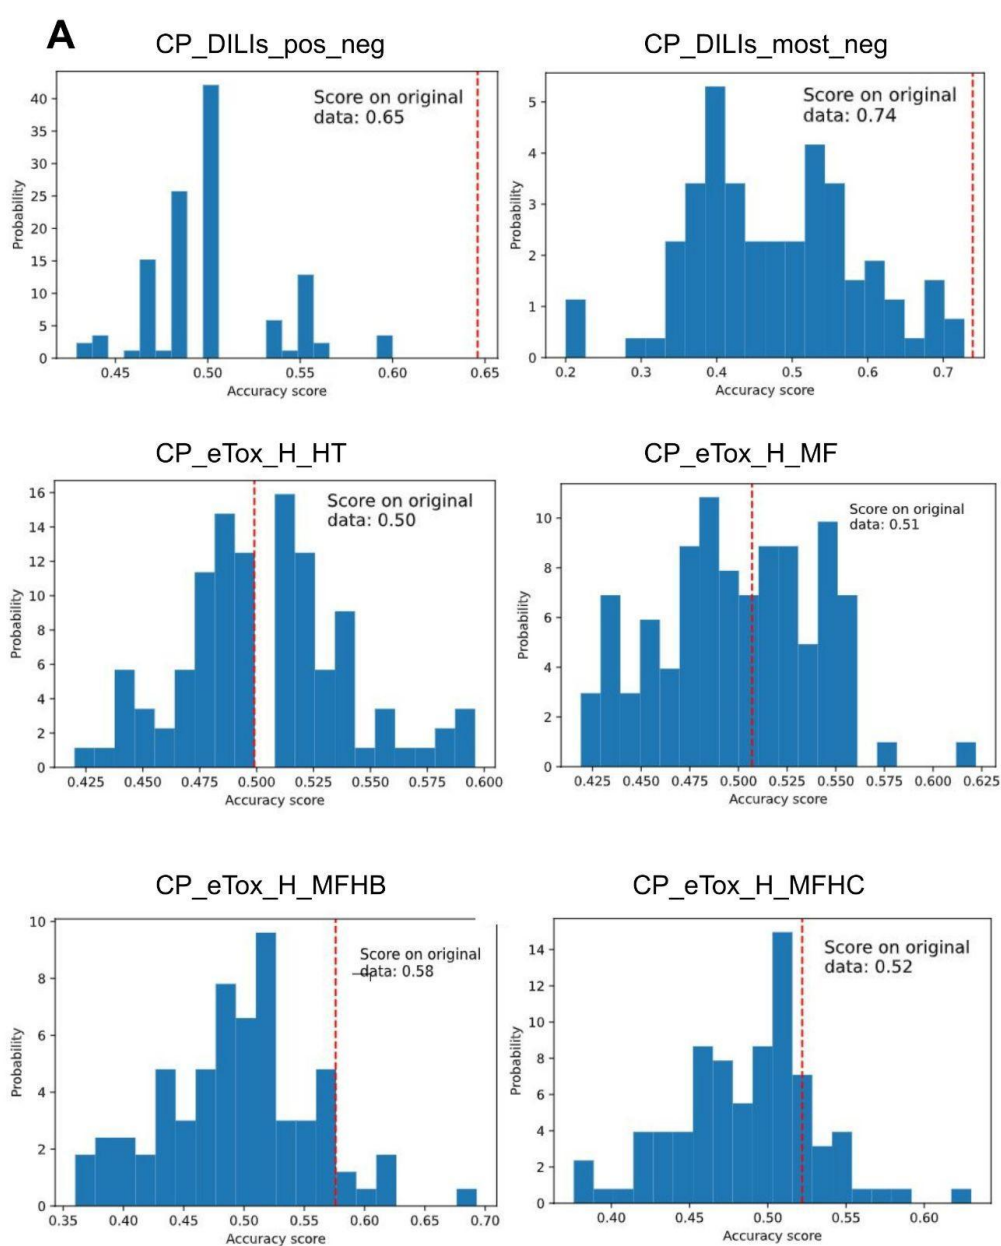



**B**

CP\_DILIs\_pos\_neg

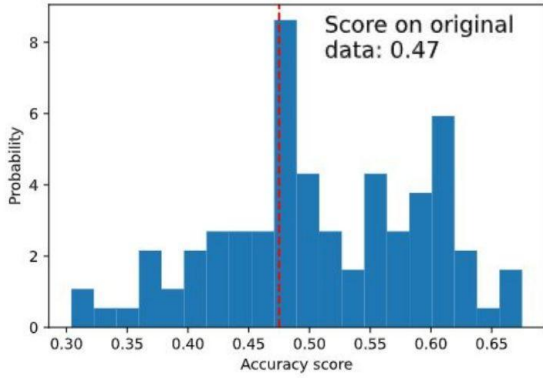

CP\_DILIs\_most\_neg

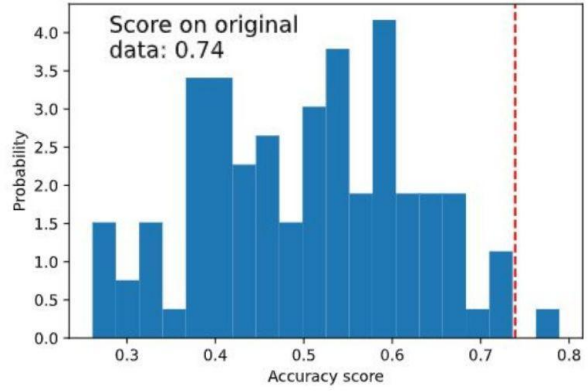

CP\_eTox\_H\_HT

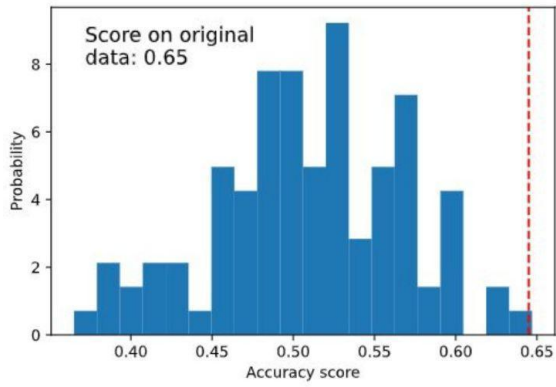

CP\_eTox\_H\_MF

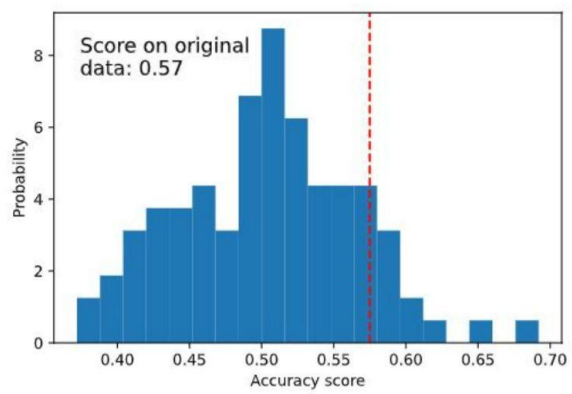

CP\_eTox\_H\_MFHB

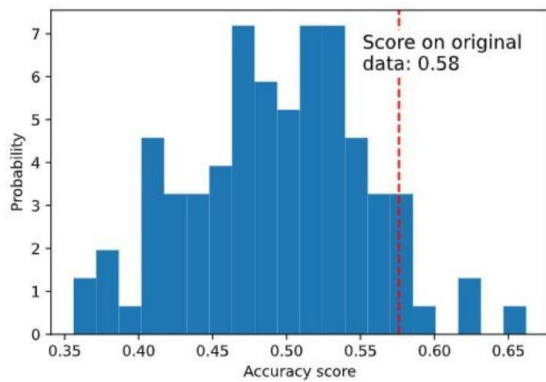

CP\_eTox\_H\_MFHC

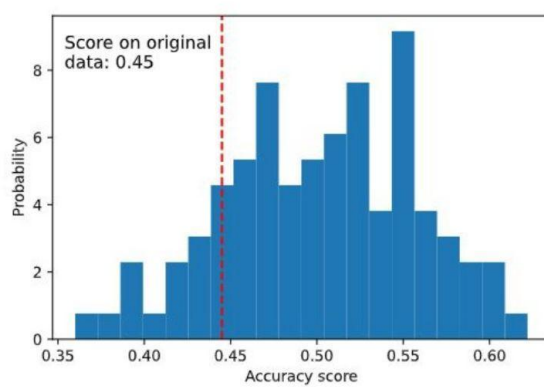

**C**

CP\_DILIs\_pos\_neg

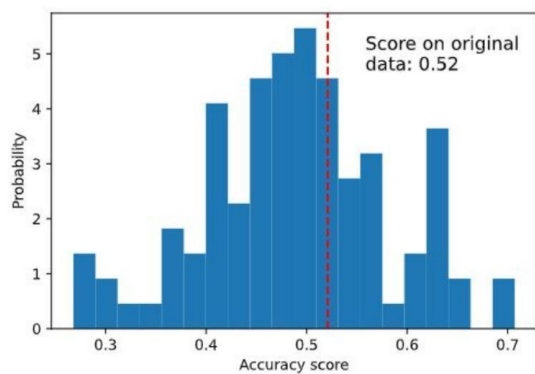

CP\_DILIs\_most\_neg

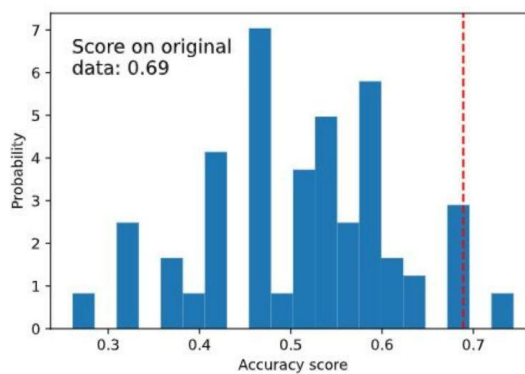

CP\_eTox\_H\_HT

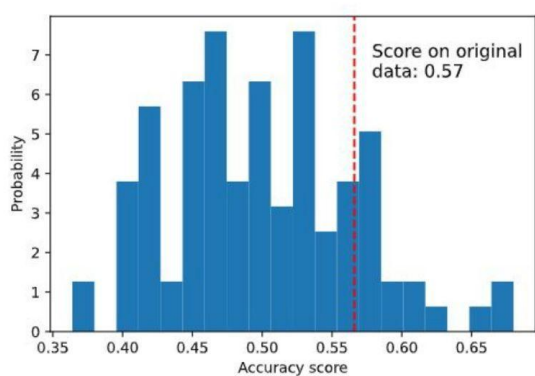

CP\_eTox\_H\_MF

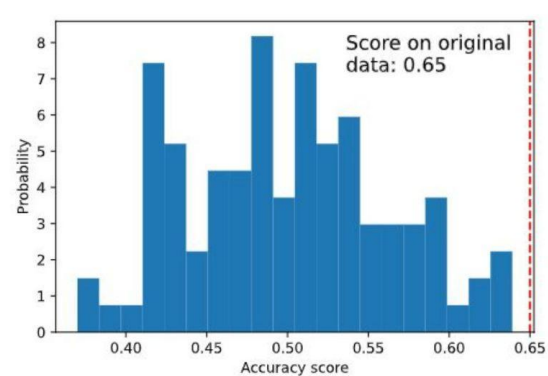

CP\_eTox\_H\_MFHB

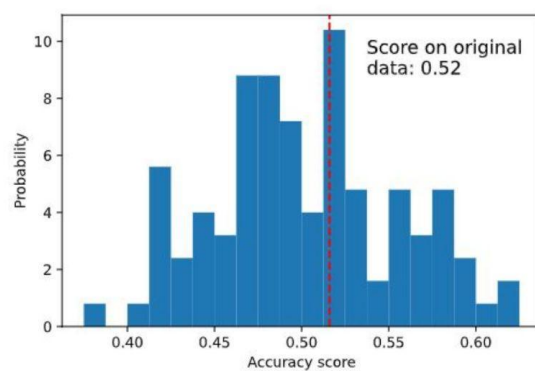

CP\_eTox\_H\_MFHC

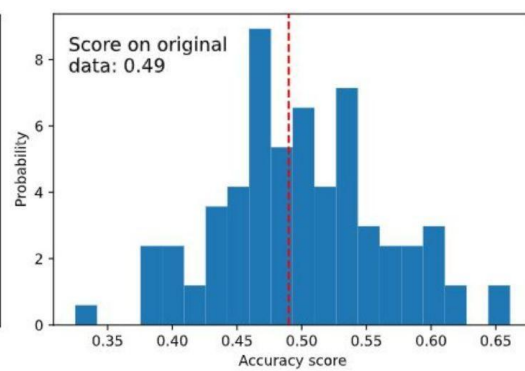

**Supplementary S3.** Heatmaps related to pathway analysis of the randomly created clusters from the hepatotoxic compounds of the CP\_DILIs\_pos\_neg, CP\_DILIs\_most\_neg, CP\_eTox\_H\_HT, CP\_eTox\_H\_MF, CP\_eTox\_H\_MFHB and CP\_eTox\_H\_MFHC datasets.

**Figure S7.** Heatmaps of pathways significantly deregulated by the randomly created clusters of hepatotoxic compounds from the CP\_DILIs\_pos\_neg dataset. A. KEGG pathway analysis. B. GO BP pathway analysis. C. GO CC pathway analysis. Color scale is related to p-value. P-values equal or above 0.05 are in light green.

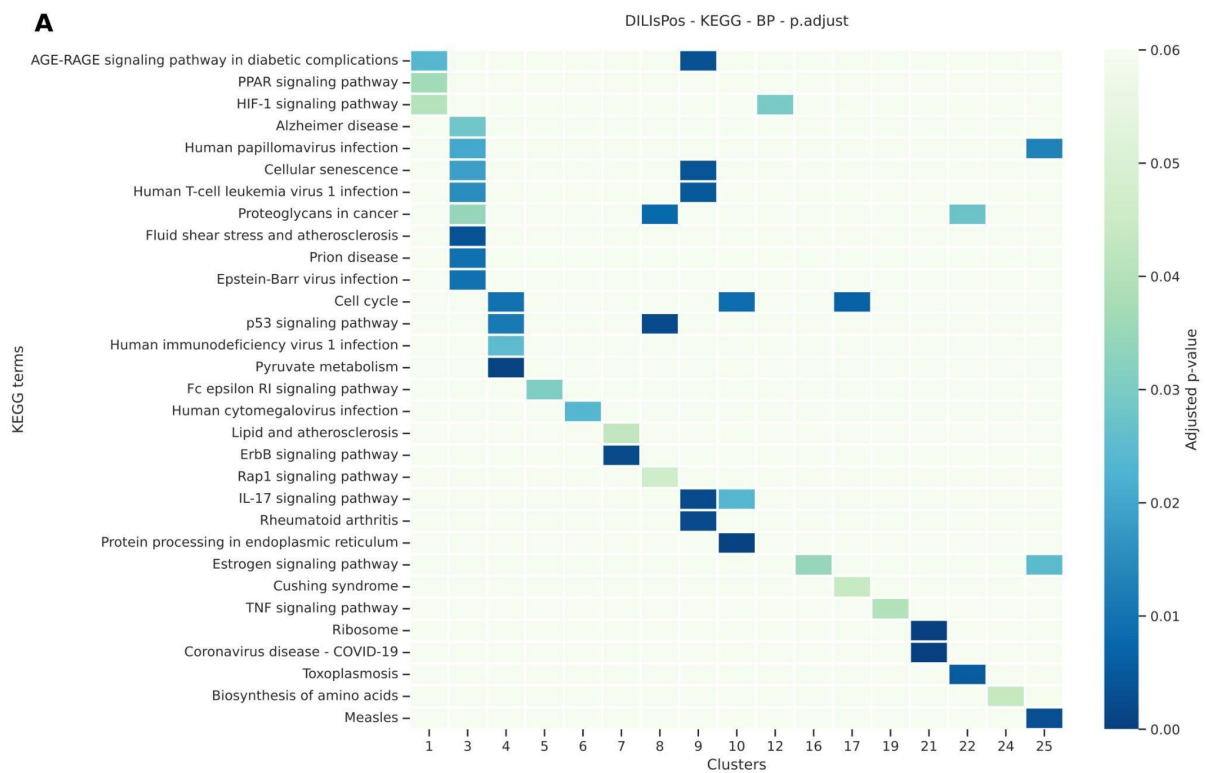



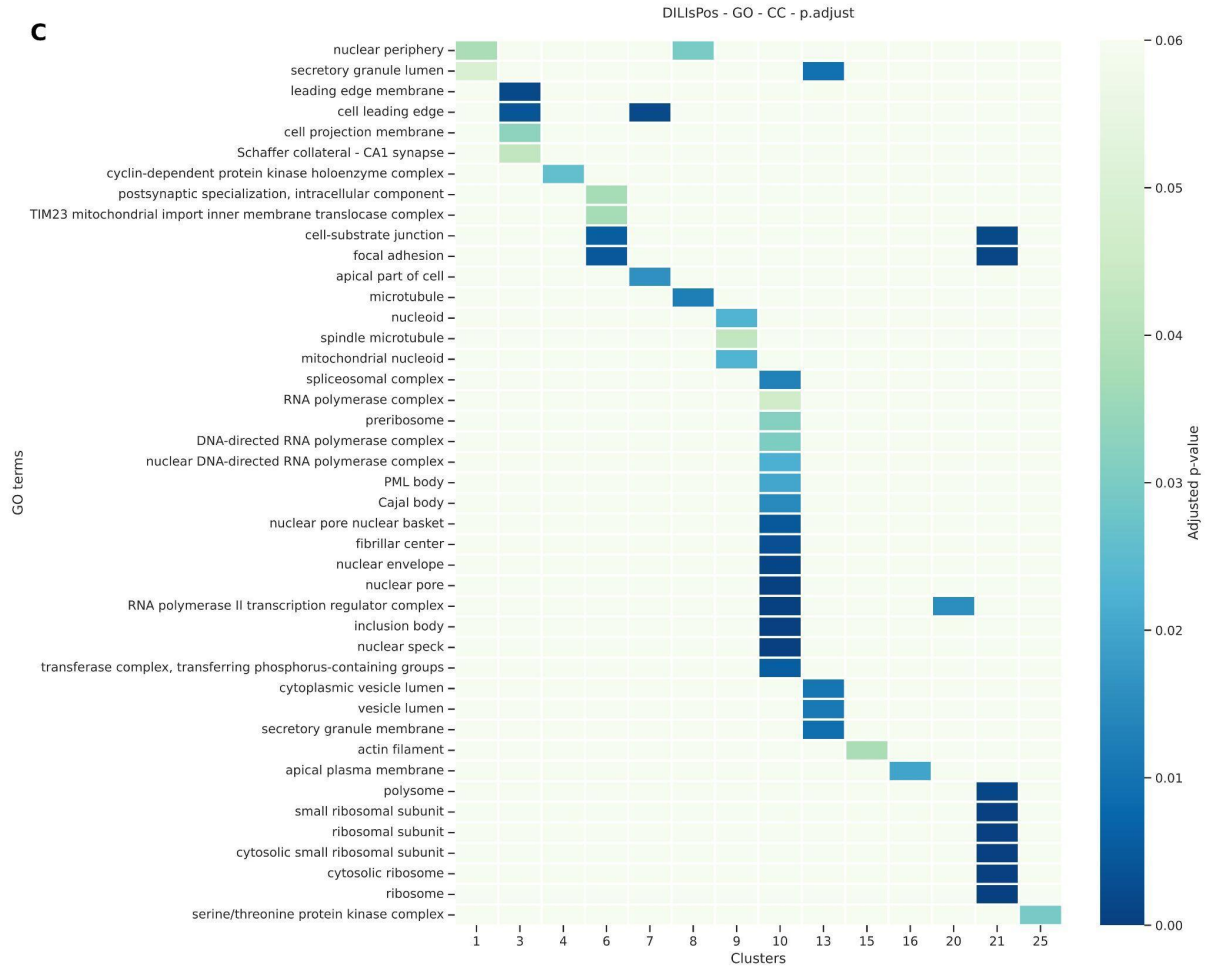

**Figure S8.** Heatmaps of pathways significantly deregulated by the randomly created clusters of hepatotoxic compounds from the CP\_DILIs\_most\_neg dataset. A. KEGG pathway analysis. B. GO BP pathway analysis. C. GO CC pathway analysis. Color scale is related to p-value. P-values equal or above 0.05 are in light green.

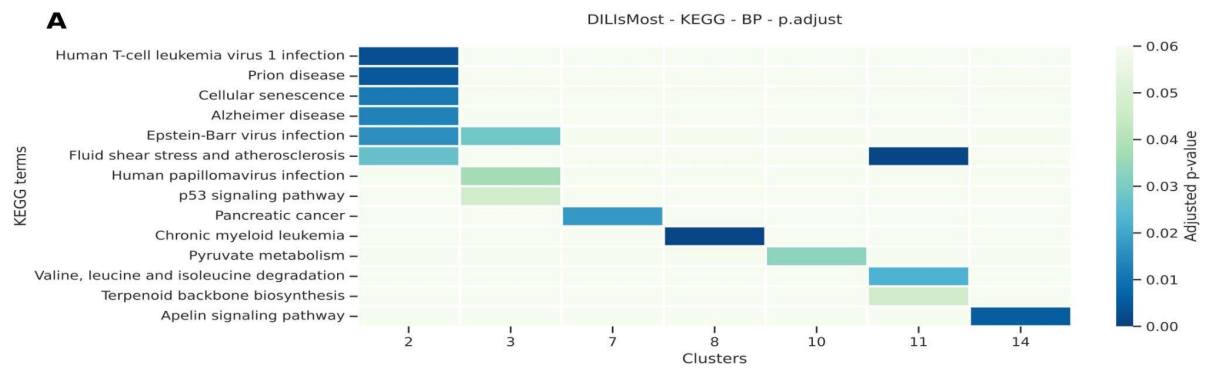

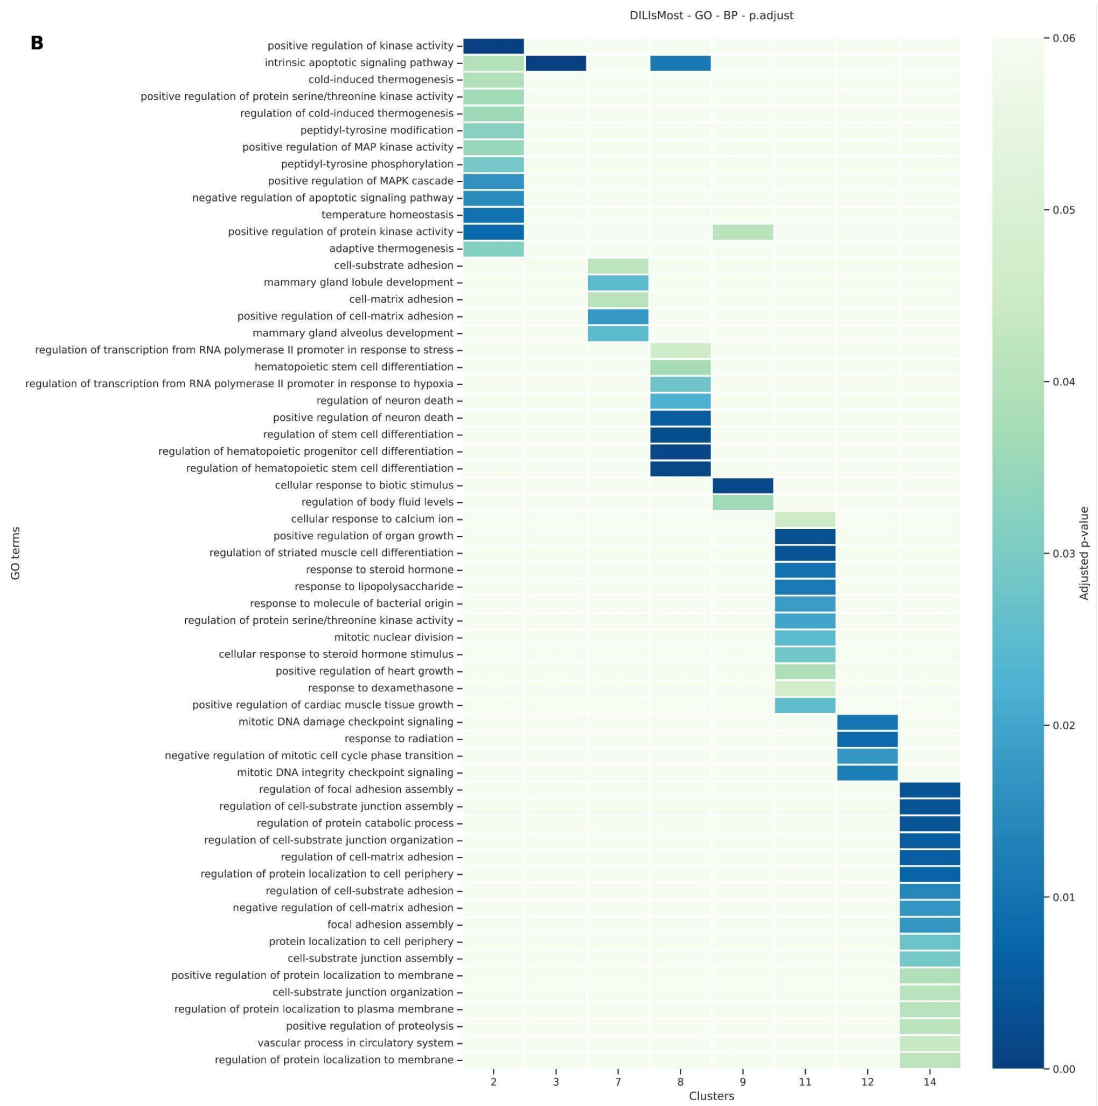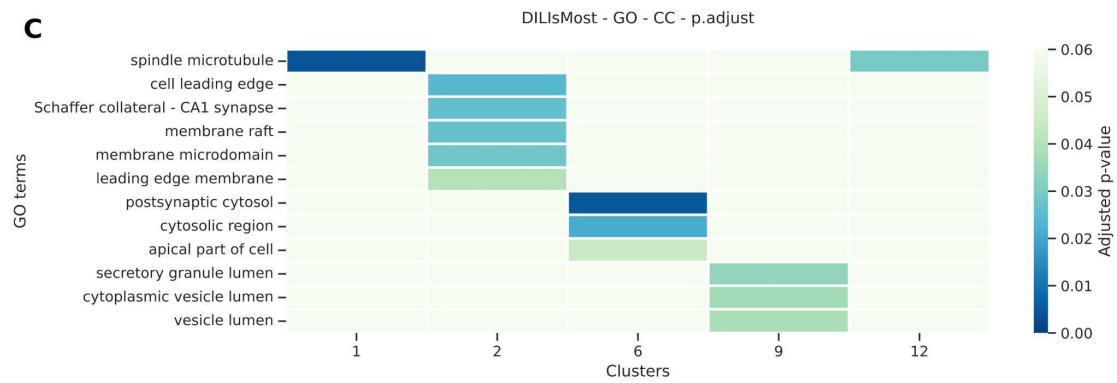





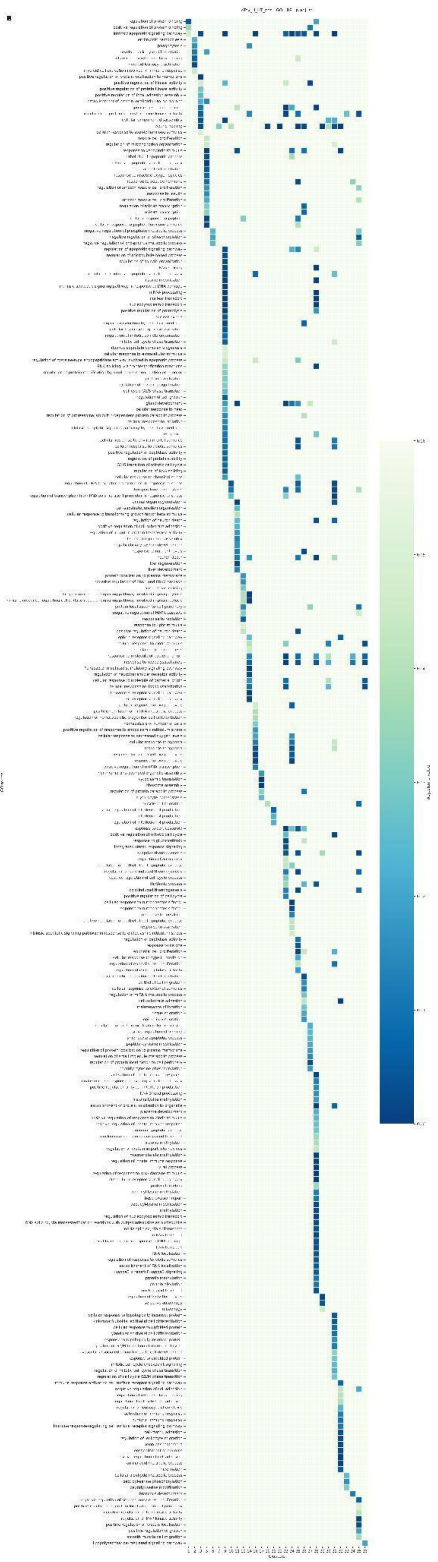

C

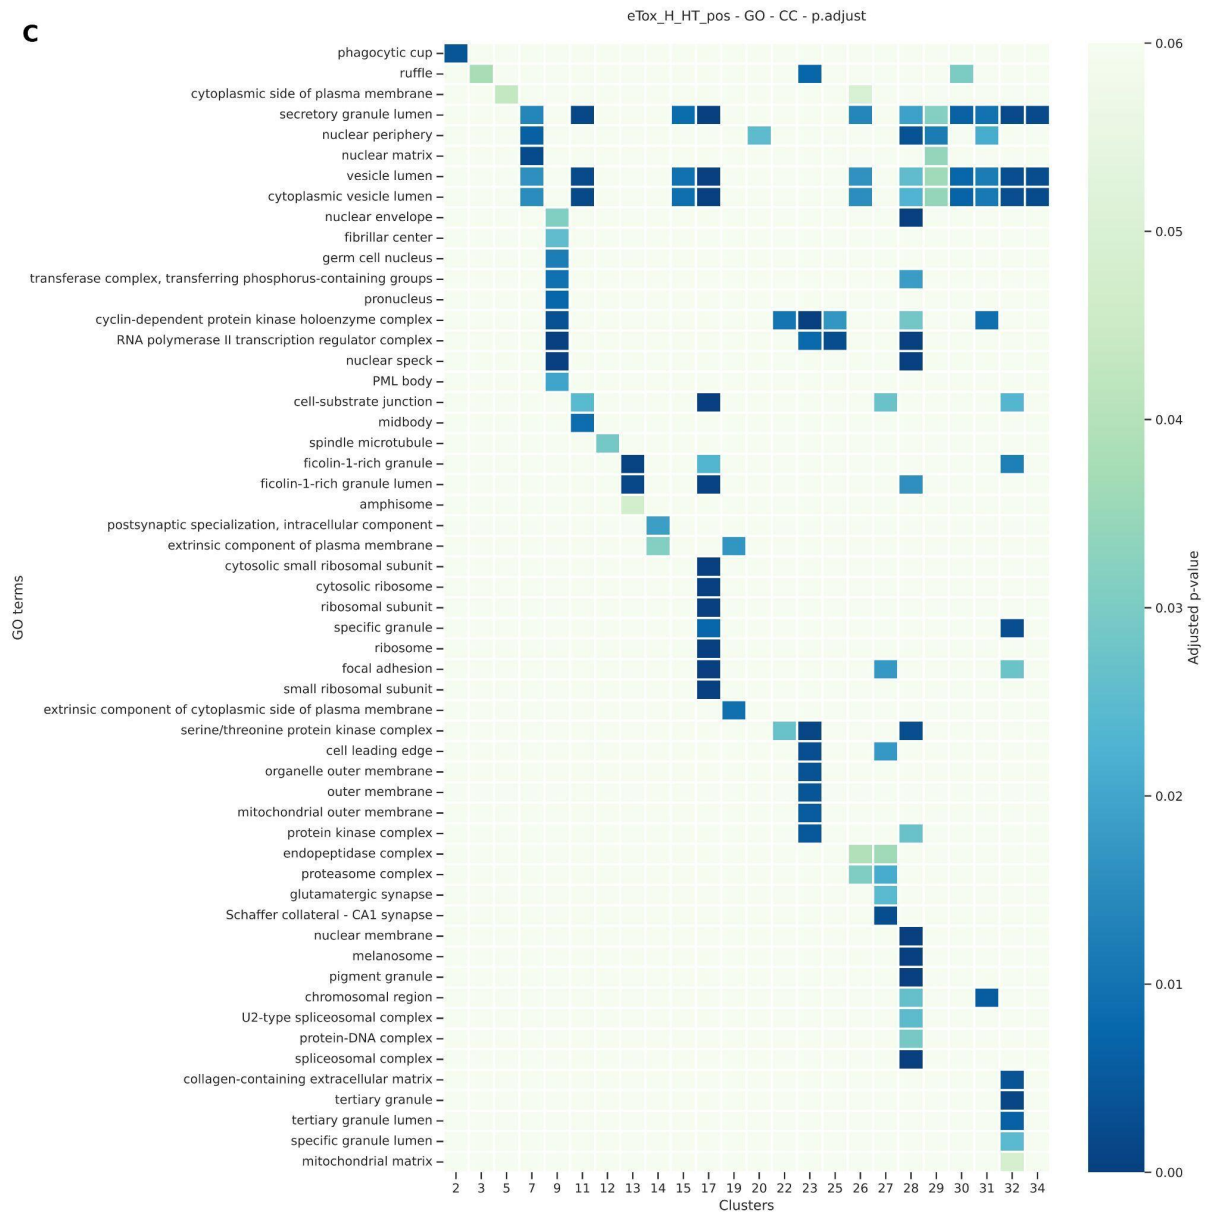

**Figure S10.** Heatmaps of pathways significantly deregulated by the randomly created clusters of hepatotoxic compounds from the CP\_eTox\_H\_MF dataset. A. KEGG pathway analysis. B. GO BP pathway analysis. C. GO CC pathway analysis. Color scale is related to p-value. P-values equal or above 0.05 are in light green. P-values below 0.05 are in shades of blue and green.

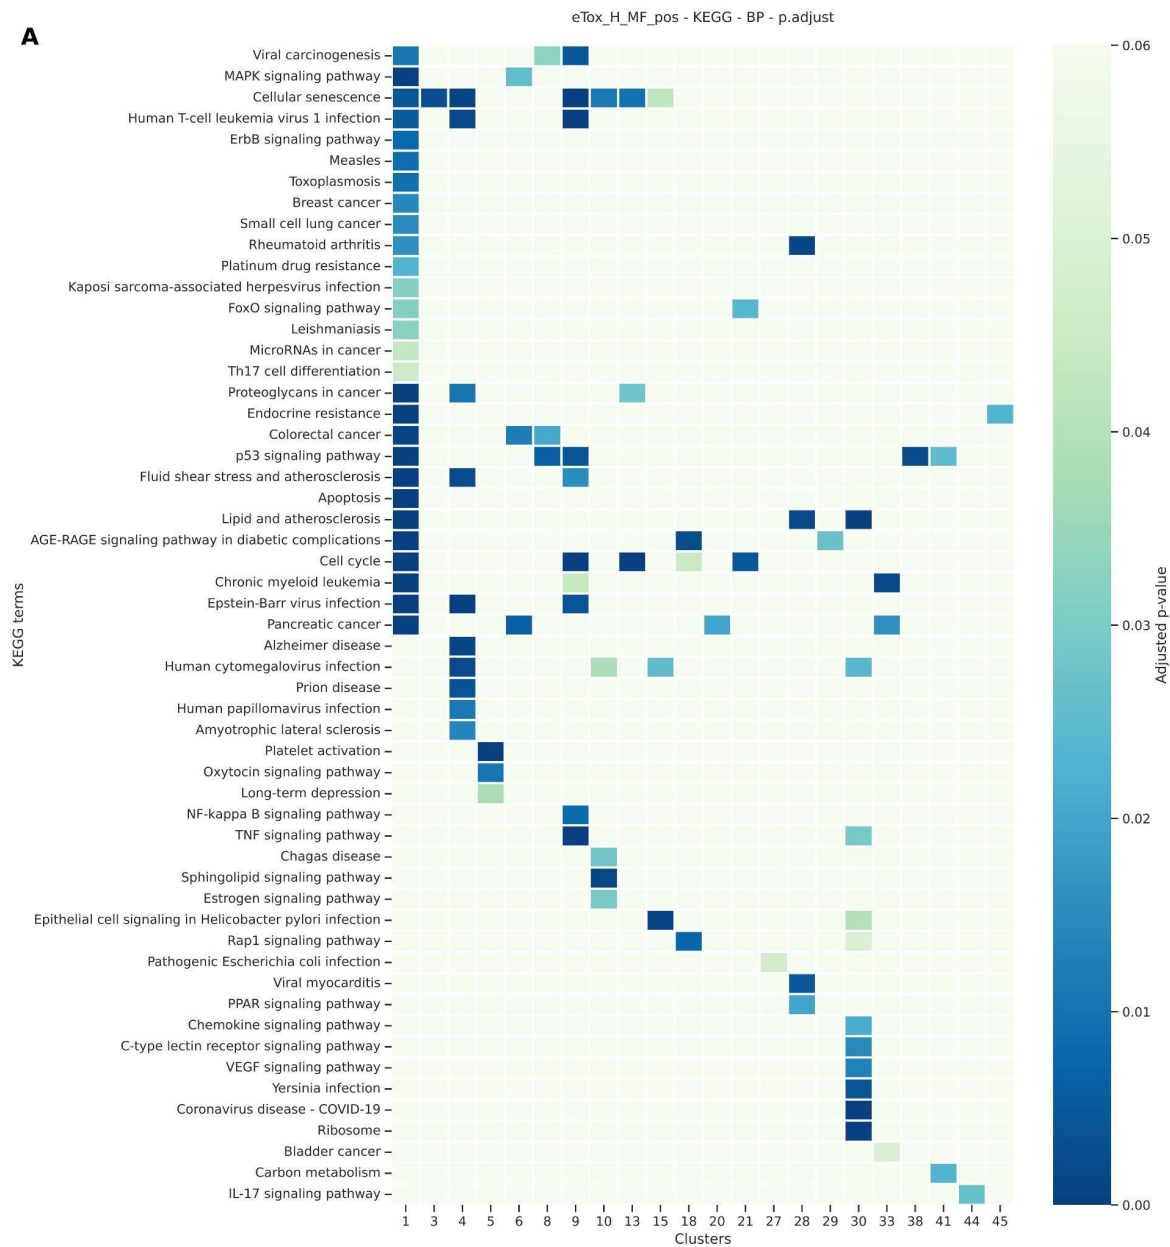

B

CHL1: NCBI CC BY 4.0

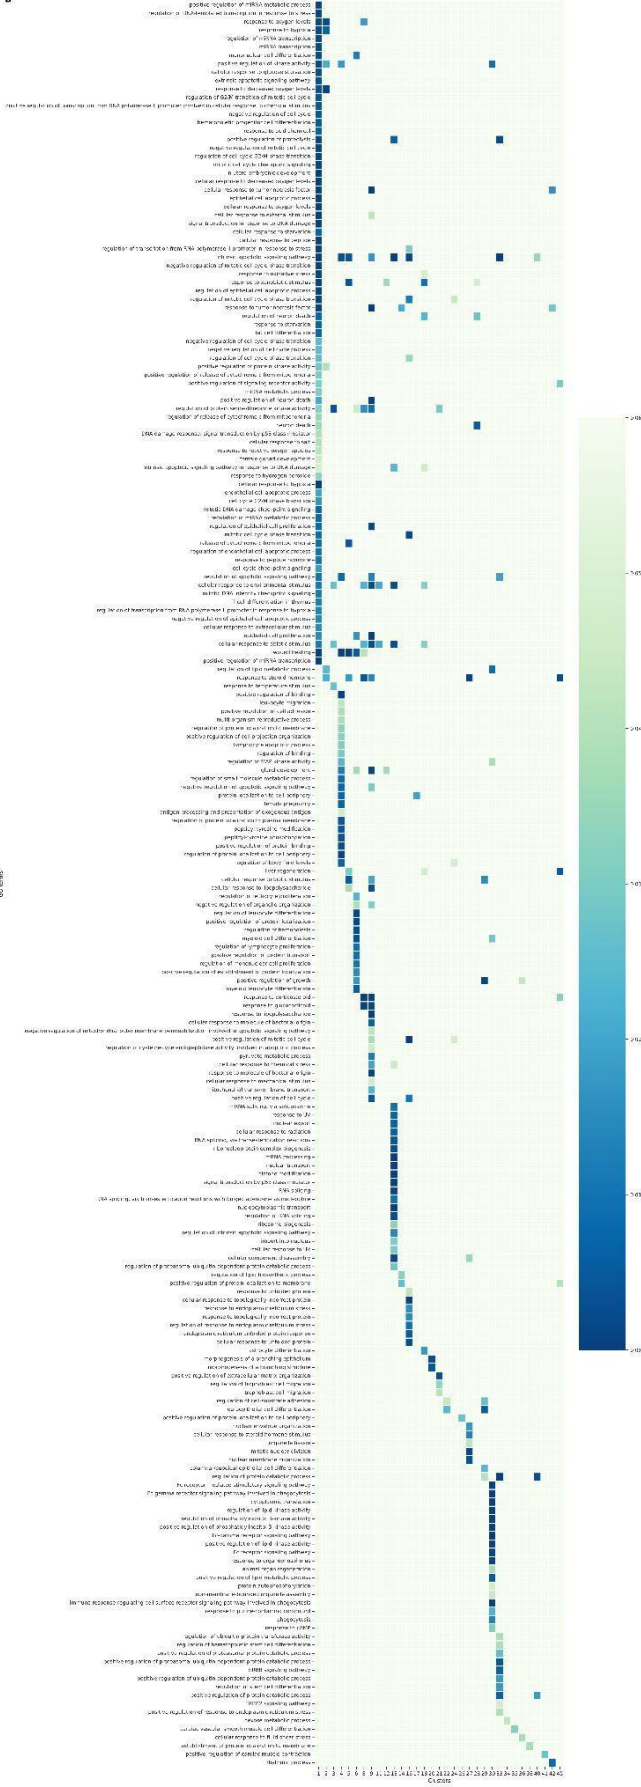

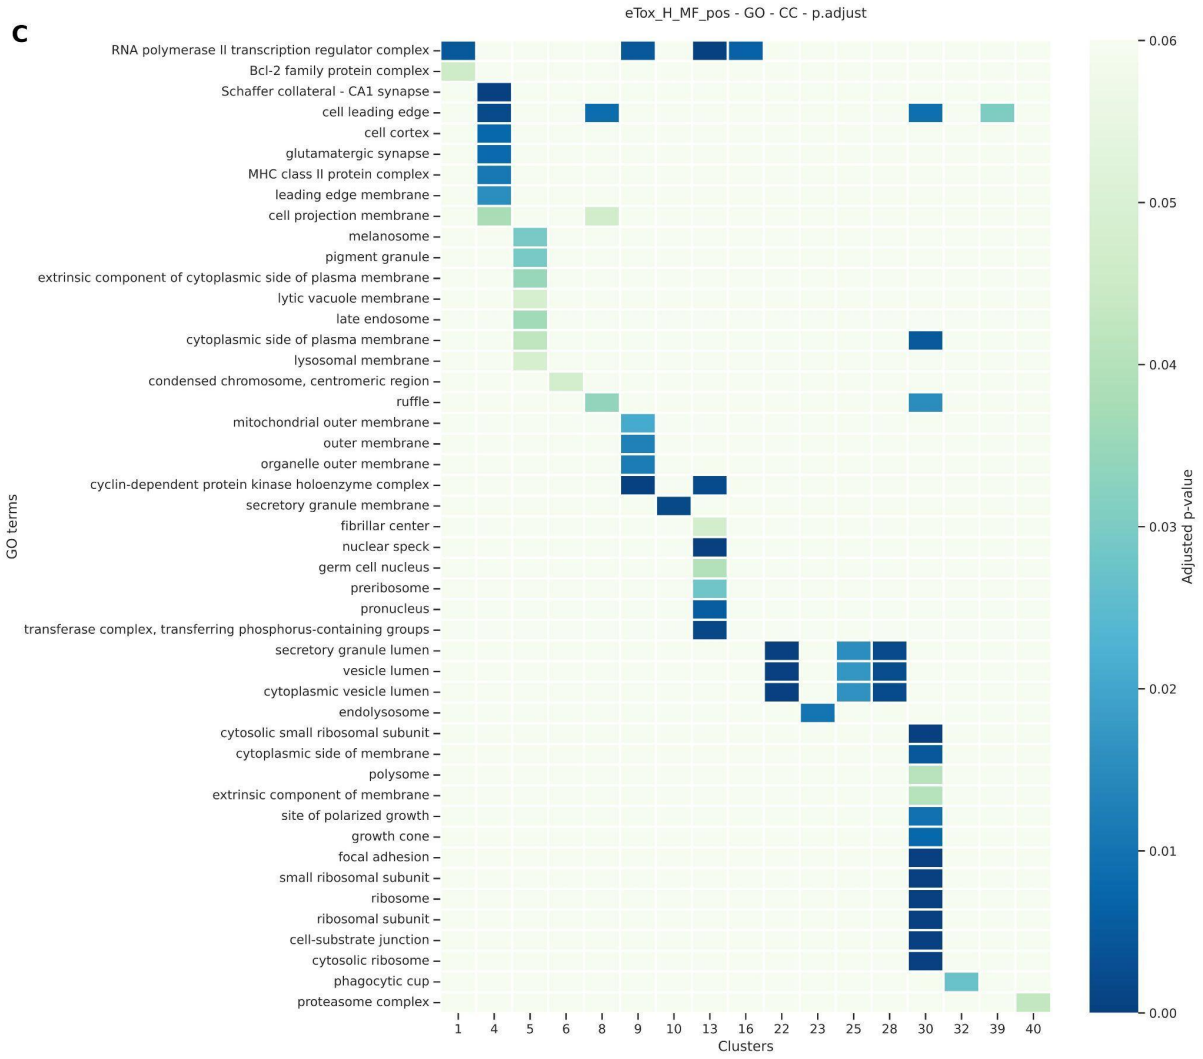

**Figure S11.** Heatmaps of pathways significantly deregulated by the randomly created clusters of hepatotoxic compounds from the CP\_eTox\_H\_MFHB dataset. A. KEGG pathway analysis. B. GO BP pathway analysis. C. GO CC pathway analysis. Color scale is related to p-value. P-values equal or above 0.05 are in light green. P-values below 0.05 are in shades of blue and green.

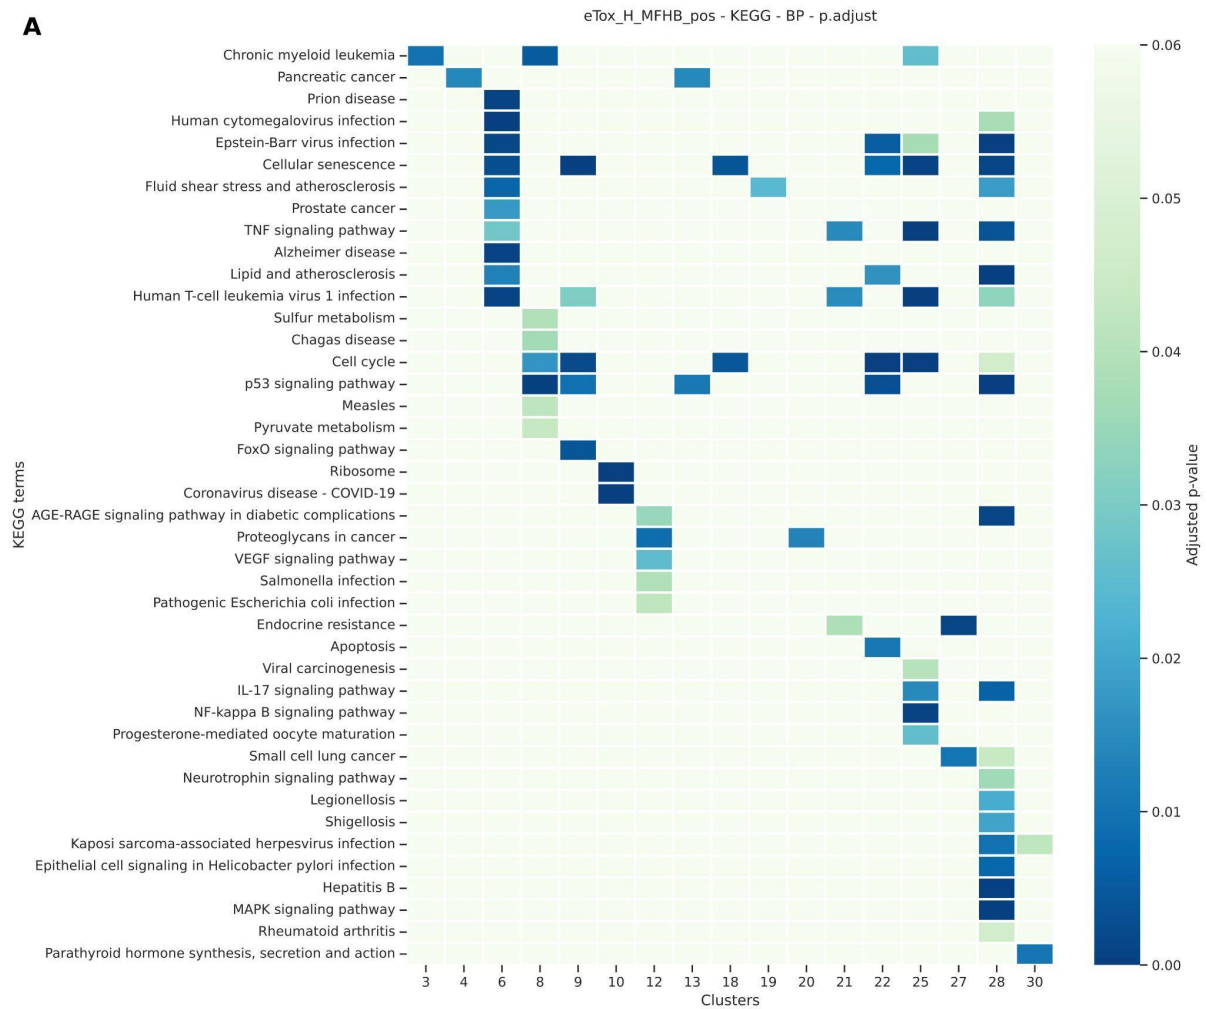

B

FBX\_H\_MFHHS\_pos + CID - RP - p.419,47

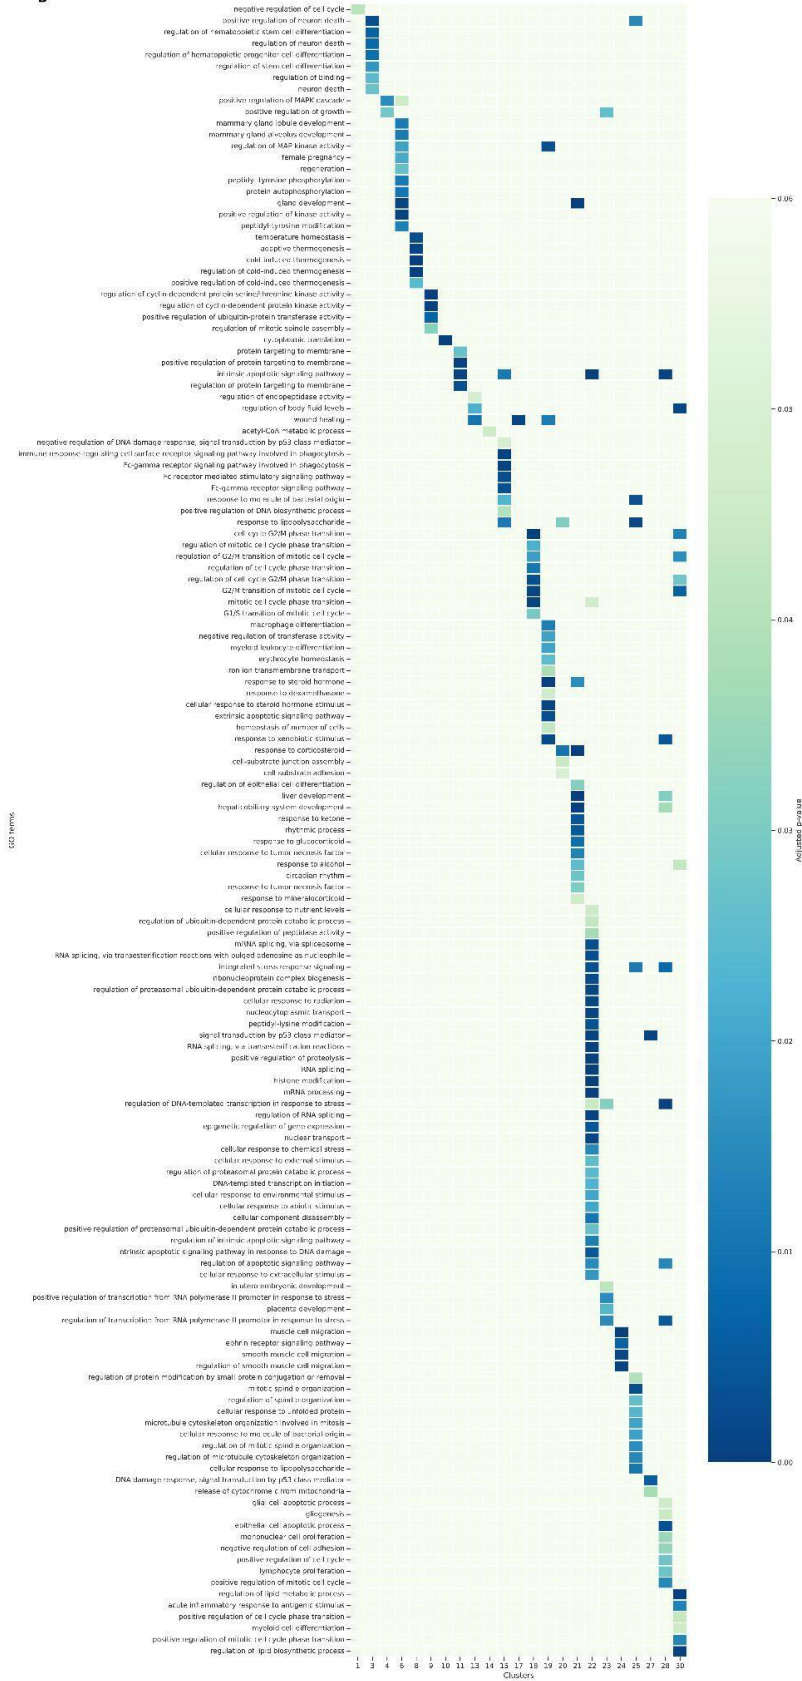

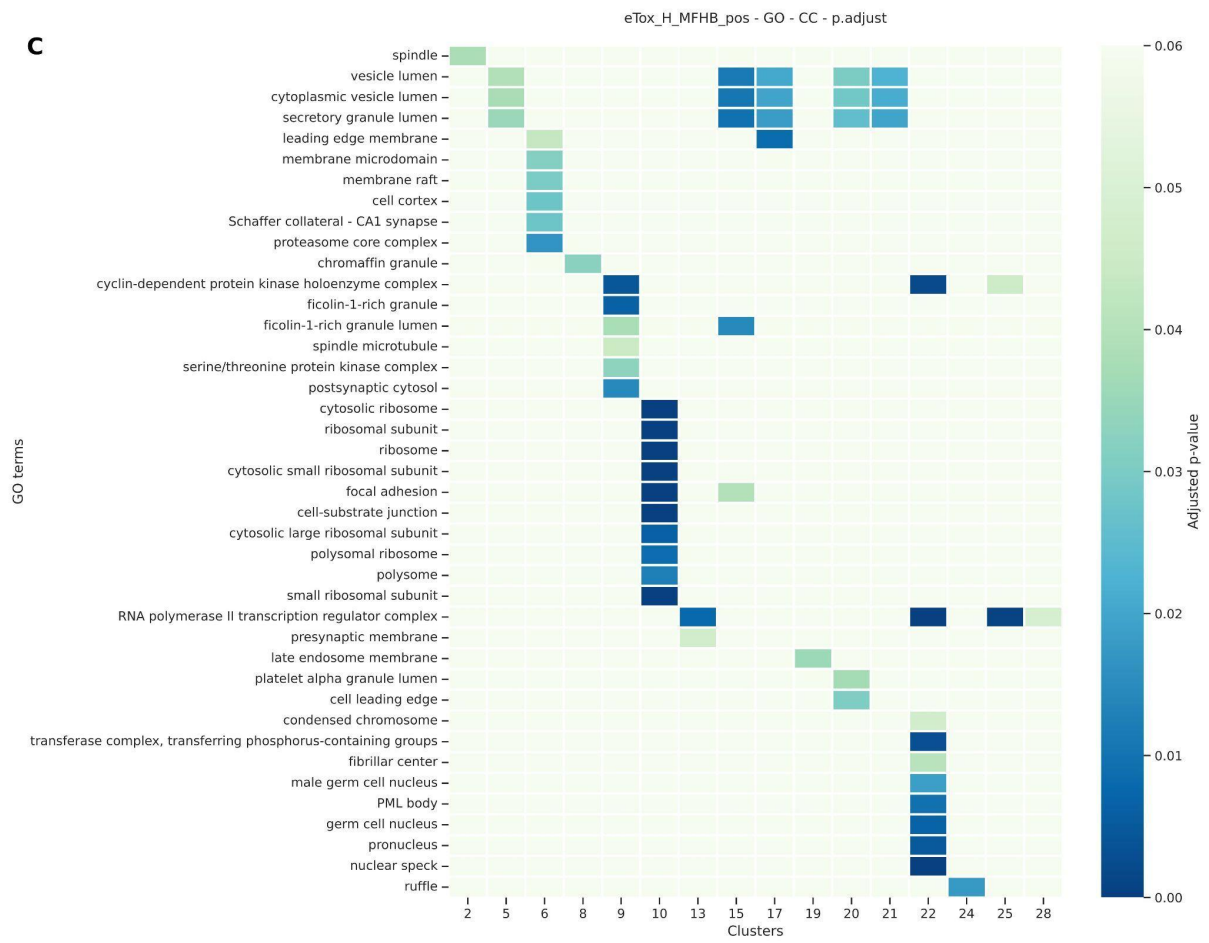



**Figure S12.** Heatmaps of pathways significantly deregulated by the randomly created clusters of hepatotoxic compounds from the CP\_eTox\_H\_MFHC dataset. A. KEGG pathway analysis. B. GO BP pathway analysis. C. GO CC pathway analysis. Color scale is related to p-value. P-values equal or above 0.05 are in light green.

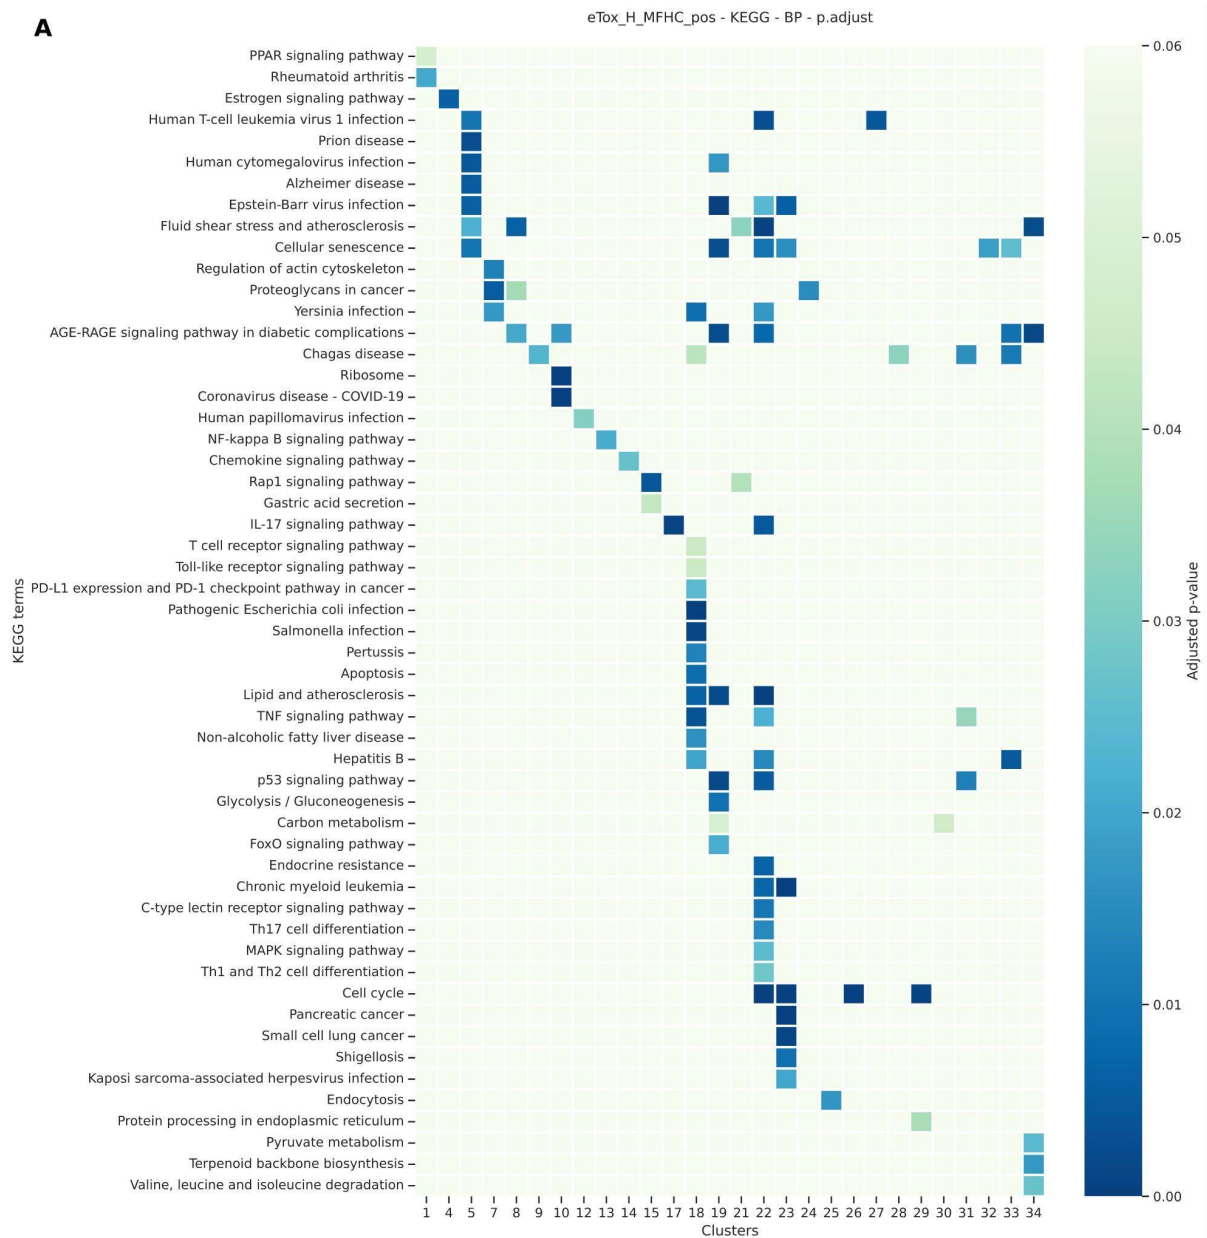

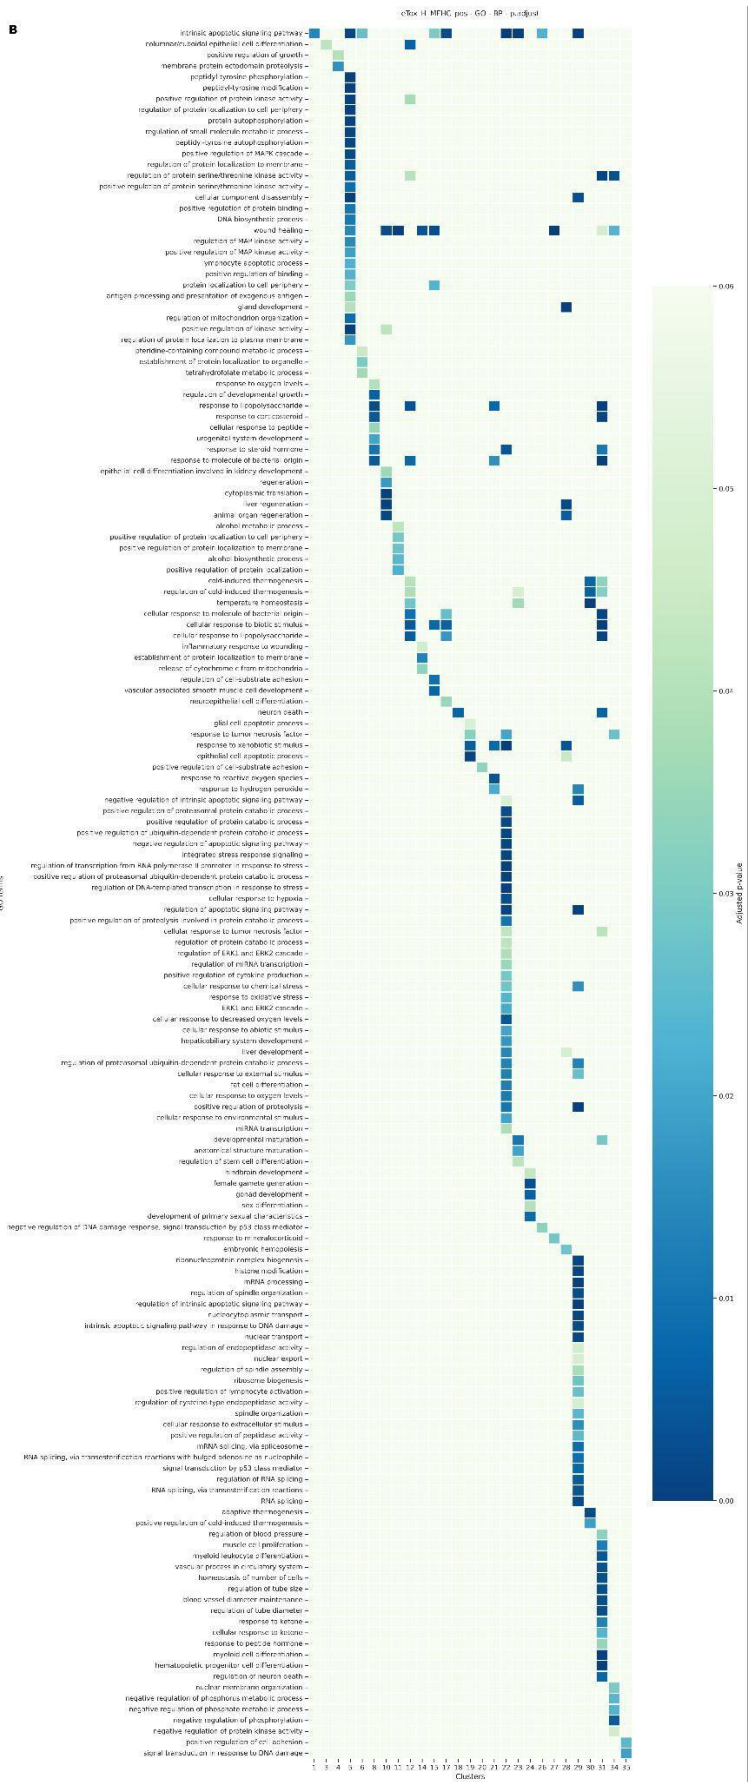

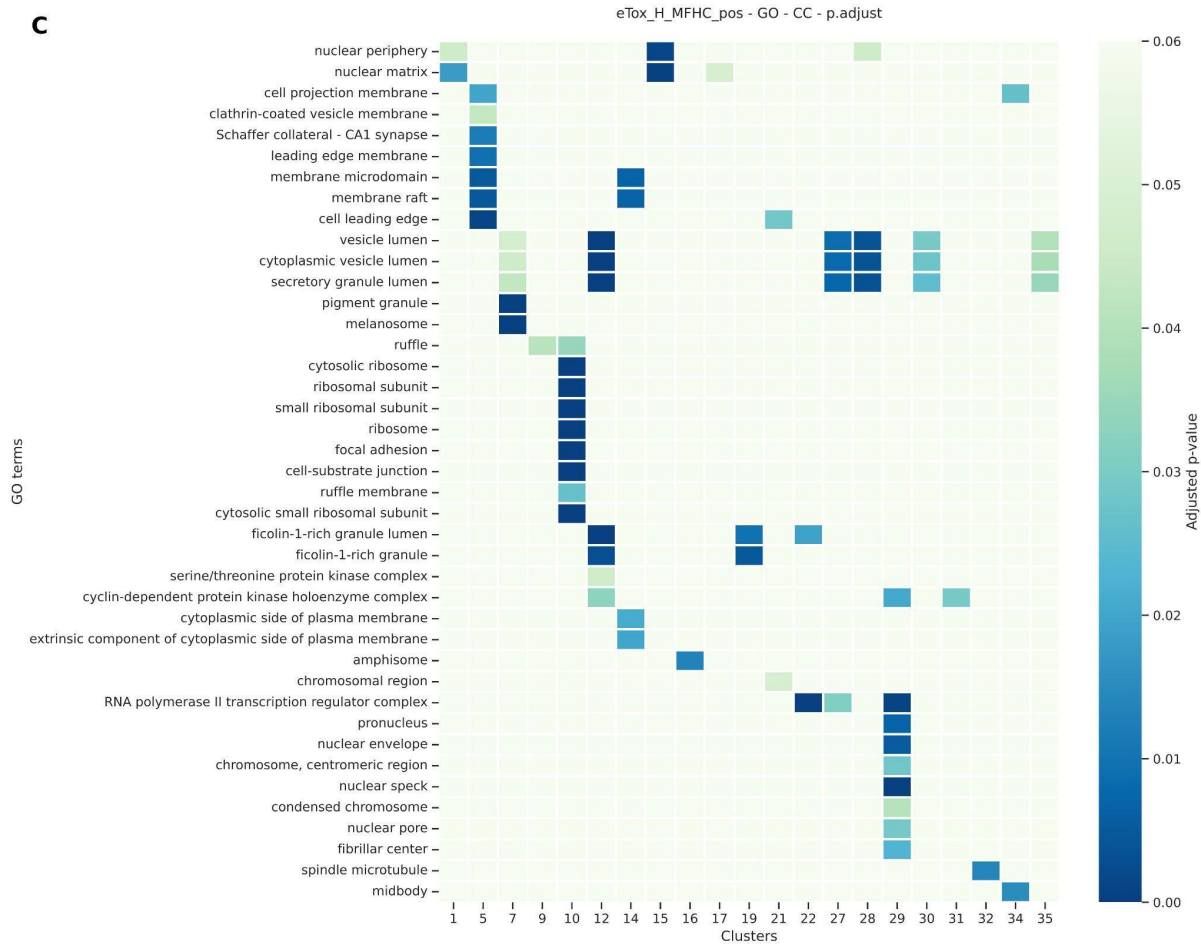

## Supplementary Tables

**Table S1.** DILrank and eTox compounds annotations (*see XLSX file*).

**Table S2.** Details of model parameters. Basic parameters describe parameters that are fixed and not included in the hyperparameter tuning.

| Model         | Basic parameters                                                                                             | Grid Search parameters                                                                                                     |
|---------------|--------------------------------------------------------------------------------------------------------------|----------------------------------------------------------------------------------------------------------------------------|
| Random Forest | random_state = 1<br>criterion = 'gini'<br>class_weight = 'balanced'<br>n_jobs = -1                           | n_estimators: [100, 300, 500,<br>800, 1000]<br>max_depth: [None, 5, 10, 20,<br>50]                                         |
| Linear SVM    | random_state = 1<br>class_weight = 'balanced'                                                                | penalty: ['l1', 'l2']<br>multi_class: ['ovr',<br>'crammer_singer']<br>max_iter: [1000, 2000, 4000]<br>dual = [True, False] |
| ElasticNet    | random_state = 1<br>class_weight = 'balanced'<br>penalty = 'elasticnet'<br>solver = 'saga'<br>l1_ratio = 0.2 | l1_ratio: [0.1, 0.12, 0.14, 0.16,<br>0.2, 0.3, 0.4, 0.5, 0.7, 0.8, 0.9]<br>max_iter: [100, 50, 1000, 2000]                 |

**Table S3.** Metrics formulas. Model efficiency was measured with balanced accuracy (BA), specificity (SP) and sensitivity (SN) metrics. 4 cases of prediction exist: True Positive (TP; Real positive predicted as such), False Positive (FP; Real negative predicted as positive), True Negative (TN; Real negative predicted as such), False Negative (FN; Real positive predicted as negative).

| Metric  | BA                       | SN                        | SP                        |
|---------|--------------------------|---------------------------|---------------------------|
| Formula | $BA = \frac{SN + SP}{2}$ | $SN = \frac{TN}{TN + FP}$ | $SP = \frac{TP}{TP + FN}$ |

**Table S4.** Lists of selected features after feature selection.

| Dataset          | Compartment | Selected features                                                                                                                                                                                                                                                                                                                                                                                                                                         |
|------------------|-------------|-----------------------------------------------------------------------------------------------------------------------------------------------------------------------------------------------------------------------------------------------------------------------------------------------------------------------------------------------------------------------------------------------------------------------------------------------------------|
| CP_DILIs_pos_neg | Cells       | Cells_AreaShape_MeanRadius<br>Cells_AreaShape_MedianRadius<br>Cells_AreaShape_MinFeretDiameter<br>Cells_AreaShape_MinorAxisLength<br>Cells_Correlation_Costes_DNA_Mito<br>Cells_Correlation_Costes_DNA_RNA<br>Cells_Correlation_K_ER_AGP<br>Cells_Correlation_RWC_ER_Mito<br>Cells_Correlation_RWC_Mito_RNA<br>Cells_Correlation_RWC_RNA_Mito<br>Cells_Granularity_15_ER<br>Cells_Granularity_2_AGP<br>Cells_Granularity_2_ER<br>Cells_Granularity_2_Mito |

|  |  |                                                                                                                                                                                                                                                                                                                                                                                                                                                                                                                                                                                                                                                                                                                                                                                                                                                                                                                                                                                                                                                                                                                    |
|--|--|--------------------------------------------------------------------------------------------------------------------------------------------------------------------------------------------------------------------------------------------------------------------------------------------------------------------------------------------------------------------------------------------------------------------------------------------------------------------------------------------------------------------------------------------------------------------------------------------------------------------------------------------------------------------------------------------------------------------------------------------------------------------------------------------------------------------------------------------------------------------------------------------------------------------------------------------------------------------------------------------------------------------------------------------------------------------------------------------------------------------|
|  |  | Cells_Granularity_2_RNA<br>Cells_Granularity_3_ER<br>Cells_Intensity_LowerQuartileIntensity_ER<br>Cells_Texture_AngularSecondMoment_AGP_10_0<br>Cells_Texture_AngularSecondMoment_AGP_3_0<br>Cells_Texture_AngularSecondMoment_AGP_5_0<br>Cells_Texture_AngularSecondMoment_DNA_3_0<br>Cells_Texture_Contrast_AGP_10_0<br>Cells_Texture_Contrast_AGP_3_0<br>Cells_Texture_Contrast_AGP_5_0<br>Cells_Texture_Contrast_DNA_10_0<br>Cells_Texture_Contrast_DNA_3_0<br>Cells_Texture_Contrast_DNA_5_0<br>Cells_Texture_Contrast_ER_10_0<br>Cells_Texture_Contrast_ER_5_0<br>Cells_Texture_Contrast_Mito_10_0<br>Cells_Texture_Contrast_Mito_3_0<br>Cells_Texture_Contrast_Mito_5_0<br>Cells_Texture_Contrast_RNA_3_0<br>Cells_Texture_Contrast_RNA_5_0<br>Cells_Texture_Correlation_DNA_10_0<br>Cells_Texture_Correlation_Mito_10_0<br>Cells_Texture_Correlation_Mito_3_0<br>Cells_Texture_Correlation_Mito_5_0<br>Cells_Texture_Correlation_RNA_10_0<br>Cells_Texture_Correlation_RNA_3_0<br>Cells_Texture_Correlation_RNA_5_0<br>Cells_Texture_DifferenceEntropy_AGP_10_0<br>Cells_Texture_DifferenceEntropy_AGP_5_0 |
|--|--|--------------------------------------------------------------------------------------------------------------------------------------------------------------------------------------------------------------------------------------------------------------------------------------------------------------------------------------------------------------------------------------------------------------------------------------------------------------------------------------------------------------------------------------------------------------------------------------------------------------------------------------------------------------------------------------------------------------------------------------------------------------------------------------------------------------------------------------------------------------------------------------------------------------------------------------------------------------------------------------------------------------------------------------------------------------------------------------------------------------------|

|  |  |                                                                                                                                                                                                                                                                                                                                                                                                                                                                                                                                                                                                                                                                                                                                                                                                                                                                                                                                                                                                                                                                                                                                                                                                       |
|--|--|-------------------------------------------------------------------------------------------------------------------------------------------------------------------------------------------------------------------------------------------------------------------------------------------------------------------------------------------------------------------------------------------------------------------------------------------------------------------------------------------------------------------------------------------------------------------------------------------------------------------------------------------------------------------------------------------------------------------------------------------------------------------------------------------------------------------------------------------------------------------------------------------------------------------------------------------------------------------------------------------------------------------------------------------------------------------------------------------------------------------------------------------------------------------------------------------------------|
|  |  | Cells_Texture_DifferenceEntropy_DNA_3_0<br>Cells_Texture_DifferenceEntropy_DNA_5_0<br>Cells_Texture_DifferenceEntropy_ER_5_0<br>Cells_Texture_DifferenceEntropy_Mito_10_0<br>Cells_Texture_DifferenceEntropy_Mito_3_0<br>Cells_Texture_DifferenceEntropy_Mito_5_0<br>Cells_Texture_DifferenceEntropy_RNA_3_0<br>Cells_Texture_DifferenceEntropy_RNA_5_0<br>Cells_Texture_DifferenceVariance_AGP_10_0<br>Cells_Texture_DifferenceVariance_AGP_5_0<br>Cells_Texture_DifferenceVariance_DNA_10_0<br>Cells_Texture_DifferenceVariance_DNA_5_0<br>Cells_Texture_DifferenceVariance_ER_10_0<br>Cells_Texture_DifferenceVariance_ER_5_0<br>Cells_Texture_DifferenceVariance_Mito_10_0<br>Cells_Texture_DifferenceVariance_Mito_3_0<br>Cells_Texture_DifferenceVariance_Mito_5_0<br>Cells_Texture_DifferenceVariance_RNA_3_0<br>Cells_Texture_DifferenceVariance_RNA_5_0<br>Cells_Texture_Entropy_AGP_10_0<br>Cells_Texture_Entropy_AGP_3_0<br>Cells_Texture_Entropy_AGP_5_0<br>Cells_Texture_Entropy_DNA_3_0<br>Cells_Texture_Gabor_AGP_10<br>Cells_Texture_Gabor_DNA_10<br>Cells_Texture_Gabor_Mito_10<br>Cells_Texture_Gabor_RNA_10<br>Cells_Texture_InfoMeas1_Mito_5_0<br>Cells_Texture_InfoMeas1_RNA_3_0 |
|--|--|-------------------------------------------------------------------------------------------------------------------------------------------------------------------------------------------------------------------------------------------------------------------------------------------------------------------------------------------------------------------------------------------------------------------------------------------------------------------------------------------------------------------------------------------------------------------------------------------------------------------------------------------------------------------------------------------------------------------------------------------------------------------------------------------------------------------------------------------------------------------------------------------------------------------------------------------------------------------------------------------------------------------------------------------------------------------------------------------------------------------------------------------------------------------------------------------------------|

|  |           |                                                                                                                                                                                                                                                                                                                                                                                                                                                                                                                                                                                                                                                                                                                                                                                                                                                                                                                                                                                |
|--|-----------|--------------------------------------------------------------------------------------------------------------------------------------------------------------------------------------------------------------------------------------------------------------------------------------------------------------------------------------------------------------------------------------------------------------------------------------------------------------------------------------------------------------------------------------------------------------------------------------------------------------------------------------------------------------------------------------------------------------------------------------------------------------------------------------------------------------------------------------------------------------------------------------------------------------------------------------------------------------------------------|
|  |           | <p>Cells_Texture_InfoMeas1_RNA_5_0</p> <p>Cells_Texture_InfoMeas2_Mito_3_0</p> <p>Cells_Texture_InfoMeas2_Mito_5_0</p> <p>Cells_Texture_InfoMeas2_RNA_10_0</p> <p>Cells_Texture_InfoMeas2_RNA_3_0</p> <p>Cells_Texture_InfoMeas2_RNA_5_0</p> <p>Cells_Texture_InverseDifferenceMoment_AGP_10_0</p> <p>Cells_Texture_InverseDifferenceMoment_AGP_3_0</p> <p>Cells_Texture_InverseDifferenceMoment_AGP_5_0</p> <p>Cells_Texture_InverseDifferenceMoment_DNA_3_0</p> <p>Cells_Texture_InverseDifferenceMoment_DNA_5_0</p> <p>Cells_Texture_InverseDifferenceMoment_Mito_3_0</p> <p>Cells_Texture_InverseDifferenceMoment_RNA_3_0</p> <p>Cells_Texture_InverseDifferenceMoment_RNA_5_0</p> <p>Cells_Texture_SumAverage_DNA_3_0</p> <p>Cells_Texture_SumEntropy_AGP_3_0</p> <p>Cells_Texture_SumVariance_AGP_3_0,</p> <p>Cells_Texture_SumVariance_Mito_10_0</p> <p>Cells_Texture_Variance_AGP_10_0</p> <p>Cells_Texture_Variance_AGP_3_0</p> <p>Cells_Texture_Variance_AGP_5_0</p> |
|  | Cytoplasm | <p>Cytoplasm_AreaShape_MinFeretDiameter</p> <p>Cytoplasm_AreaShape_MinorAxisLength</p> <p>Cytoplasm_Correlation_Correlation_Mito_RNA</p> <p>Cytoplasm_Correlation_Costes_DNA_Mito</p> <p>Cytoplasm_Correlation_Costes_DNA_RNA</p> <p>Cytoplasm_Correlation_Overlap_DNA_ER</p> <p>Cytoplasm_Correlation_Overlap_DNA_Mito</p> <p>Cytoplasm_Correlation_RWC_DNA_Mito</p>                                                                                                                                                                                                                                                                                                                                                                                                                                                                                                                                                                                                          |



|  |  |                                                                                                                                                                                                                                                                                                                                                                                                                                                                                                                                                                                                                                                                                                                                                                                                                                                                                                                                                                                                                                                                                                                                                                                                                                                                  |
|--|--|------------------------------------------------------------------------------------------------------------------------------------------------------------------------------------------------------------------------------------------------------------------------------------------------------------------------------------------------------------------------------------------------------------------------------------------------------------------------------------------------------------------------------------------------------------------------------------------------------------------------------------------------------------------------------------------------------------------------------------------------------------------------------------------------------------------------------------------------------------------------------------------------------------------------------------------------------------------------------------------------------------------------------------------------------------------------------------------------------------------------------------------------------------------------------------------------------------------------------------------------------------------|
|  |  | <p>Cytoplasm_Correlation_RWC_Mito_DNA</p> <p>Cytoplasm_Correlation_RWC_Mito_RNA</p> <p>Cytoplasm_Correlation_RWC_RNA_DNA</p> <p>Cytoplasm_Correlation_RWC_RNA_Mito</p> <p>Cytoplasm_Granularity_15_ER</p> <p>Cytoplasm_Granularity_2_AGP</p> <p>Cytoplasm_Granularity_2_ER</p> <p>Cytoplasm_Granularity_2_Mito</p> <p>Cytoplasm_Granularity_2_RNA</p> <p>Cytoplasm_Granularity_3_ER</p> <p>Cytoplasm_Granularity_3_Mito</p> <p>Cytoplasm_Granularity_3_RNA</p> <p>Cytoplasm_Texture_AngularSecondMoment_AGP_3_0</p> <p>Cytoplasm_Texture_AngularSecondMoment_AGP_5_0</p> <p>Cytoplasm_Texture_Contrast_AGP_10_0</p> <p>Cytoplasm_Texture_Contrast_AGP_3_0</p> <p>Cytoplasm_Texture_Contrast_AGP_5_0</p> <p>Cytoplasm_Texture_Contrast_DNA_10_0</p> <p>Cytoplasm_Texture_Contrast_DNA_3_0</p> <p>Cytoplasm_Texture_Contrast_DNA_5_0</p> <p>Cytoplasm_Texture_Contrast_ER_10_0</p> <p>Cytoplasm_Texture_Contrast_Mito_10_0</p> <p>Cytoplasm_Texture_Contrast_Mito_3_0</p> <p>Cytoplasm_Texture_Contrast_Mito_5_0</p> <p>Cytoplasm_Texture_Contrast_RNA_3_0</p> <p>Cytoplasm_Texture_Contrast_RNA_5_0</p> <p>Cytoplasm_Texture_DifferenceEntropy_AGP_10_0</p> <p>Cytoplasm_Texture_DifferenceEntropy_AGP_5_0</p> <p>Cytoplasm_Texture_DifferenceEntropy_ER_10_0</p> |
|--|--|------------------------------------------------------------------------------------------------------------------------------------------------------------------------------------------------------------------------------------------------------------------------------------------------------------------------------------------------------------------------------------------------------------------------------------------------------------------------------------------------------------------------------------------------------------------------------------------------------------------------------------------------------------------------------------------------------------------------------------------------------------------------------------------------------------------------------------------------------------------------------------------------------------------------------------------------------------------------------------------------------------------------------------------------------------------------------------------------------------------------------------------------------------------------------------------------------------------------------------------------------------------|

|  |  |                                                                                                                                                                                                                                                                                                                                                                                                                                                                                                                                                                                                                                                                                                                                                                                                                                                                                                                                                                                                                                                                                                                                                                                                                                                                                                                                                                      |
|--|--|----------------------------------------------------------------------------------------------------------------------------------------------------------------------------------------------------------------------------------------------------------------------------------------------------------------------------------------------------------------------------------------------------------------------------------------------------------------------------------------------------------------------------------------------------------------------------------------------------------------------------------------------------------------------------------------------------------------------------------------------------------------------------------------------------------------------------------------------------------------------------------------------------------------------------------------------------------------------------------------------------------------------------------------------------------------------------------------------------------------------------------------------------------------------------------------------------------------------------------------------------------------------------------------------------------------------------------------------------------------------|
|  |  | <p> Cytoplasm_Texture_DifferenceEntropy_Mito_10_0<br/> Cytoplasm_Texture_DifferenceEntropy_Mito_5_0<br/> Cytoplasm_Texture_DifferenceEntropy_RNA_3_0<br/> Cytoplasm_Texture_DifferenceEntropy_RNA_5_0<br/> Cytoplasm_Texture_DifferenceVariance_AGP_10_0<br/> Cytoplasm_Texture_DifferenceVariance_DNA_10_0<br/> Cytoplasm_Texture_DifferenceVariance_DNA_3_0<br/> Cytoplasm_Texture_DifferenceVariance_DNA_5_0<br/> Cytoplasm_Texture_DifferenceVariance_ER_10_0<br/> Cytoplasm_Texture_DifferenceVariance_Mito_10_0<br/> Cytoplasm_Texture_DifferenceVariance_Mito_3_0<br/> Cytoplasm_Texture_DifferenceVariance_Mito_5_0<br/> Cytoplasm_Texture_DifferenceVariance_RNA_3_0<br/> Cytoplasm_Texture_DifferenceVariance_RNA_5_0<br/> Cytoplasm_Texture_Entropy_AGP_3_0<br/> Cytoplasm_Texture_Entropy_AGP_5_0<br/> Cytoplasm_Texture_Entropy_RNA_3_0<br/> Cytoplasm_Texture_Entropy_RNA_5_0<br/> Cytoplasm_Texture_Gabor_AGP_10<br/> Cytoplasm_Texture_Gabor_DNA_10<br/> Cytoplasm_Texture_Gabor_DNA_3<br/> Cytoplasm_Texture_Gabor_DNA_5<br/> Cytoplasm_Texture_Gabor_ER_10<br/> Cytoplasm_Texture_Gabor_Mito_10<br/> Cytoplasm_Texture_Gabor_Mito_5<br/> Cytoplasm_Texture_Gabor_RNA_10<br/> Cytoplasm_Texture_InverseDifferenceMoment_AGP_10_0<br/> Cytoplasm_Texture_InverseDifferenceMoment_AGP_3_0<br/> Cytoplasm_Texture_InverseDifferenceMoment_AGP_5_0 </p> |
|--|--|----------------------------------------------------------------------------------------------------------------------------------------------------------------------------------------------------------------------------------------------------------------------------------------------------------------------------------------------------------------------------------------------------------------------------------------------------------------------------------------------------------------------------------------------------------------------------------------------------------------------------------------------------------------------------------------------------------------------------------------------------------------------------------------------------------------------------------------------------------------------------------------------------------------------------------------------------------------------------------------------------------------------------------------------------------------------------------------------------------------------------------------------------------------------------------------------------------------------------------------------------------------------------------------------------------------------------------------------------------------------|

|  |        |                                                                                                                                                                                                                                                                                                                                                                                                                                                                                                                                                                                                                                                                                                                                                                                                                                                                                                                                                              |
|--|--------|--------------------------------------------------------------------------------------------------------------------------------------------------------------------------------------------------------------------------------------------------------------------------------------------------------------------------------------------------------------------------------------------------------------------------------------------------------------------------------------------------------------------------------------------------------------------------------------------------------------------------------------------------------------------------------------------------------------------------------------------------------------------------------------------------------------------------------------------------------------------------------------------------------------------------------------------------------------|
|  |        | <p>Cytoplasm_Texture_InverseDifferenceMoment_Mito_3_0</p> <p>Cytoplasm_Texture_InverseDifferenceMoment_Mito_5_0</p> <p>Cytoplasm_Texture_InverseDifferenceMoment_RNA_3_0</p> <p>Cytoplasm_Texture_InverseDifferenceMoment_RNA_5_0</p> <p>Cytoplasm_Texture_SumEntropy_AGP_3_0</p> <p>Cytoplasm_Texture_SumVariance_AGP_10_0</p> <p>Cytoplasm_Texture_SumVariance_AGP_3_0</p> <p>Cytoplasm_Texture_SumVariance_AGP_5_0</p> <p>Cytoplasm_Texture_SumVariance_DNA_10_0</p> <p>Cytoplasm_Texture_SumVariance_ER_10_0</p> <p>Cytoplasm_Texture_SumVariance_ER_3_0</p> <p>Cytoplasm_Texture_SumVariance_ER_5_0</p> <p>Cytoplasm_Texture_Variance_AGP_10_0</p> <p>Cytoplasm_Texture_Variance_AGP_3_0</p> <p>Cytoplasm_Texture_Variance_AGP_5_0</p> <p>Cytoplasm_Texture_Variance_DNA_10_0</p> <p>Cytoplasm_Texture_Variance_DNA_5_0</p> <p>Cytoplasm_Texture_Variance_ER_10_0</p> <p>Cytoplasm_Texture_Variance_ER_3_0</p> <p>Cytoplasm_Texture_Variance_ER_5_0</p> |
|  | Nuclei | <p>Nuclei_AreaShape_Compactness</p> <p>Nuclei_AreaShape_MaximumRadius</p> <p>Nuclei_AreaShape_Zernike_0_0</p> <p>Nuclei_Correlation_Costes_DNA_Mito</p> <p>Nuclei_Correlation_Costes_DNA_RNA</p> <p>Nuclei_Correlation_Overlap_Mito_AGP</p> <p>Nuclei_Granularity_13_ER</p> <p>Nuclei_Granularity_2_DNA</p> <p>Nuclei_Granularity_2_ER</p>                                                                                                                                                                                                                                                                                                                                                                                                                                                                                                                                                                                                                   |

|  |  |                                                                                                                                                                                                                                                                                                                                                                                                                                                                                                                                                                                                                                                                                                                                                                                                                                                                                                                                                                                                                                                                                                                                                                                                                                                                                                                |
|--|--|----------------------------------------------------------------------------------------------------------------------------------------------------------------------------------------------------------------------------------------------------------------------------------------------------------------------------------------------------------------------------------------------------------------------------------------------------------------------------------------------------------------------------------------------------------------------------------------------------------------------------------------------------------------------------------------------------------------------------------------------------------------------------------------------------------------------------------------------------------------------------------------------------------------------------------------------------------------------------------------------------------------------------------------------------------------------------------------------------------------------------------------------------------------------------------------------------------------------------------------------------------------------------------------------------------------|
|  |  | <p>Nuclei_RadialDistribution_FracAtD_ER_4of4</p> <p>Nuclei_RadialDistribution_RadialCV_RNA_3of4</p> <p>Nuclei_Texture_AngularSecondMoment_DNA_3_0</p> <p>Nuclei_Texture_Contrast_AGP_5_0</p> <p>Nuclei_Texture_Contrast_DNA_10_0</p> <p>Nuclei_Texture_Contrast_DNA_3_0</p> <p>Nuclei_Texture_Contrast_DNA_5_0</p> <p>Nuclei_Texture_Contrast_RNA_5_0</p> <p>Nuclei_Texture_Correlation_DNA_10_0</p> <p>Nuclei_Texture_DifferenceEntropy_AGP_5_0</p> <p>Nuclei_Texture_DifferenceEntropy_DNA_10_0</p> <p>Nuclei_Texture_DifferenceEntropy_DNA_3_0</p> <p>Nuclei_Texture_DifferenceEntropy_DNA_5_0</p> <p>Nuclei_Texture_DifferenceVariance_AGP_5_0</p> <p>Nuclei_Texture_DifferenceVariance_DNA_10_0</p> <p>Nuclei_Texture_DifferenceVariance_DNA_3_0</p> <p>Nuclei_Texture_DifferenceVariance_DNA_5_0</p> <p>Nuclei_Texture_DifferenceVariance_Mito_5_0</p> <p>Nuclei_Texture_Entropy_DNA_3_0</p> <p>Nuclei_Texture_Entropy_RNA_3_0</p> <p>Nuclei_Texture_Gabor_AGP_10</p> <p>Nuclei_Texture_Gabor_DNA_10</p> <p>Nuclei_Texture_Gabor_Mito_10</p> <p>Nuclei_Texture_Gabor_RNA_10</p> <p>Nuclei_Texture_InfoMeas1_DNA_10_0</p> <p>Nuclei_Texture_InfoMeas1_ER_10_0</p> <p>Nuclei_Texture_InfoMeas2_DNA_10_0</p> <p>Nuclei_Texture_InfoMeas2_ER_10_0</p> <p>Nuclei_Texture_InverseDifferenceMoment_DNA_10_0</p> |
|--|--|----------------------------------------------------------------------------------------------------------------------------------------------------------------------------------------------------------------------------------------------------------------------------------------------------------------------------------------------------------------------------------------------------------------------------------------------------------------------------------------------------------------------------------------------------------------------------------------------------------------------------------------------------------------------------------------------------------------------------------------------------------------------------------------------------------------------------------------------------------------------------------------------------------------------------------------------------------------------------------------------------------------------------------------------------------------------------------------------------------------------------------------------------------------------------------------------------------------------------------------------------------------------------------------------------------------|

|                   |       |                                                                                                                                                                                                                                                                                                                                                                                                                                                                                                                                                                                                                                                                                                                                                                                                                                                                                                                                                                                                                            |
|-------------------|-------|----------------------------------------------------------------------------------------------------------------------------------------------------------------------------------------------------------------------------------------------------------------------------------------------------------------------------------------------------------------------------------------------------------------------------------------------------------------------------------------------------------------------------------------------------------------------------------------------------------------------------------------------------------------------------------------------------------------------------------------------------------------------------------------------------------------------------------------------------------------------------------------------------------------------------------------------------------------------------------------------------------------------------|
|                   |       | <p>Nuclei_Texture_InverseDifferenceMoment_DNA_3_0</p> <p>Nuclei_Texture_InverseDifferenceMoment_DNA_5_0</p> <p>Nuclei_Texture_InverseDifferenceMoment_RNA_3_0</p> <p>Nuclei_Texture_InverseDifferenceMoment_RNA_5_0</p>                                                                                                                                                                                                                                                                                                                                                                                                                                                                                                                                                                                                                                                                                                                                                                                                    |
| CP_DILIs_most_neg | Cells | <p>Cells_AreaShape_Area</p> <p>Cells_AreaShape_MaximumRadius</p> <p>Cells_AreaShape_MeanRadius</p> <p>Cells_AreaShape_MedianRadius</p> <p>Cells_AreaShape_MinFerretDiameter</p> <p>Cells_AreaShape_MinorAxisLength</p> <p>Cells_Correlation_Correlation_Mito_ER</p> <p>Cells_Correlation_Costes_DNA_Mito</p> <p>Cells_Correlation_Costes_DNA_RNA</p> <p>Cells_Correlation_K_ER_RNA</p> <p>Cells_Correlation_RWC_DNA_Mito</p> <p>Cells_Correlation_RWC_ER_Mito</p> <p>Cells_Correlation_RWC_ER_RNA</p> <p>Cells_Correlation_RWC_Mito_ER</p> <p>Cells_Correlation_RWC_Mito_RNA</p> <p>Cells_Correlation_RWC_RNA_Mito</p> <p>Cells_Granularity_15_ER</p> <p>Cells_Intensity_LowerQuartileIntensity_ER</p> <p>Cells_Intensity_LowerQuartileIntensity_RNA</p> <p>Cells_Intensity_MassDisplacement_RNA</p> <p>Cells_Intensity_MaxIntensityEdge_DNA</p> <p>Cells_Intensity_MeanIntensityEdge_ER</p> <p>Cells_Intensity_MinIntensityEdge_ER</p> <p>Cells_Intensity_MinIntensityEdge_RNA</p> <p>Cells_Intensity_MinIntensity_ER</p> |

|  |  |                                                                                                                                                                                                                                                                                                                                                                                                                                                                                                                                                                                                                                                                                                                                                                                                                                                                                                                                                                                                                                                                                                                                                                                                     |
|--|--|-----------------------------------------------------------------------------------------------------------------------------------------------------------------------------------------------------------------------------------------------------------------------------------------------------------------------------------------------------------------------------------------------------------------------------------------------------------------------------------------------------------------------------------------------------------------------------------------------------------------------------------------------------------------------------------------------------------------------------------------------------------------------------------------------------------------------------------------------------------------------------------------------------------------------------------------------------------------------------------------------------------------------------------------------------------------------------------------------------------------------------------------------------------------------------------------------------|
|  |  | Cells_Intensity_MinIntensity_RNA<br>Cells_Intensity_StdIntensityEdge_DNA<br>Cells_Intensity_UpperQuartileIntensity_DNA<br>Cells_RadialDistribution_RadialCV_DNA_1of4<br>Cells_RadialDistribution_RadialCV_DNA_2of4<br>Cells_Texture_AngularSecondMoment_AGP_3_0<br>Cells_Texture_AngularSecondMoment_AGP_5_0<br>Cells_Texture_AngularSecondMoment_DNA_10_0<br>Cells_Texture_AngularSecondMoment_DNA_3_0<br>Cells_Texture_AngularSecondMoment_DNA_5_0<br>Cells_Texture_Contrast_AGP_3_0<br>Cells_Texture_Contrast_DNA_10_0<br>Cells_Texture_Contrast_DNA_3_0<br>Cells_Texture_Contrast_DNA_5_0<br>Cells_Texture_Contrast_Mito_3_0<br>Cells_Texture_Contrast_Mito_5_0<br>Cells_Texture_Contrast_RNA_3_0<br>Cells_Texture_Contrast_RNA_5_0<br>Cells_Texture_Correlation_Mito_10_0<br>Cells_Texture_Correlation_Mito_3_0<br>Cells_Texture_Correlation_Mito_5_0<br>Cells_Texture_Correlation_RNA_10_0<br>Cells_Texture_Correlation_RNA_3_0<br>Cells_Texture_Correlation_RNA_5_0<br>Cells_Texture_DifferenceEntropy_AGP_10_0<br>Cells_Texture_DifferenceEntropy_AGP_3_0<br>Cells_Texture_DifferenceEntropy_AGP_5_0<br>Cells_Texture_DifferenceEntropy_DNA_10_0<br>Cells_Texture_DifferenceEntropy_DNA_3_0 |
|--|--|-----------------------------------------------------------------------------------------------------------------------------------------------------------------------------------------------------------------------------------------------------------------------------------------------------------------------------------------------------------------------------------------------------------------------------------------------------------------------------------------------------------------------------------------------------------------------------------------------------------------------------------------------------------------------------------------------------------------------------------------------------------------------------------------------------------------------------------------------------------------------------------------------------------------------------------------------------------------------------------------------------------------------------------------------------------------------------------------------------------------------------------------------------------------------------------------------------|

|  |  |                                                                                                                                                                                                                                                                                                                                                                                                                                                                                                                                                                                                                                                                                                                                                                                                                                                                                                                                                                                                                                                                                                                                 |
|--|--|---------------------------------------------------------------------------------------------------------------------------------------------------------------------------------------------------------------------------------------------------------------------------------------------------------------------------------------------------------------------------------------------------------------------------------------------------------------------------------------------------------------------------------------------------------------------------------------------------------------------------------------------------------------------------------------------------------------------------------------------------------------------------------------------------------------------------------------------------------------------------------------------------------------------------------------------------------------------------------------------------------------------------------------------------------------------------------------------------------------------------------|
|  |  | Cells_Texture_DifferenceEntropy_DNA_5_0<br>Cells_Texture_DifferenceEntropy_Mito_3_0<br>Cells_Texture_DifferenceEntropy_Mito_5_0<br>Cells_Texture_DifferenceEntropy_RNA_10_0<br>Cells_Texture_DifferenceEntropy_RNA_3_0<br>Cells_Texture_DifferenceEntropy_RNA_5_0<br>Cells_Texture_DifferenceVariance_AGP_5_0<br>Cells_Texture_DifferenceVariance_ER_10_0<br>Cells_Texture_DifferenceVariance_Mito_3_0<br>Cells_Texture_DifferenceVariance_Mito_5_0<br>Cells_Texture_DifferenceVariance_RNA_3_0<br>Cells_Texture_DifferenceVariance_RNA_5_0<br>Cells_Texture_Entropy_AGP_10_0<br>Cells_Texture_Entropy_AGP_3_0<br>Cells_Texture_Entropy_AGP_5_0<br>Cells_Texture_Entropy_DNA_10_0<br>Cells_Texture_Entropy_DNA_3_0<br>Cells_Texture_Entropy_DNA_5_0<br>Cells_Texture_Gabor_Mito_10<br>Cells_Texture_Gabor_Mito_3<br>Cells_Texture_Gabor_RNA_10<br>Cells_Texture_Gabor_RNA_3<br>Cells_Texture_Gabor_RNA_5<br>Cells_Texture_InfoMeas1_Mito_10_0<br>Cells_Texture_InfoMeas1_Mito_3_0<br>Cells_Texture_InfoMeas1_Mito_5_0<br>Cells_Texture_InfoMeas1_RNA_10_0<br>Cells_Texture_InfoMeas1_RNA_3_0<br>Cells_Texture_InfoMeas1_RNA_5_0 |
|--|--|---------------------------------------------------------------------------------------------------------------------------------------------------------------------------------------------------------------------------------------------------------------------------------------------------------------------------------------------------------------------------------------------------------------------------------------------------------------------------------------------------------------------------------------------------------------------------------------------------------------------------------------------------------------------------------------------------------------------------------------------------------------------------------------------------------------------------------------------------------------------------------------------------------------------------------------------------------------------------------------------------------------------------------------------------------------------------------------------------------------------------------|

|  |           |                                                                                                                                                                                                                                                                                                                                                                                                                                                                                                                                                                                                                                                                                                                                                                                                                                                                                                                                                                                                                                                                                                                                                                               |
|--|-----------|-------------------------------------------------------------------------------------------------------------------------------------------------------------------------------------------------------------------------------------------------------------------------------------------------------------------------------------------------------------------------------------------------------------------------------------------------------------------------------------------------------------------------------------------------------------------------------------------------------------------------------------------------------------------------------------------------------------------------------------------------------------------------------------------------------------------------------------------------------------------------------------------------------------------------------------------------------------------------------------------------------------------------------------------------------------------------------------------------------------------------------------------------------------------------------|
|  |           | <p>Cells_Texture_InfoMeas2_Mito_10_0</p> <p>Cells_Texture_InfoMeas2_Mito_3_0</p> <p>Cells_Texture_InfoMeas2_Mito_5_0</p> <p>Cells_Texture_InfoMeas2_RNA_10_0</p> <p>Cells_Texture_InfoMeas2_RNA_3_0</p> <p>Cells_Texture_InfoMeas2_RNA_5_0</p> <p>Cells_Texture_InverseDifferenceMoment_AGP_10_0</p> <p>Cells_Texture_InverseDifferenceMoment_AGP_3_0</p> <p>Cells_Texture_InverseDifferenceMoment_AGP_5_0</p> <p>Cells_Texture_InverseDifferenceMoment_DNA_10_0</p> <p>Cells_Texture_InverseDifferenceMoment_DNA_3_0</p> <p>Cells_Texture_InverseDifferenceMoment_DNA_5_0</p> <p>Cells_Texture_InverseDifferenceMoment_Mito_3_0</p> <p>Cells_Texture_InverseDifferenceMoment_Mito_5_0</p> <p>Cells_Texture_InverseDifferenceMoment_RNA_3_0</p> <p>Cells_Texture_InverseDifferenceMoment_RNA_5_0</p> <p>Cells_Texture_SumAverage_DNA_10_0</p> <p>Cells_Texture_SumAverage_DNA_3_0</p> <p>Cells_Texture_SumAverage_DNA_5_0</p> <p>Cells_Texture_SumEntropy_DNA_10_0</p> <p>Cells_Texture_SumEntropy_DNA_3_0</p> <p>Cells_Texture_SumEntropy_DNA_5_0</p> <p>Cells_Texture_SumVariance_Mito_10_0</p> <p>Cells_Texture_Variance_DNA_3_0</p> <p>Cells_Texture_Variance_DNA_5_0</p> |
|  | Cytoplasm | <p>Cytoplasm_AreaShape_Area</p> <p>Cytoplasm_AreaShape_Compactness</p> <p>Cytoplasm_AreaShape_Extent</p> <p>Cytoplasm_AreaShape_FormFactor</p>                                                                                                                                                                                                                                                                                                                                                                                                                                                                                                                                                                                                                                                                                                                                                                                                                                                                                                                                                                                                                                |



|  |  |                                                                                                                                                                                                                                                                                                                                                                                                                                                                                                                                                                                                                                                                                                                                                                                                                                                                                                                                                                                                                                                                                                                                                                                                                                                     |
|--|--|-----------------------------------------------------------------------------------------------------------------------------------------------------------------------------------------------------------------------------------------------------------------------------------------------------------------------------------------------------------------------------------------------------------------------------------------------------------------------------------------------------------------------------------------------------------------------------------------------------------------------------------------------------------------------------------------------------------------------------------------------------------------------------------------------------------------------------------------------------------------------------------------------------------------------------------------------------------------------------------------------------------------------------------------------------------------------------------------------------------------------------------------------------------------------------------------------------------------------------------------------------|
|  |  | <p>Cytoplasm_AreaShape_MaximumRadius</p> <p>Cytoplasm_AreaShape_MeanRadius</p> <p>Cytoplasm_AreaShape_MedianRadius</p> <p>Cytoplasm_AreaShape_MinFeretDiameter</p> <p>Cytoplasm_AreaShape_MinorAxisLength</p> <p>Cytoplasm_AreaShape_Solidity</p> <p>Cytoplasm_AreaShape_Zernike_2_0</p> <p>Cytoplasm_Correlation_Correlation_Mito_RNA</p> <p>Cytoplasm_Correlation_Costes_DNA_Mito</p> <p>Cytoplasm_Correlation_Costes_DNA_RNA</p> <p>Cytoplasm_Correlation_K_ER_RNA</p> <p>Cytoplasm_Correlation_K_RNA_ER</p> <p>Cytoplasm_Correlation_Overlap_DNA_AGP</p> <p>Cytoplasm_Correlation_Overlap_DNA_ER</p> <p>Cytoplasm_Correlation_Overlap_DNA_RNA</p> <p>Cytoplasm_Correlation_RWC_AGP_DNA</p> <p>Cytoplasm_Correlation_RWC_DNA_AGP</p> <p>Cytoplasm_Correlation_RWC_DNA_Mito</p> <p>Cytoplasm_Correlation_RWC_DNA_RNA</p> <p>Cytoplasm_Correlation_RWC_ER_DNA</p> <p>Cytoplasm_Correlation_RWC_ER_Mito</p> <p>Cytoplasm_Correlation_RWC_Mito_DNA</p> <p>Cytoplasm_Correlation_RWC_Mito_ER</p> <p>Cytoplasm_Correlation_RWC_Mito_RNA</p> <p>Cytoplasm_Correlation_RWC_RNA_DNA</p> <p>Cytoplasm_Correlation_RWC_RNA_Mito</p> <p>Cytoplasm_Granularity_15_ER</p> <p>Cytoplasm_Granularity_2_ER</p> <p>Cytoplasm_Intensity_IntegratedIntensity_AGP</p> |
|--|--|-----------------------------------------------------------------------------------------------------------------------------------------------------------------------------------------------------------------------------------------------------------------------------------------------------------------------------------------------------------------------------------------------------------------------------------------------------------------------------------------------------------------------------------------------------------------------------------------------------------------------------------------------------------------------------------------------------------------------------------------------------------------------------------------------------------------------------------------------------------------------------------------------------------------------------------------------------------------------------------------------------------------------------------------------------------------------------------------------------------------------------------------------------------------------------------------------------------------------------------------------------|

|  |  |                                                                                                                                                                                                                                                                                                                                                                                                                                                                                                                                                                                                                                                                                                                                                                                                                                                                                                                                                                                                                                                                                                                                                                                                                                                                                                                                                                             |
|--|--|-----------------------------------------------------------------------------------------------------------------------------------------------------------------------------------------------------------------------------------------------------------------------------------------------------------------------------------------------------------------------------------------------------------------------------------------------------------------------------------------------------------------------------------------------------------------------------------------------------------------------------------------------------------------------------------------------------------------------------------------------------------------------------------------------------------------------------------------------------------------------------------------------------------------------------------------------------------------------------------------------------------------------------------------------------------------------------------------------------------------------------------------------------------------------------------------------------------------------------------------------------------------------------------------------------------------------------------------------------------------------------|
|  |  | <p> Cytoplasm_Intensity_IntegratedIntensity_DNA<br/> Cytoplasm_Intensity_LowerQuartileIntensity_ER<br/> Cytoplasm_Intensity_MassDisplacement_RNA<br/> Cytoplasm_Intensity_MeanIntensityEdge_ER<br/> Cytoplasm_Intensity_MeanIntensity_ER<br/> Cytoplasm_Intensity_MedianIntensity_AGP<br/> Cytoplasm_Intensity_MedianIntensity_ER<br/> Cytoplasm_Intensity_MinIntensityEdge_ER<br/> Cytoplasm_Intensity_MinIntensityEdge_RNA<br/> Cytoplasm_Intensity_MinIntensity_ER<br/> Cytoplasm_Intensity_MinIntensity_RNA<br/> Cytoplasm_RadialDistribution_FracAtD_DNA_3of4<br/> Cytoplasm_Texture_AngularSecondMoment_AGP_3_0<br/> Cytoplasm_Texture_AngularSecondMoment_AGP_5_0<br/> Cytoplasm_Texture_Contrast_AGP_10_0<br/> Cytoplasm_Texture_Contrast_AGP_3_0<br/> Cytoplasm_Texture_Contrast_AGP_5_0<br/> Cytoplasm_Texture_Contrast_DNA_10_0<br/> Cytoplasm_Texture_Contrast_DNA_3_0<br/> Cytoplasm_Texture_Contrast_DNA_5_0<br/> Cytoplasm_Texture_Contrast_ER_10_0<br/> Cytoplasm_Texture_Contrast_RNA_3_0<br/> Cytoplasm_Texture_DifferenceEntropy_AGP_10_0<br/> Cytoplasm_Texture_DifferenceEntropy_AGP_3_0<br/> Cytoplasm_Texture_DifferenceEntropy_AGP_5_0<br/> Cytoplasm_Texture_DifferenceEntropy_ER_10_0<br/> Cytoplasm_Texture_DifferenceEntropy_Mito_10_0<br/> Cytoplasm_Texture_DifferenceEntropy_Mito_3_0<br/> Cytoplasm_Texture_DifferenceEntropy_Mito_5_0 </p> |
|--|--|-----------------------------------------------------------------------------------------------------------------------------------------------------------------------------------------------------------------------------------------------------------------------------------------------------------------------------------------------------------------------------------------------------------------------------------------------------------------------------------------------------------------------------------------------------------------------------------------------------------------------------------------------------------------------------------------------------------------------------------------------------------------------------------------------------------------------------------------------------------------------------------------------------------------------------------------------------------------------------------------------------------------------------------------------------------------------------------------------------------------------------------------------------------------------------------------------------------------------------------------------------------------------------------------------------------------------------------------------------------------------------|

|  |  |                                                                                                                                                                                                                                                                                                                                                                                                                                                                                                                                                                                                                                                                                                                                                                                                                                                                                                                                                                                                                                                                                                                                                                                                                                                                                                                              |
|--|--|------------------------------------------------------------------------------------------------------------------------------------------------------------------------------------------------------------------------------------------------------------------------------------------------------------------------------------------------------------------------------------------------------------------------------------------------------------------------------------------------------------------------------------------------------------------------------------------------------------------------------------------------------------------------------------------------------------------------------------------------------------------------------------------------------------------------------------------------------------------------------------------------------------------------------------------------------------------------------------------------------------------------------------------------------------------------------------------------------------------------------------------------------------------------------------------------------------------------------------------------------------------------------------------------------------------------------|
|  |  | <p> Cytoplasm_Texture_DifferenceEntropy_RNA_3_0<br/> Cytoplasm_Texture_DifferenceEntropy_RNA_5_0<br/> Cytoplasm_Texture_DifferenceVariance_AGP_3_0<br/> Cytoplasm_Texture_DifferenceVariance_DNA_10_0<br/> Cytoplasm_Texture_DifferenceVariance_DNA_3_0<br/> Cytoplasm_Texture_DifferenceVariance_DNA_5_0<br/> Cytoplasm_Texture_DifferenceVariance_Mito_10_0<br/> Cytoplasm_Texture_DifferenceVariance_Mito_5_0<br/> Cytoplasm_Texture_Entropy_AGP_3_0<br/> Cytoplasm_Texture_Entropy_AGP_5_0<br/> Cytoplasm_Texture_Entropy_RNA_3_0<br/> Cytoplasm_Texture_Gabor_AGP_10<br/> Cytoplasm_Texture_Gabor_DNA_10<br/> Cytoplasm_Texture_Gabor_DNA_3<br/> Cytoplasm_Texture_Gabor_DNA_5<br/> Cytoplasm_Texture_Gabor_ER_10<br/> Cytoplasm_Texture_Gabor_Mito_10<br/> Cytoplasm_Texture_InfoMeas1_DNA_3_0<br/> Cytoplasm_Texture_InfoMeas1_Mito_3_0<br/> Cytoplasm_Texture_InfoMeas1_Mito_5_0<br/> Cytoplasm_Texture_InfoMeas1_RNA_10_0<br/> Cytoplasm_Texture_InfoMeas1_RNA_3_0<br/> Cytoplasm_Texture_InfoMeas1_RNA_5_0<br/> Cytoplasm_Texture_InfoMeas2_Mito_3_0<br/> Cytoplasm_Texture_InfoMeas2_Mito_5_0<br/> Cytoplasm_Texture_InfoMeas2_RNA_3_0<br/> Cytoplasm_Texture_InverseDifferenceMoment_AGP_10_0<br/> Cytoplasm_Texture_InverseDifferenceMoment_AGP_3_0<br/> Cytoplasm_Texture_InverseDifferenceMoment_AGP_5_0 </p> |
|--|--|------------------------------------------------------------------------------------------------------------------------------------------------------------------------------------------------------------------------------------------------------------------------------------------------------------------------------------------------------------------------------------------------------------------------------------------------------------------------------------------------------------------------------------------------------------------------------------------------------------------------------------------------------------------------------------------------------------------------------------------------------------------------------------------------------------------------------------------------------------------------------------------------------------------------------------------------------------------------------------------------------------------------------------------------------------------------------------------------------------------------------------------------------------------------------------------------------------------------------------------------------------------------------------------------------------------------------|

|              |           |                                                                                                                                                                                                                                                                                                                                                                                                                                                                    |
|--------------|-----------|--------------------------------------------------------------------------------------------------------------------------------------------------------------------------------------------------------------------------------------------------------------------------------------------------------------------------------------------------------------------------------------------------------------------------------------------------------------------|
|              |           | <p>Cytoplasm_Texture_InverseDifferenceMoment_Mito_3_0</p> <p>Cytoplasm_Texture_InverseDifferenceMoment_Mito_5_0</p> <p>Cytoplasm_Texture_InverseDifferenceMoment_RNA_3_0</p> <p>Cytoplasm_Texture_InverseDifferenceMoment_RNA_5_0</p> <p>Cytoplasm_Texture_SumEntropy_AGP_3_0</p> <p>Cytoplasm_Texture_SumVariance_AGP_3_0</p> <p>Cytoplasm_Texture_SumVariance_DNA_10_0</p> <p>Cytoplasm_Texture_Variance_AGP_10_0</p> <p>Cytoplasm_Texture_Variance_DNA_10_0</p> |
|              | Nuclei    | <p>Nuclei_Correlation_Costes_DNA_Mito</p> <p>Nuclei_Correlation_Costes_DNA_RNA</p> <p>Nuclei_Correlation_K_ER_RNA</p> <p>Nuclei_Granularity_10_DNA</p> <p>Nuclei_Granularity_13_ER</p> <p>Nuclei_Granularity_6_ER</p> <p>Nuclei_Granularity_9_DNA</p> <p>Nuclei_Granularity_9_RNA</p> <p>Nuclei_Texture_SumEntropy_DNA_10_0</p>                                                                                                                                    |
| CP_eTox_H_HT | Cells     | Cells_Texture_Entropy_AGP_5_0                                                                                                                                                                                                                                                                                                                                                                                                                                      |
|              | Cytoplasm | /                                                                                                                                                                                                                                                                                                                                                                                                                                                                  |
|              | Nuclei    | <p>Nuclei_AreaShape_Orientation</p> <p>Nuclei_Texture_Variance_Mito_10_0</p>                                                                                                                                                                                                                                                                                                                                                                                       |
| CP_eTox_H_MF | Cells     | <p>Cells_Correlation_Manders_RNA_ER</p> <p>Cells_Correlation_Overlap_Mito_AGP</p> <p>Cells_Correlation_Overlap_RNA_AGP</p> <p>Cells_Granularity_16_Mito</p> <p>Cells_Intensity_IntegratedIntensityEdge_Mito</p>                                                                                                                                                                                                                                                    |

|               |           |                                                                                                                                                                                                                                                                                                                                                                                                                                                                                                                                                                                                                                                      |
|---------------|-----------|------------------------------------------------------------------------------------------------------------------------------------------------------------------------------------------------------------------------------------------------------------------------------------------------------------------------------------------------------------------------------------------------------------------------------------------------------------------------------------------------------------------------------------------------------------------------------------------------------------------------------------------------------|
|               |           | <p>Cells_Texture_InfoMeas1_Mito_10_0</p> <p>Cells_Texture_InfoMeas1_Mito_5_0</p> <p>Cells_Texture_InfoMeas1_RNA_10_0</p> <p>Cells_Texture_InfoMeas1_RNA_3_0</p> <p>Cells_Texture_InfoMeas1_RNA_5_0</p>                                                                                                                                                                                                                                                                                                                                                                                                                                               |
|               | Cytoplasm | <p>Cytoplasm_Correlation_Overlap_RNA_AGP</p> <p>Cytoplasm_Granularity_16_Mito</p> <p>Cytoplasm_RadialDistribution_FracAtD_DNA_3of4</p> <p>Cytoplasm_Texture_Correlation_DNA_10_0</p> <p>Cytoplasm_Texture_Correlation_DNA_3_0</p> <p>Cytoplasm_Texture_Correlation_DNA_5_0</p> <p>Cytoplasm_Texture_DifferenceVariance_DNA_5_0</p> <p>Cytoplasm_Texture_InfoMeas1_Mito_3_0</p> <p>Cytoplasm_Texture_InfoMeas1_RNA_10_0</p> <p>Cytoplasm_Texture_InfoMeas1_RNA_5_0</p> <p>Cytoplasm_Texture_InfoMeas2_DNA_3_0</p> <p>Cytoplasm_Texture_InfoMeas2_Mito_3_0</p> <p>Cytoplasm_Texture_InfoMeas2_Mito_5_0</p> <p>Cytoplasm_Texture_InfoMeas2_RNA_10_0</p> |
|               | Nuclei    | <p>Nuclei_AreaShape_Zernike_3_1</p> <p>Nuclei_AreaShape_Zernike_8_8</p> <p>Nuclei_AreaShape_Zernike_9_7</p> <p>Nuclei_Correlation_RWC_DNA_ER</p> <p>Nuclei_Correlation_RWC_ER_DNA</p> <p>Nuclei_Granularity_16_Mito</p>                                                                                                                                                                                                                                                                                                                                                                                                                              |
| CP_eTox_H_MHB | Cells     | <p>Cells_Correlation_Costes_AGP_RNA</p> <p>Cells_Correlation_K_ER_AGP</p> <p>Cells_Correlation_K_Mito_RNA</p>                                                                                                                                                                                                                                                                                                                                                                                                                                                                                                                                        |

|  |           |                                                                                                                                                                                                                                                                                                                                                                                                                                                                                                                                                                                                                                                                                                                                                                                                                                                                                                                                                                                                                                                                             |
|--|-----------|-----------------------------------------------------------------------------------------------------------------------------------------------------------------------------------------------------------------------------------------------------------------------------------------------------------------------------------------------------------------------------------------------------------------------------------------------------------------------------------------------------------------------------------------------------------------------------------------------------------------------------------------------------------------------------------------------------------------------------------------------------------------------------------------------------------------------------------------------------------------------------------------------------------------------------------------------------------------------------------------------------------------------------------------------------------------------------|
|  |           | <p>Cells_Correlation_Manders_Mito_ER</p> <p>Cells_Correlation_Manders_RNA_ER</p> <p>Cells_Correlation_RWC_DNA_ER</p> <p>Cells_Correlation_RWC_RNA_ER</p> <p>Cells_Intensity_MeanIntensityEdge_Mito</p> <p>Cells_Intensity_StdIntensityEdge_ER</p> <p>Cells_RadialDistribution_RadialCV_ER_4of4</p> <p>Cells_RadialDistribution_RadialCV_Mito_2of4</p>                                                                                                                                                                                                                                                                                                                                                                                                                                                                                                                                                                                                                                                                                                                       |
|  | Cytoplasm | <p>Cytoplasm_Correlation_Costes_AGP_RNA</p> <p>Cytoplasm_Correlation_K_AGP_ER</p> <p>Cytoplasm_Correlation_K_ER_AGP</p> <p>Cytoplasm_Correlation_Manders_AGP_ER</p> <p>Cytoplasm_Correlation_Manders_DNA_ER</p> <p>Cytoplasm_Correlation_Manders_Mito_ER</p> <p>Cytoplasm_Correlation_Manders_RNA_ER</p> <p>Cytoplasm_Intensity_LowerQuartileIntensity_Mito</p> <p>Cytoplasm_RadialDistribution_FracAtD_AGP_1of4</p> <p>Cytoplasm_RadialDistribution_FracAtD_AGP_2of4</p> <p>Cytoplasm_RadialDistribution_FracAtD_AGP_4of4</p> <p>Cytoplasm_RadialDistribution_FracAtD_ER_1of4</p> <p>Cytoplasm_RadialDistribution_FracAtD_ER_2of4</p> <p>Cytoplasm_RadialDistribution_FracAtD_ER_4of4</p> <p>Cytoplasm_RadialDistribution_FracAtD_Mito_2of4</p> <p>Cytoplasm_RadialDistribution_FracAtD_Mito_3of4</p> <p>Cytoplasm_RadialDistribution_FracAtD_Mito_4of4</p> <p>Cytoplasm_RadialDistribution_MeanFrac_ER_4of4</p> <p>Cytoplasm_RadialDistribution_MeanFrac_Mito_4of4</p> <p>Cytoplasm_RadialDistribution_RadialCV_ER_1of4</p> <p>Cytoplasm_Texture_Correlation_DNA_10_0</p> |

|                |        |                                                                                                                                                                                                                                                                                                                                                                                                                                                                                                          |
|----------------|--------|----------------------------------------------------------------------------------------------------------------------------------------------------------------------------------------------------------------------------------------------------------------------------------------------------------------------------------------------------------------------------------------------------------------------------------------------------------------------------------------------------------|
|                |        | <p>Cytoplasm_Texture_Correlation_DNA_3_0</p> <p>Cytoplasm_Texture_Correlation_DNA_5_0</p> <p>Cytoplasm_Texture_InfoMeas1_DNA_10_0</p> <p>Cytoplasm_Texture_InfoMeas1_DNA_5_0</p> <p>Cytoplasm_Texture_InfoMeas1_Mito_10_0</p> <p>Cytoplasm_Texture_InfoMeas2_DNA_3_0</p> <p>Cytoplasm_Texture_InfoMeas2_DNA_5_0</p> <p>Cytoplasm_Texture_InfoMeas2_Mito_10_0</p>                                                                                                                                         |
|                | Nuclei | <p>Nuclei_AreaShape_Compactness</p> <p>Nuclei_AreaShape_FormFactor</p> <p>Nuclei_AreaShape_Zernike_6_6</p> <p>Nuclei_AreaShape_Zernike_8_8</p> <p>Nuclei_Correlation_RWC_DNA_ER</p> <p>Nuclei_Correlation_RWC_ER_DNA</p> <p>Nuclei_Granularity_10_Mito</p> <p>Nuclei_Granularity_10_RNA</p>                                                                                                                                                                                                              |
| CP_eTox_H_MFHC | Cells  | <p>Cells_Correlation_Manders_Mito_ER</p> <p>Cells_Correlation_Manders_RNA_ER</p> <p>Cells_Correlation_Overlap_Mito_AGP</p> <p>Cells_Correlation_Overlap_RNA_AGP</p> <p>Cells_Granularity_16_Mito</p> <p>Cells_Intensity_IntegratedIntensityEdge_Mito</p> <p>Cells_Texture_InfoMeas1_Mito_10_0</p> <p>Cells_Texture_InfoMeas1_Mito_5_0</p> <p>Cells_Texture_InfoMeas1_RNA_10_0</p> <p>Cells_Texture_InfoMeas1_RNA_3_0</p> <p>Cells_Texture_InfoMeas1_RNA_5_0</p> <p>Cells_Texture_InfoMeas2_Mito_10_0</p> |

|  |           |                                                                                                                                                                                                                                                                                                                                                                                                                                                                                                                                                                                                                                                                                                                                                                                                                                                                                  |
|--|-----------|----------------------------------------------------------------------------------------------------------------------------------------------------------------------------------------------------------------------------------------------------------------------------------------------------------------------------------------------------------------------------------------------------------------------------------------------------------------------------------------------------------------------------------------------------------------------------------------------------------------------------------------------------------------------------------------------------------------------------------------------------------------------------------------------------------------------------------------------------------------------------------|
|  |           | Cells_Texture_InfoMeas2_RNA_10_0                                                                                                                                                                                                                                                                                                                                                                                                                                                                                                                                                                                                                                                                                                                                                                                                                                                 |
|  | Cytoplasm | <p>Cytoplasm_AreaShape_Compactness</p> <p>Cytoplasm_AreaShape_Zernike_1_1</p> <p>Cytoplasm_Correlation_Manders_AGP_ER</p> <p>Cytoplasm_Correlation_Manders_DNA_ER</p> <p>Cytoplasm_Correlation_Manders_RNA_ER</p> <p>Cytoplasm_Correlation_Overlap_RNA_AGP</p> <p>Cytoplasm_Granularity_16_Mito</p> <p>Cytoplasm_Intensity_MassDisplacement_ER</p> <p>Cytoplasm_RadialDistribution_RadialCV_ER_1of4</p> <p>Cytoplasm_RadialDistribution_RadialCV_ER_2of4</p> <p>Cytoplasm_Texture_Correlation_DNA_3_0</p> <p>Cytoplasm_Texture_DifferenceVariance_DNA_5_0</p> <p>Cytoplasm_Texture_InfoMeas1_Mito_3_0</p> <p>Cytoplasm_Texture_InfoMeas1_Mito_5_0</p> <p>Cytoplasm_Texture_InfoMeas1_RNA_10_0</p> <p>Cytoplasm_Texture_InfoMeas1_RNA_5_0</p> <p>Cytoplasm_Texture_InfoMeas2_Mito_3_0</p> <p>Cytoplasm_Texture_InfoMeas2_Mito_5_0</p> <p>Cytoplasm_Texture_InfoMeas2_RNA_10_0</p> |
|  | Nuclei    | <p>Nuclei_AreaShape_Zernike_9_7</p> <p>Nuclei_Correlation_RWC_DNA_ER</p> <p>Nuclei_Granularity_14_RNA</p> <p>Nuclei_Granularity_16_Mito</p> <p>Nuclei_RadialDistribution_FracAtD_ER_3of4</p> <p>Nuclei_RadialDistribution_FracAtD_Mito_3of4</p>                                                                                                                                                                                                                                                                                                                                                                                                                                                                                                                                                                                                                                  |



**Table S5.** Percentages of feature categories in each compartment and dataset before feature selection.

| Compartment | Dataset           | AreaShape | Correlation | Granularity | Intensity | RadialDistribution | Texture | Neighbors | Location | Number | Parent |
|-------------|-------------------|-----------|-------------|-------------|-----------|--------------------|---------|-----------|----------|--------|--------|
| Cells       | CP_DILIs_most_neg | 8.09      | 14.97       | 11.02       | 12.91     | 10.33              | 36.14   | 2.41      | 3.79     | 0.17   | 0.17   |
|             | CP_DILIs_pos_neg  | 8.09      | 14.97       | 11.02       | 12.91     | 10.33              | 36.14   | 2.41      | 3.79     | 0.17   | 0.17   |
|             | CP_eTox_H_HT      | 8.08      | 15.12       | 11.00       | 12.89     | 10.31              | 36.08   | 2.41      | 3.78     | 0.17   | 0.17   |
|             | CP_eTox_H_MF      | 8.08      | 15.12       | 11.00       | 12.89     | 10.31              | 36.08   | 2.41      | 3.78     | 0.17   | 0.17   |
|             | CP_eTox_H_MFHB    | 8.08      | 15.12       | 11.00       | 12.89     | 10.31              | 36.08   | 2.41      | 3.78     | 0.17   | 0.17   |
|             | CP_eTox_H_MFHC    | 8.08      | 15.12       | 11.00       | 12.89     | 10.31              | 36.08   | 2.41      | 3.78     | 0.17   | 0.17   |
| Cytoplasm   | CP_DILIs_most_neg | 8.32      | 14.87       | 11.33       | 13.27     | 10.62              | 37.17   | 0.00      | 3.89     | 0.18   | 0.35   |
|             | CP_DILIs_pos_neg  | 8.32      | 14.87       | 11.33       | 13.27     | 10.62              | 37.17   | 0.00      | 3.89     | 0.18   | 0.35   |
|             | CP_eTox_H_HT      | 8.32      | 14.87       | 11.33       | 13.27     | 10.62              | 37.17   | 0.00      | 3.89     | 0.18   | 0.35   |
|             | CP_eTox_H_MF      | 8.32      | 14.87       | 11.33       | 13.27     | 10.62              | 37.17   | 0.00      | 3.89     | 0.18   | 0.35   |
|             | CP_eTox_H_MFHB    | 8.32      | 14.87       | 11.33       | 13.27     | 10.62              | 37.17   | 0.00      | 3.89     | 0.18   | 0.35   |
|             | CP_eTox_H_MFHC    | 8.32      | 14.87       | 11.33       | 13.27     | 10.62              | 37.17   | 0.00      | 3.89     | 0.18   | 0.35   |
| Nuclei      | CP_DILIs_most_neg | 8.23      | 12.43       | 14.01       | 13.13     | 10.51              | 36.78   | 0.88      | 3.85     | 0.18   | 0.00   |
|             | CP_DILIs_pos_neg  | 8.23      | 12.43       | 14.01       | 13.13     | 10.51              | 36.78   | 0.88      | 3.85     | 0.18   | 0.00   |
|             | CP_eTox_H_HT      | 8.22      | 12.41       | 13.99       | 13.11     | 10.49              | 36.71   | 1.05      | 3.85     | 0.17   | 0.00   |
|             | CP_eTox_H_MF      | 8.22      | 12.41       | 13.99       | 13.11     | 10.49              | 36.71   | 1.05      | 3.85     | 0.17   | 0.00   |
|             | CP_eTox_H_MFHB    | 8.22      | 12.41       | 13.99       | 13.11     | 10.49              | 36.71   | 1.05      | 3.85     | 0.17   | 0.00   |
|             | CP_eTox_H_MFHC    | 8.22      | 12.41       | 13.99       | 13.11     | 10.49              | 36.71   | 1.05      | 3.85     | 0.17   | 0.00   |

**Table S6.** Percentages of feature categories in each compartment and dataset after feature selection.

| Compartment | Dataset           | AreaShape | Correlation | Granularity | Intensity | RadialDistribution | Texture | Neighbors | Location | Number | Parent |
|-------------|-------------------|-----------|-------------|-------------|-----------|--------------------|---------|-----------|----------|--------|--------|
| Cells       | CP_DILIs_most_neg | 3.03      | 18.79       | 6.06        | 9.09      | 11.52              | 49.09   | 2.42      | 0.0      | 0.0    | 0.0    |
|             | CP_DILIs_pos_neg  | 1.82      | 18.18       | 5.45        | 0.00      | 3.64               | 70.91   | 0.00      | 0.0      | 0.0    | 0.0    |
|             | CP_eTox_H_HT      | 18.18     | 18.18       | 18.18       | 9.09      | 0.00               | 36.36   | 0.00      | 0.0      | 0.0    | 0.0    |
|             | CP_eTox_H_MF      | 12.50     | 12.50       | 6.25        | 6.25      | 0.00               | 56.25   | 6.25      | 0.0      | 0.0    | 0.0    |
|             | CP_eTox_H_MFHB    | 5.26      | 31.58       | 31.58       | 31.58     | 0.00               | 0.00    | 0.00      | 0.0      | 0.0    | 0.0    |
|             | CP_eTox_H_MFHC    | 0.00      | 16.67       | 16.67       | 12.50     | 0.00               | 54.17   | 0.00      | 0.0      | 0.0    | 0.0    |
| Cytoplasm   | CP_DILIs_most_neg | 6.35      | 26.19       | 7.94        | 11.90     | 5.56               | 42.06   | 0.00      | 0.0      | 0.0    | 0.0    |
|             | CP_DILIs_pos_neg  | 1.47      | 20.59       | 7.35        | 1.47      | 2.94               | 66.18   | 0.00      | 0.0      | 0.0    | 0.0    |
|             | CP_eTox_H_HT      | 0.00      | 0.00        | 11.11       | 0.00      | 0.00               | 88.89   | 0.00      | 0.0      | 0.0    | 0.0    |
|             | CP_eTox_H_MF      | 0.00      | 12.00       | 8.00        | 0.00      | 0.00               | 80.00   | 0.00      | 0.0      | 0.0    | 0.0    |
|             | CP_eTox_H_MFHB    | 0.00      | 28.57       | 25.00       | 28.57     | 0.00               | 17.86   | 0.00      | 0.0      | 0.0    | 0.0    |
|             | CP_eTox_H_MFHC    | 0.00      | 14.81       | 11.11       | 0.00      | 0.00               | 74.07   | 0.00      | 0.0      | 0.0    | 0.0    |
| Nuclei      | CP_DILIs_most_neg | 2.27      | 25.00       | 38.64       | 6.82      | 22.73              | 0.00    | 4.55      | 0.0      | 0.0    | 0.0    |
|             | CP_DILIs_pos_neg  | 3.85      | 26.92       | 19.23       | 0.00      | 15.38              | 34.62   | 0.00      | 0.0      | 0.0    | 0.0    |
|             | CP_eTox_H_HT      | 30.77     | 0.00        | 15.38       | 30.77     | 7.69               | 15.38   | 0.00      | 0.0      | 0.0    | 0.0    |
|             | CP_eTox_H_MF      | 37.50     | 0.00        | 25.00       | 12.50     | 12.50              | 12.50   | 0.00      | 0.0      | 0.0    | 0.0    |
|             | CP_eTox_H_MFHB    | 25.00     | 2.78        | 19.44       | 30.56     | 13.89              | 8.33    | 0.00      | 0.0      | 0.0    | 0.0    |
|             | CP_eTox_H_MFHC    | 9.09      | 9.09        | 13.64       | 9.09      | 27.27              | 31.82   | 0.00      | 0.0      | 0.0    | 0.0    |

**Table S7.** Ratio of percentage in the selected features relative to the background percentage in the full set of features before selection.

| Compartment | Dataset           | AreaShape | Correlation | Granularity | Intensity | RadialDistribution | Texture  | Neighbors | Location | Number | Parent |
|-------------|-------------------|-----------|-------------|-------------|-----------|--------------------|----------|-----------|----------|--------|--------|
| Cells       | CP_DILIs_most_neg | 0.374536  | 1.255177    | 0.549909    | 0.704105  | 1.115198           | 1.358329 | 1.004149  | 0.0      | 0.0    | 0.0    |
|             | CP_DILIs_pos_neg  | 0.224969  | 1.214429    | 0.494555    | 0.000000  | 0.352372           | 1.962092 | 0.000000  | 0.0      | 0.0    | 0.0    |
|             | CP_eTox_H_HT      | 2.250000  | 1.202381    | 1.652727    | 0.705198  | 0.000000           | 1.007761 | 0.000000  | 0.0      | 0.0    | 0.0    |
|             | CP_eTox_H_MF      | 1.547030  | 0.826720    | 0.568182    | 0.484872  | 0.000000           | 1.559035 | 2.593361  | 0.0      | 0.0    | 0.0    |
|             | CP_eTox_H_MFHB    | 0.650990  | 2.088624    | 2.870909    | 2.449961  | 0.000000           | 0.000000 | 0.000000  | 0.0      | 0.0    | 0.0    |
|             | CP_eTox_H_MFHC    | 0.000000  | 1.102513    | 1.515455    | 0.969744  | 0.000000           | 1.501386 | 0.000000  | 0.0      | 0.0    | 0.0    |
| Cytoplasm   | CP_DILIs_most_neg | 0.763221  | 1.761264    | 0.700794    | 0.896760  | 0.523540           | 1.131558 | NaN       | 0.0      | 0.0    | 0.0    |
|             | CP_DILIs_pos_neg  | 0.176683  | 1.384667    | 0.648720    | 0.110776  | 0.276836           | 1.780468 | NaN       | 0.0      | 0.0    | 0.0    |
|             | CP_eTox_H_HT      | 0.000000  | 0.000000    | 0.980583    | 0.000000  | 0.000000           | 2.391445 | NaN       | 0.0      | 0.0    | 0.0    |
|             | CP_eTox_H_MF      | 0.000000  | 0.806994    | 0.706090    | 0.000000  | 0.000000           | 2.152273 | NaN       | 0.0      | 0.0    | 0.0    |
|             | CP_eTox_H_MFHB    | 0.000000  | 1.921318    | 2.206531    | 2.152977  | 0.000000           | 0.480495 | NaN       | 0.0      | 0.0    | 0.0    |
|             | CP_eTox_H_MFHC    | 0.000000  | 0.995965    | 0.980583    | 0.000000  | 0.000000           | 1.992736 | NaN       | 0.0      | 0.0    | 0.0    |
| Nuclei      | CP_DILIs_most_neg | 0.275820  | 2.011263    | 2.758030    | 0.519421  | 2.162702           | 0.000000 | 5.170455  | 0.0      | 0.0    | NaN    |
|             | CP_DILIs_pos_neg  | 0.467801  | 2.165728    | 1.372591    | 0.000000  | 1.463368           | 0.941272 | 0.000000  | 0.0      | 0.0    | NaN    |
|             | CP_eTox_H_HT      | 3.743309  | 0.000000    | 1.099357    | 2.347063  | 0.733079           | 0.418959 | 0.000000  | 0.0      | 0.0    | NaN    |
|             | CP_eTox_H_MF      | 4.562044  | 0.000000    | 1.786991    | 0.953471  | 1.191611           | 0.340507 | 0.000000  | 0.0      | 0.0    | NaN    |
|             | CP_eTox_H_MFHB    | 3.041363  | 0.224013    | 1.389564    | 2.331045  | 1.324118           | 0.226914 | 0.000000  | 0.0      | 0.0    | NaN    |
|             | CP_eTox_H_MFHC    | 1.105839  | 0.732474    | 0.974982    | 0.693364  | 2.599619           | 0.866794 | 0.000000  | 0.0      | 0.0    | NaN    |

**Table S8.** P-values of the Fisher’s Exact Test between the number of features before and after selection, for each compartment, feature category and dataset.

| Compartment | Dataset           | AreaShape | Correlation | Granularity | Intensity | RadialDistribution | Texture  | Neighbors | Location | Number | Parent |
|-------------|-------------------|-----------|-------------|-------------|-----------|--------------------|----------|-----------|----------|--------|--------|
| Cells       | CP_DILIs_most_neg | 1.0       | 1           | 1.000000    | 1.000000  | 1.000000           | 0.014819 | 1         | 1.0      | 1      | 1      |
|             | CP_DILIs_pos_neg  | 1.0       | 1           | 1.000000    | 1.000000  | 1.000000           | 0.000498 | 1         | 1.0      | 1      | 1      |
|             | CP_eTox_H_HT      | 1.0       | 1           | 1.000000    | 1.000000  | 1.000000           | 0.119281 | 1         | 1.0      | 1      | 1      |
|             | CP_eTox_H_MF      | 1.0       | 1           | 1.000000    | 1.000000  | 1.000000           | 0.018943 | 1         | 1.0      | 1      | 1      |
|             | CP_eTox_H_MFHB    | 1.0       | 1           | 1.000000    | 0.532468  | 1.000000           | 1.000000 | 1         | 1.0      | 1      | 1      |
|             | CP_eTox_H_MFHC    | 1.0       | 1           | 1.000000    | 1.000000  | 1.000000           | 0.024501 | 1         | 1.0      | 1      | 1      |
| Cytoplasm   | CP_DILIs_most_neg | 1.0       | 1           | 1.000000    | 1.000000  | 1.000000           | 0.041540 | 1         | 1.0      | 1      | 1      |
|             | CP_DILIs_pos_neg  | 1.0       | 1           | 1.000000    | 1.000000  | 1.000000           | 0.001026 | 1         | 1.0      | 1      | 1      |
|             | CP_eTox_H_HT      | 1.0       | 1           | 1.000000    | 1.000000  | 1.000000           | 0.001399 | 1         | 1.0      | 1      | 1      |
|             | CP_eTox_H_MF      | 1.0       | 1           | 1.000000    | 1.000000  | 1.000000           | 0.000235 | 1         | 1.0      | 1      | 1      |
|             | CP_eTox_H_MFHB    | 1.0       | 1           | 1.000000    | 0.549722  | 1.000000           | 0.558500 | 1         | 1.0      | 1      | 1      |
|             | CP_eTox_H_MFHC    | 1.0       | 1           | 1.000000    | 1.000000  | 1.000000           | 0.000638 | 1         | 1.0      | 1      | 1      |
| Nuclei      | CP_DILIs_most_neg | 1.0       | 1           | 0.523671    | 1.000000  | 0.568663           | 1.000000 | 1         | 1.0      | 1      | 1      |
|             | CP_DILIs_pos_neg  | 1.0       | 1           | 1.000000    | 1.000000  | 0.566185           | 0.149866 | 1         | 1.0      | 1      | 1      |
|             | CP_eTox_H_HT      | 1.0       | 1           | 1.000000    | 0.528571  | 1.000000           | 1.000000 | 1         | 1.0      | 1      | 1      |
|             | CP_eTox_H_MF      | 1.0       | 1           | 1.000000    | 1.000000  | 1.000000           | 1.000000 | 1         | 1.0      | 1      | 1      |
|             | CP_eTox_H_MFHB    | 1.0       | 1           | 1.000000    | 0.545027  | 1.000000           | 1.000000 | 1         | 1.0      | 1      | 1      |
|             | CP_eTox_H_MFHC    | 1.0       | 1           | 1.000000    | 1.000000  | 0.289353           | 0.288294 | 1         | 1.0      | 1      | 1      |

**Table S9.** Cell Painting features-based clusters details and gene enrichment results. Compounds without gene expression data are displayed in italic.

| CP_DILs_pos_neg |                                                                                                                                                                                   |                               |                             |                              |
|-----------------|-----------------------------------------------------------------------------------------------------------------------------------------------------------------------------------|-------------------------------|-----------------------------|------------------------------|
| Cluster         | Compounds                                                                                                                                                                         | Number of downregulated genes | Number of upregulated genes | Enrichment terms             |
| 6               | Carbamazepine<br><i>Ofloxacin</i><br><i>Isradipine</i><br><i>Aceclofenac</i>                                                                                                      | 21                            | 17                          | /                            |
| 13              | Metoprolol<br>Mexiletine<br>Saquinavir<br>Omeprazole<br><i>Sulfadiazine</i><br><i>Captopril</i><br><i>Valdecoxib</i><br><i>Zonisamide</i><br><i>Iproniazid</i><br><i>Warfarin</i> | 50                            | 60                          | 1 KEGG<br>3 GO BP<br>2 GO CC |
| 16              | Amiloride<br>Pyrimethamine<br>Mefenamic acid<br><i>Prednisone</i>                                                                                                                 | 32                            | 29                          | 0 KEGG<br>4 GO BP<br>5 GO CC |

|    |                                                                                                                                                                        |     |     |                               |
|----|------------------------------------------------------------------------------------------------------------------------------------------------------------------------|-----|-----|-------------------------------|
|    | <i>Prednisolone</i><br><i>Cefazolin</i>                                                                                                                                |     |     |                               |
| 17 | Glyburide<br>Nimesulide<br>Enalapril<br><br><i>Hydralazine</i><br><i>Moxisylyte</i>                                                                                    | 71  | 84  | 0 KEGG<br>5 GO BP<br>0 GO CC  |
| 23 | Verapamil<br>Fluoxetine<br>Citalopram<br>Famnidamol<br>Metoclopramide<br>Amiodarone<br>Prochlorperazine<br>Diclofenac<br><br><i>Cyclobenzaprine</i><br><i>Baclofen</i> | 169 | 191 | 6 KEGG<br>41 GO BP<br>5 GO CC |
| 26 | Mebendazole<br>Amlodipine<br><br><i>Etoposide</i><br><i>Paclitaxel</i>                                                                                                 | 37  | 57  | 5 KEGG<br>3 GO BP<br>0 GO CC  |
| 27 | Ketorolac<br><br><i>Gemifloxacin</i>                                                                                                                                   | 13  | 8   | /                             |

|    |                                                                                                                                                                        |    |    |                               |
|----|------------------------------------------------------------------------------------------------------------------------------------------------------------------------|----|----|-------------------------------|
|    | <i>Sulindac</i><br><i>Chlorothiazide</i><br><i>Norfloracin</i><br><i>Chlorcyclizine</i>                                                                                |    |    |                               |
| 30 | Amitriptyline<br>Clomipramine<br>Tamoxifen<br>Sildenafil<br>Nefazodone<br>Progesterone<br><br><i>Chlorpropamide</i><br><i>Propylthiouracil</i><br><i>Bromocriptine</i> | 59 | 46 | 2 KEGG<br>13 GO BP<br>2 GO CC |
| 31 | Fluconazole<br>Thiotepa<br>Ketoprofen<br>Riluzole<br><br><i>ChlorzoxazoneN</i><br><i>Acetazolamide</i><br><i>Deferoxamine</i>                                          | 60 | 39 | /                             |
| 35 | Propafenone<br>Doxepin<br>Pantoprazole<br>Oxaprozin<br><br><i>Cloxacillin</i>                                                                                          | 62 | 61 | 0 KEGG<br>2 GO BP<br>2 GO CC  |

|    |                                                                                                                                                                    |    |    |                              |
|----|--------------------------------------------------------------------------------------------------------------------------------------------------------------------|----|----|------------------------------|
|    | <i>Clotrimazole</i><br><i>Levothyroxine</i><br><i>Methylprednisolone</i>                                                                                           |    |    |                              |
| 39 | Papaverine<br>Estradiol<br>Flutamide<br><br><i>Azathioprine</i><br><i>Ibuprofen</i>                                                                                | 53 | 52 | 2 KEGG<br>5 GO BP<br>0 GO CC |
| 41 | Quinidine<br>Modafinil<br><br><i>Ciprofloxacin</i><br><i>Fipexide</i><br><i>Trimethoprim</i><br><i>Methazolamide</i><br><i>Lansoprazole</i><br><i>Cefoperazone</i> | 33 | 37 | 0 KEGG<br>2 GO BP<br>0 GO CC |
| 42 | Cetirizine<br>Finasteride<br>Danazol<br><br><i>Acebutolol</i><br><i>Disulfiram</i><br><i>Ethionamide</i>                                                           | 58 | 56 | 1 KEGG<br>2 GO BP<br>0 GO CC |
| 48 | Fenofibrate<br>Carvedilol                                                                                                                                          | 59 | 46 | 0 KEGG<br>2 GO BP            |

|                          |                                                                                                                                                          |                                    |                                      |                               |
|--------------------------|----------------------------------------------------------------------------------------------------------------------------------------------------------|------------------------------------|--------------------------------------|-------------------------------|
|                          | Metaxalone<br>Procainamide<br>Glipizide<br><br><i>Mefloquine</i><br><i>Indomethacin</i><br><i>Terbutaline</i><br><i>Nitrofurantoin</i><br><i>Dapsone</i> |                                    |                                      | 0 GO CC                       |
| 55                       | Mitoxantrone<br>Doxorubicin<br>Lovastatin<br>Simvastatin<br>Nortriptyline<br>Imatinib                                                                    | 609                                | 401                                  | 8 KEGG<br>50 GO BP<br>6 GO CC |
| <b>CP_DILIs_most_neg</b> |                                                                                                                                                          |                                    |                                      |                               |
| <b>Cluster</b>           | <b>Compounds</b>                                                                                                                                         | <b>Number of upregulated genes</b> | <b>Number of downregulated genes</b> | <b>Enrichment terms</b>       |
| 3                        | Nilutamide<br>Atomoxetine<br>Amiodarone<br><br><i>Indomethacin</i><br><i>Disulfiram</i>                                                                  | 64                                 | 60                                   | 2 KEGG<br>13 GO BP<br>1 GO CC |
| 4                        | Etodolac<br>Nialamide                                                                                                                                    | 135                                | 103                                  | 0 KEGG<br>1 GO BP             |

|                     |                                                                                                    |    |    |                              |
|---------------------|----------------------------------------------------------------------------------------------------|----|----|------------------------------|
|                     | Diclofenac<br><br><i>Gemfibrozil</i>                                                               |    |    | 0 GO CC                      |
| 7                   | Nefazodone<br>Clomipramine<br><br><i>Propylthiouracil</i><br><i>Zidovudine</i><br><i>Phenytoin</i> | 22 | 15 | /                            |
| 11                  | Albendazole<br>Riluzole<br><br><i>Acetazolamide</i><br><i>cyclosporin A</i>                        | 19 | 26 | 2 KEGG<br>0 GO BP<br>0 GO CC |
| 12                  | Dantrolene<br>Diltiazem<br>Lamotrigine<br><br><i>Glafenine</i>                                     | 20 | 29 | 0 KEGG<br>8 GO BP<br>0 GO CC |
| 16                  | Carbamazepine<br>Mexiletine<br>Clozapine<br><br><i>Iproniazid</i>                                  | 48 | 43 | /                            |
| <b>CP_eTox_H_HT</b> |                                                                                                    |    |    |                              |
| 2                   | Testosterone propionate                                                                            | 52 | 47 | 2 KEGG                       |



|   |                                                                                                                                                                                                                                                                                                              |     |    |                                              |
|---|--------------------------------------------------------------------------------------------------------------------------------------------------------------------------------------------------------------------------------------------------------------------------------------------------------------|-----|----|----------------------------------------------|
|   | <p>Celecoxib</p> <p>Saquinavir</p> <p>Estrone</p> <p><i>Ethionamide</i></p>                                                                                                                                                                                                                                  |     |    | <p>18 GO BP</p> <p>1 GO CC</p>               |
| 4 | <p>Pinacidil</p> <p>Buspirone</p> <p>Tolazamide</p> <p>Metoprolol</p> <p>Dexamethasone</p> <p>Fexofenadine</p> <p>Ramacemide</p> <p><i>Zolpidem</i></p> <p><i>Ofloxacin</i></p> <p><i>Iproniazid</i></p> <p><i>Carbimazole</i></p> <p><i>Ritodrine</i></p> <p><i>Metyrapone</i></p> <p><i>Valdecoxib</i></p> | 105 | 90 | <p>8 KEGG</p> <p>10 GO BP</p> <p>0 GO CC</p> |
| 9 | <p>Cabergoline</p> <p>Enalapril</p> <p>Nimesulide</p> <p>Probenecid</p> <p>Pseudoephedrine</p> <p>Trazodone</p> <p>Clomethiazole</p> <p>Triamcinolone</p>                                                                                                                                                    | 74  | 87 | <p>1 KEGG</p> <p>0 GO BP</p> <p>3 GO CC</p>  |

|    |                                                                                                                                                                                                                                                                             |    |     |                                              |
|----|-----------------------------------------------------------------------------------------------------------------------------------------------------------------------------------------------------------------------------------------------------------------------------|----|-----|----------------------------------------------|
|    | <p>Practolol</p> <p>Leflunomide</p> <p><i>Tolfenamic acid</i></p> <p><i>Prednisone</i></p> <p><i>Hydralazine</i></p> <p><i>Hydrocortisone acetate</i></p> <p><i>Valacyclovir</i></p> <p><i>Azlocillin</i></p> <p><i>Aceclofenac</i></p> <p><i>Sulfachloropyridazine</i></p> |    |     |                                              |
| 10 | <p><i>Azelastine</i></p> <p><i>Azactam</i></p> <p><i>Zonisamide</i></p> <p>Tolbutamide</p>                                                                                                                                                                                  | 27 | 23  | /                                            |
| 35 | <p>Glyburide</p> <p>Thalidomide</p> <p>Caffeine</p> <p><i>Cefuroxime</i></p>                                                                                                                                                                                                | 88 | 114 | <p>2 KEGG</p> <p>16 GO BP</p> <p>3 GO CC</p> |
| 37 | <p>Haloperidol</p> <p>Pirfenidone</p> <p>Venlafaxine</p> <p>Doxylamine</p> <p>Benzthiazide</p> <p>Ticlopidine</p> <p><i>Atenolol</i></p>                                                                                                                                    | 89 | 80  | <p>3 KEGG</p> <p>5 GO BP</p> <p>3 GO CC</p>  |

|    |                                                                                                                                                         |     |     |                               |
|----|---------------------------------------------------------------------------------------------------------------------------------------------------------|-----|-----|-------------------------------|
|    | <i>Cinchophen</i><br><i>Nabumetone</i><br><i>Methoxsalen</i>                                                                                            |     |     |                               |
| 38 | Proguanil<br>Levonorgestrel<br><br><i>Diazepam</i><br><i>Chlormezanone</i>                                                                              | 11  | 16  | 0 KEGG<br>0 GO BP<br>5 GO CC  |
| 39 | Cyproheptadine<br><br><i>Cefoperazone</i><br><i>Estrone sulfate</i><br><i>4-Phenylbutyric acid</i><br><br><i>Sulfathiazole</i><br><i>Norfloxacin</i>    | 9   | 13  | /                             |
| 40 | Pheniramine<br>Diphenidol<br>Tinidazole<br><br><i>Cephalothin</i><br><i>Periciazine</i><br><i>Niridazole</i><br><i>Mephénytoin</i><br><i>Levamisole</i> | 33  | 38  | /                             |
| 43 | Amiodarone<br>Salmeterol<br>Amoxapine                                                                                                                   | 125 | 133 | 4 KEGG<br>26 GO BP<br>5 GO CC |

|    |                                                                                                                                                                                                                                                                                                                                 |     |     |                                              |
|----|---------------------------------------------------------------------------------------------------------------------------------------------------------------------------------------------------------------------------------------------------------------------------------------------------------------------------------|-----|-----|----------------------------------------------|
|    | <p>Mometasone furoate</p> <p>Amiloride</p> <p>Naftidrofuryl</p> <p>Praziquantel</p> <p>Prochlorperazine</p><br><p><i>Cyclobenzaprine</i></p> <p><i>Indomethacin</i></p> <p><i>Thiamphenicol</i></p> <p><i>Piribedil</i></p> <p><i>Letrozole</i></p>                                                                             |     |     |                                              |
| 44 | <p>Propafenone</p> <p>Niridazole</p> <p>Amitriptyline</p> <p>Simvastatin</p> <p>Chlorpromazine</p> <p>Tamoxifen</p> <p>Bepidil</p> <p>Mibefradil</p> <p>Nortriptyline</p> <p>Loxapine</p> <p>Fenofibrate</p> <p>Pizotifen</p> <p>Pindolol</p><br><p><i>Clotrimazole</i></p> <p><i>Astemizole</i></p> <p><i>Fluvastatine</i></p> | 202 | 235 | <p>2 KEGG</p> <p>15 GO BP</p> <p>8 GO CC</p> |

|    |                                                                                                                                                                                                                                                                                                                                                                           |     |     |                                               |
|----|---------------------------------------------------------------------------------------------------------------------------------------------------------------------------------------------------------------------------------------------------------------------------------------------------------------------------------------------------------------------------|-----|-----|-----------------------------------------------|
| 45 | <p>Thiotepa</p> <p>Riluzole</p> <p>Quinapril</p> <p>Verapamil</p> <p>Progesterone</p><br><p><i>Terbutaline</i></p> <p><i>Chlorpropamide</i></p> <p><i>Etoposide</i></p> <p><i>Hycanthone</i></p> <p><i>Acetazolamide</i></p>                                                                                                                                              | 79  | 65  | <p>1 KEGG</p> <p>4 GO BP</p> <p>0 GO CC</p>   |
| 46 | <p>Mesoridazine</p> <p>Pimozide</p> <p>Fluspirilene</p> <p>Flufenamic acid</p> <p>Mebendazole</p> <p>Albendazole</p> <p>Niclosamide</p> <p>Prazosin</p> <p>Paroxetine</p> <p>Nilutamide</p> <p>Flecainide</p> <p>Ornidazole</p><br><p><i>Hydroflumethiazide</i></p> <p><i>Bambuterol</i></p> <p><i>Colchicine</i></p> <p><i>AHZ9RYL9EW</i></p> <p><i>Azathioprine</i></p> | 204 | 203 | <p>11 KEGG</p> <p>45 GO BP</p> <p>9 GO CC</p> |

|    |                                                                                                                                                                                                            |    |    |                                             |
|----|------------------------------------------------------------------------------------------------------------------------------------------------------------------------------------------------------------|----|----|---------------------------------------------|
| 57 | <p>Sertaconazole</p> <p>Phentolamine</p> <p><i>Althiazide</i></p> <p><i>Acetohexamide</i></p> <p><i>Chlorzoxazone</i></p> <p><i>Propranolol</i></p>                                                        | 20 | 17 | <p>0 KEGG</p> <p>2 GO BP</p> <p>0 GO CC</p> |
| 58 | <p>Ketoprofen</p> <p>Spirolactone</p> <p>Milrinone</p> <p>Perphenazine</p> <p>Metaxalone</p> <p><i>Tolazoline</i></p> <p><i>Methylergonovine</i></p> <p><i>Chlorothiazide</i></p> <p><i>Disulfiram</i></p> | 54 | 66 | <p>0 KEGG</p> <p>6 GO BP</p> <p>0 GO CC</p> |
| 59 | <p>Cilostazol</p> <p>Fluconazole</p> <p>Clomipramine</p> <p><i>Enoxacin</i></p> <p><i>Miconazole</i></p>                                                                                                   | 67 | 55 | <p>0 KEGG</p> <p>4 GO BP</p> <p>0 GO CC</p> |
| 61 | <p>8-methyl-8-azabicyclo[3.2.1]oct-3-yl</p> <p>1H-indole-3-carboxylate</p> <p>Trimethobenzamide</p> <p>Metoclopramide</p> <p>Papaverine</p>                                                                | 66 | 62 | <p>1 KEGG</p> <p>1 GO BP</p> <p>2 GO CC</p> |

|    |                                                                                                                                                                                                                                                |     |     |                                              |
|----|------------------------------------------------------------------------------------------------------------------------------------------------------------------------------------------------------------------------------------------------|-----|-----|----------------------------------------------|
|    | <p>Bromhexine</p> <p>Nefazodone</p> <p><i>Bromocriptine</i></p> <p><i>Propylthiouracil</i></p> <p><i>Torse mide</i></p> <p><i>Sulfamethoxazole</i></p> <p><i>Oxybutynin</i></p>                                                                |     |     |                                              |
| 68 | <p>Flunarizine</p> <p>Betahistine</p> <p>Norethindrone</p> <p>Alfuzosin</p> <p>Terfenadine</p> <p>Alrestatin</p> <p><i>Deferoxamine</i></p> <p><i>Moxisylyte</i></p> <p><i>Moricizine</i></p> <p><i>Glafenine</i></p> <p><i>Imipramine</i></p> | 108 | 97  | <p>2 KEGG</p> <p>27 GO BP</p> <p>4 GO CC</p> |
| 69 | <p>Talniflumate</p> <p>Rimexolone</p> <p>Fluticasone propionate</p> <p>Pyrimethamine</p> <p>Beclomethasone dipropionate</p> <p>Nialamide</p> <p>Flutamide</p> <p>Bezafibrate</p>                                                               | 151 | 161 | <p>1 KEGG</p> <p>4 GO BP</p> <p>0 GO CC</p>  |

|     |                                                                                                                                                                                                                                                                                                         |    |    |                                             |
|-----|---------------------------------------------------------------------------------------------------------------------------------------------------------------------------------------------------------------------------------------------------------------------------------------------------------|----|----|---------------------------------------------|
|     | <p>Ketotifen</p> <p>Pantoprazole</p> <p><i>Ethacrynic acid</i></p> <p><i>Meticrane</i></p> <p><i>Piperacillin</i></p> <p><i>Tianeptine</i></p> <p><i>Phenytoin</i></p> <p><i>Bergapten</i></p>                                                                                                          |    |    |                                             |
| 97  | <p>Falnidamol</p> <p>Fluoxetine</p> <p><i>Sulfadimethoxine</i></p> <p><i>Sulfaethidole</i></p>                                                                                                                                                                                                          | 71 | 44 | <p>2 KEGG</p> <p>8 GO BP</p> <p>1 GO CC</p> |
| 102 | <p>Iopanoic acid</p> <p>Cefotiam</p> <p>Mepivacaine</p> <p>Ketorolac</p> <p>Chlorthalidone</p> <p>Mirtazapine</p> <p>Sildenafil</p> <p><i>Metaproterenol</i></p> <p><i>Indapamide</i></p> <p><i>Trichlormethiazide</i></p> <p><i>Suprofen</i></p> <p><i>Pentobarbital</i></p> <p><i>Repaglinide</i></p> | 81 | 82 | <p>1 KEGG</p> <p>4 GO BP</p> <p>0 GO CC</p> |



|     |                                                                                                             |     |     |                                |
|-----|-------------------------------------------------------------------------------------------------------------|-----|-----|--------------------------------|
|     | <i>Prednisolone</i><br><i>Clidinium</i><br><i>Cyclizine</i>                                                 |     |     |                                |
| 103 | Carteolol<br>Fenoterol<br>Ciprofibrate<br><br><i>Tegaserod</i><br><i>Lomefloxacin</i><br><i>Phenacemide</i> | 41  | 45  | /                              |
| 107 | Pentoxifylline<br>Isocarboxazid<br>Ondansetron<br>Triflupromazine<br>Amantadine                             | 92  | 78  | /                              |
| 118 | Fenbufen<br>Valsartan<br>Methocarbamol<br>Raloxifene<br><br><i>Lansoprazole</i>                             | 43  | 43  | 0 KEGG<br>3 GO BP<br>0 GO CC   |
| 119 | Loperamide<br>Estradiol<br>Diltiazem<br>Primaquine<br>Ciglitazone<br>Doxepin                                | 103 | 105 | 13 KEGG<br>18 GO BP<br>3 GO CC |

|     |                                                                                                                                                                                                                                                                                                                                                                                 |     |     |                                             |
|-----|---------------------------------------------------------------------------------------------------------------------------------------------------------------------------------------------------------------------------------------------------------------------------------------------------------------------------------------------------------------------------------|-----|-----|---------------------------------------------|
|     | <p>Sulfisoxazole</p> <p>Famciclovir</p> <p><i>Famotidine</i></p> <p><i>Methazolamide</i></p> <p><i>Furosemide</i></p> <p><i>Gliclazide</i></p> <p><i>Trimethoprim</i></p> <p><i>Sulfacetamide</i></p> <p><i>Phthalylsulfathiazole</i></p> <p><i>Hydroxyzine</i></p> <p><i>Atrazine</i></p> <p><i>Diphenylpyraline</i></p> <p><i>Metamizole</i></p> <p><i>Sulfamethizole</i></p> |     |     |                                             |
| 123 | <p>Diflunisal</p> <p>Omeprazole</p> <p>Perindopril</p> <p><i>Iocetamic acid</i></p> <p><i>Metronidazole</i></p>                                                                                                                                                                                                                                                                 | 248 | 408 | <p>7 KEGG</p> <p>7 GO BP</p> <p>2 GO CC</p> |
| 131 | <p>Propofol</p> <p>Primidone</p> <p><i>Nomifensine</i></p> <p><i>Pefloxacin</i></p> <p><i>Molindone</i></p>                                                                                                                                                                                                                                                                     | 22  | 20  | /                                           |
| 133 | <p>Risperidone</p> <p>Tranilast</p>                                                                                                                                                                                                                                                                                                                                             | 16  | 35  | <p>2 KEGG</p> <p>3 GO BP</p>                |

|     |                                                                                                                                                                                                                      |     |     |                                                |
|-----|----------------------------------------------------------------------------------------------------------------------------------------------------------------------------------------------------------------------|-----|-----|------------------------------------------------|
|     | <p><i>Baclofen</i></p> <p><i>Xylometazoline</i></p> <p><i>Liothyronine</i></p> <p><i>Benazepril</i></p> <p><i>Chlorotrianisene</i></p>                                                                               |     |     | 1 GO CC                                        |
| 135 | <p>Trimipramine</p> <p>Tolmetin</p> <p>Statil</p> <p>Guanfacine</p> <p>Clozapine</p> <p>Domperidone</p> <p>Cimetidine</p> <p>Triamterene</p> <p>Disopyramide</p> <p><i>Selegiline</i></p> <p><i>Flurbiprofen</i></p> | 143 | 129 | <p>4 KEGG</p> <p>5 GO BP</p> <p>10 GO CC</p>   |
| 136 | <p>Candesartan cilexetil</p> <p>Digoxin</p> <p>Penicillin g</p> <p>Naproxen</p> <p>Benzbromarone</p> <p>Omacetaxine mepesuccinate</p> <p><i>Quinethazone</i></p> <p><i>Pilocarpine</i></p>                           | 308 | 592 | <p>20 KEGG</p> <p>48 GO BP</p> <p>15 GO CC</p> |
| 137 | Atomoxetine                                                                                                                                                                                                          | 165 | 112 | 5 KEGG                                         |

|                     | <p>Oxaprozin</p> <p>Dicloxacillin</p> <p>Meclofenamic acid</p> <p>Dantrolene</p> <p>Bumetanide</p> <p>Lidocaine</p> <p>Bupropion</p> <p>Olmesartan medoxomil</p> <p>Mefenamic acid</p> <p>Lovastatin</p> <p><i>Adenosine</i></p> <p><i>Methapyrilene</i></p> <p><i>Zopiclone</i></p> <p><i>Sulfamethoxyypyridazine</i></p> |                                    |                                      | <p>11 GO BP</p> <p>4 GO CC</p>              |
|---------------------|----------------------------------------------------------------------------------------------------------------------------------------------------------------------------------------------------------------------------------------------------------------------------------------------------------------------------|------------------------------------|--------------------------------------|---------------------------------------------|
| <b>CP_eTox_H_MF</b> |                                                                                                                                                                                                                                                                                                                            |                                    |                                      |                                             |
| <b>Cluster</b>      | <b>Compounds</b>                                                                                                                                                                                                                                                                                                           | <b>Number of upregulated genes</b> | <b>Number of downregulated genes</b> | <b>Enrichment terms</b>                     |
| 2                   | <p>Ornidazole</p> <p>Meclofenamic acid</p> <p><i>Letrozole</i></p> <p><i>Methapyrilene</i></p>                                                                                                                                                                                                                             | 22                                 | 18                                   | /                                           |
| 6                   | <p>Amiloride</p> <p>Beclomethasone dipropionate</p> <p>Trazodone</p>                                                                                                                                                                                                                                                       | 78                                 | 89                                   | <p>2 KEGG</p> <p>8 GO BP</p> <p>6 GO CC</p> |

|    |                                                                                                                                                                                                                 |     |     |                                               |
|----|-----------------------------------------------------------------------------------------------------------------------------------------------------------------------------------------------------------------|-----|-----|-----------------------------------------------|
|    | <p>Triamcinolone</p> <p>Amantadine</p> <p>Dexamethasone acetate</p> <p><i>Meticrane</i></p> <p><i>Hydrocortisone acetate</i></p> <p><i>Prednisolone</i></p> <p><i>Prednisone</i></p> <p><i>Piperacillin</i></p> |     |     |                                               |
| 7  | <p>Propofol</p> <p>Digoxin</p> <p>Daunorubicin</p> <p><i>Molindone</i></p> <p><i>Valacyclovir</i></p>                                                                                                           | 402 | 405 | <p>6 KEGG</p> <p>47 GO BP</p> <p>13 GO CC</p> |
| 8  | <p>Omeprazole</p> <p><i>Adenosine</i></p> <p><i>Hydrochlorothiazide</i></p> <p><i>Azactam</i></p>                                                                                                               | 24  | 28  | /                                             |
| 10 | <p>Carteolol</p> <p>Buspirone</p> <p>Clozapine</p> <p>Carbamazepine</p> <p>Estrone</p> <p><i>Ofloxacin</i></p> <p><i>Metyrapone</i></p>                                                                         | 68  | 58  | <p>0 KEGG</p> <p>1 GO BP</p> <p>0 GO CC</p>   |

|    |                                                                                                                                                                                                                                                                                                                  |     |     |                                               |
|----|------------------------------------------------------------------------------------------------------------------------------------------------------------------------------------------------------------------------------------------------------------------------------------------------------------------|-----|-----|-----------------------------------------------|
| 13 | <p>Fexofenadine</p> <p>Fenoterol</p> <p>Saquinavir</p> <p>Phenylbutazone</p> <p>Mexiletine</p> <p>Candesartan cilexetil</p> <p>Metoprolol</p> <p><i>Sulfadiazine</i></p> <p><i>Lomefloxacin</i></p> <p><i>Tegaserod</i></p> <p><i>Zonisamide</i></p> <p><i>Trichlormethiazide</i></p>                            | 80  | 70  | <p>0 KEGG</p> <p>1 GO BP</p> <p>0 GO CC</p>   |
| 18 | <p>Celecoxib</p> <p>Lidocaine</p> <p>Thalidomide</p> <p>Clomethiazole</p> <p>Moxonidine</p> <p>Metolazone</p> <p>Disopyramide</p> <p>Mesoridazine</p> <p>Domperidone</p> <p><i>Chlorotrianisene</i></p> <p><i>Nitrofurantoin</i></p> <p><i>Zomepirac</i></p> <p><i>Phenacemide</i></p> <p><i>Galantamine</i></p> | 138 | 153 | <p>9 KEGG</p> <p>55 GO BP</p> <p>14 GO CC</p> |

|    |                                                                                                                                                                                                            |    |    |                              |
|----|------------------------------------------------------------------------------------------------------------------------------------------------------------------------------------------------------------|----|----|------------------------------|
| 19 | Prochlorperazine<br>Pravastatin<br>Perindopril<br><i>Hydroflumethiazide</i><br><i>Indapamide</i>                                                                                                           | 30 | 34 | 0 KEGG<br>1 GO BP<br>0 GO CC |
| 20 | Penicillin g<br>Diazoxide<br>Pseudoephedrine<br>Alfuzosin<br><i>Carbimazole</i><br><i>Metronidazole</i><br><i>4-Phenylbutyric acid</i><br><i>Selegiline</i><br><i>Flurbiprofen</i><br><i>Pentobarbital</i> | 60 | 54 | 2 KEGG<br>0 GO BP<br>3 GO CC |
| 21 | Testosterone propionate<br>Methysergide<br><i>Aceclofenac</i><br><i>Diphenhydramine</i><br><i>Benazepril</i>                                                                                               | 27 | 20 | 3 KEGG<br>0 GO BP<br>0 GO BP |
| 22 | Methocarbamol<br>Probenecid<br>Enalapril<br>Gatifloxacin<br>Ondansetron                                                                                                                                    | 58 | 43 | /                            |

|    |                                                                                                                                                                                                                            |    |    |                                             |
|----|----------------------------------------------------------------------------------------------------------------------------------------------------------------------------------------------------------------------------|----|----|---------------------------------------------|
|    | <p><i>Liothyronine</i></p> <p><i>Azelastine</i></p> <p><i>Tolfenamic acid</i></p> <p><i>Tocainide</i></p> <p><i>Acebutolol</i></p> <p><i>Pilocarpine</i></p> <p><i>Sulfamethoxypyridazine</i></p> <p><i>Cinchophen</i></p> |    |    |                                             |
| 24 | <p>Atenolol</p> <p><i>Chlormezanone</i></p> <p><i>Proguanil</i></p> <p><i>Mephénytoin</i></p>                                                                                                                              | 5  | 2  | /                                           |
| 25 | <p>Metaxalone</p> <p>Cyproheptadine</p> <p><i>Methoxsalen</i></p> <p><i>Sulfathiazole</i></p>                                                                                                                              | 20 | 22 | /                                           |
| 28 | <p>Cimetidine</p> <p>Pentoxifylline</p> <p><i>Sulfaethidole</i></p> <p><i>Hydralazine</i></p> <p><i>Levamisole</i></p> <p><i>Niridazole</i></p> <p><i>Sulfamerazine</i></p>                                                | 46 | 40 | <p>2 KEGG</p> <p>4 GO BP</p> <p>1 GO CC</p> |



|    |                                                                                                                                                                                                                                                         |     |     |                                               |
|----|---------------------------------------------------------------------------------------------------------------------------------------------------------------------------------------------------------------------------------------------------------|-----|-----|-----------------------------------------------|
| 29 | <p>Salmeterol</p> <p>Raloxifene</p> <p>Benzbromarone</p> <p>Olmesartan medoxomil</p> <p>Mefenamic acid</p> <p>Pimozide</p> <p>Imatinib</p> <p>Carvedilol</p> <p>Diclofenac</p> <p>Dibenzepin</p> <p><i>Cyclobenzaprine</i></p> <p><i>Loratadine</i></p> | 149 | 142 | <p>16 KEGG</p> <p>38 GO BP</p> <p>2 GO CC</p> |
| 30 | <p>Bendroflumethiazide</p> <p>Flecainide</p> <p>Dydrogesterone</p> <p>Procainamide</p> <p><i>Zolpidem</i></p> <p><i>Dichlorophen</i></p>                                                                                                                | 57  | 66  | <p>0 KEGG</p> <p>2 GO BP</p> <p>1 GO CC</p>   |
| 32 | <p>Caffeine</p> <p>Risperidone</p> <p>Ketotifen</p> <p>Cilostazol</p> <p><i>Ketoconazole</i></p> <p><i>Xylometazoline</i></p>                                                                                                                           | 89  | 104 | <p>7 KEGG</p> <p>10 GO BP</p> <p>2 GO CC</p>  |
| 34 | Mometasone furoate                                                                                                                                                                                                                                      | 54  | 54  | 0 KEGG                                        |

|    |                                                                                                                                                                                             |    |    |                                             |
|----|---------------------------------------------------------------------------------------------------------------------------------------------------------------------------------------------|----|----|---------------------------------------------|
|    | <p>Fluticasone propionate</p> <p>Rimexolone</p> <p>Pyrimethamine</p> <p>Praziquantel</p> <p>Triamterene</p> <p><i>Nafcillin</i></p>                                                         |    |    | <p>6 GO BP</p> <p>0 GO CC</p>               |
| 35 | <p>Trifluoperazine</p> <p>Nortriptyline</p> <p>Simvastatin</p> <p><i>Imipramine</i></p>                                                                                                     | 70 | 55 | <p>5 KEGG</p> <p>4 GO BP</p> <p>1 GO CC</p> |
| 38 | <p>Modafinil</p> <p>Danthron</p> <p>Sulfisoxazole</p> <p><i>Lansoprazole</i></p> <p><i>Methazolamide</i></p> <p><i>Trimethoprim</i></p> <p><i>Gliclazide</i></p> <p><i>Cefoperazone</i></p> | 28 | 33 | <p>0 KEGG</p> <p>1 GO BP</p> <p>0 GO CC</p> |
| 40 | <p>Primaquine</p> <p>Famciclovir</p> <p>Bisacodyl</p> <p>Diltiazem</p> <p><i>Furosemide</i></p> <p><i>Famotidine</i></p>                                                                    | 59 | 52 | <p>2 KEGG</p> <p>1 GO BP</p> <p>6 GO CC</p> |

|    |                                                                                                                                                                          |    |    |                              |
|----|--------------------------------------------------------------------------------------------------------------------------------------------------------------------------|----|----|------------------------------|
|    | <i>Hydroxyzine</i><br><i>Sulfacetamide</i><br><i>Phthalylsulfathiazole</i><br><i>Diphenylpyraline</i>                                                                    |    |    |                              |
| 43 | Trimipramine<br>Levonorgestrel<br>Estradiol<br>Fenofibrate<br>Lamotrigine<br>Norethindrone<br><br><i>Clotrimazole</i>                                                    | 74 | 73 | 3 KEGG<br>2 GO BP<br>0 GO CC |
| 47 | Pheniramine<br>Propafenone<br>Amoxapine<br>Oxaprozin<br>Doxepin<br><br><i>Melatonin</i><br><i>Doxazosin</i><br><i>Diazepam</i><br><i>Glafenine</i><br><i>Cloxacillin</i> | 75 | 82 | 0 KEGG<br>1 GO BP<br>0 GO CC |
| 58 | Mebendazole<br>Albendazole<br>Etodolac<br><br><i>Colchicine</i>                                                                                                          | 66 | 68 | 4 KEGG<br>0 GO BP<br>0 GO CC |

|    |                                                                                                                                                                    |     |     |                                |
|----|--------------------------------------------------------------------------------------------------------------------------------------------------------------------|-----|-----|--------------------------------|
|    | <i>AHZ9RYL9EW</i>                                                                                                                                                  |     |     |                                |
| 59 | Bumetanide<br>Naproxen<br>Mibefradil<br>Bepridil<br>Amiodarone<br>Loraxpine<br>Perphenazine<br>Atomoxetine<br>Finasteride<br>Lovastatin<br><br><i>Fluvastatine</i> | 191 | 206 | 10 KEGG<br>24 GO BP<br>4 GO CC |
| 60 | Diphenidol<br>Nimesulide<br><br><i>Phenytoin</i><br><i>Moxisylyte</i>                                                                                              | 25  | 18  | /                              |
| 61 | Clemastine<br>Paroxetine<br>Naftidrofuryl<br><br><i>Clidinium</i><br><i>Bromocriptine</i>                                                                          | 57  | 59  | /                              |
| 63 | Ketoprofen<br>Promazine<br>Mirtazapine                                                                                                                             | 123 | 118 | 2 KEGG<br>6 GO BP<br>0 GO CC   |

|    |                                                                                                                                                                                         |    |    |                                             |
|----|-----------------------------------------------------------------------------------------------------------------------------------------------------------------------------------------|----|----|---------------------------------------------|
|    | <p>Fluoxetine</p> <p>Niridazole</p> <p>Pizotifen</p><br><p><i>Repaglinide</i></p> <p><i>Propranolol</i></p>                                                                             |    |    |                                             |
| 64 | <p>Triflupromazine</p> <p>Haloperidol</p> <p>Flunarizine</p> <p>Quinapril</p>                                                                                                           | 82 | 68 | /                                           |
| 65 | <p>Thiotepa</p> <p>Amitriptyline</p> <p>Trimethobenzamide</p> <p>Tamoxifen</p><br><p><i>Disulfiram</i></p> <p><i>Etoposide</i></p> <p><i>Acetazolamide</i></p> <p><i>Astemizole</i></p> | 63 | 44 | <p>2 KEGG</p> <p>6 GO BP</p> <p>0 GO CC</p> |
| 66 | <p>Verapamil</p> <p>Phentolamine</p> <p>Progesterone</p> <p>Protriptyline</p><br><p><i>Chlorpropamide</i></p> <p><i>Nabumetone</i></p> <p><i>Chlorzoxazone</i></p>                      | 91 | 86 | <p>0 KEGG</p> <p>2 GO BP</p> <p>1 GO CC</p> |

|                       |                                                                                                       |                                    |                                      |                                |
|-----------------------|-------------------------------------------------------------------------------------------------------|------------------------------------|--------------------------------------|--------------------------------|
| 68                    | Clomipramine<br>Nefazodone<br><br><i>Tolazoline</i><br><i>Chlorothiazide</i>                          | 22                                 | 15                                   | /                              |
| 70                    | Fluconazole<br>Mepivacaine<br>Riluzole<br><br><i>Terbutaline</i><br><i>Propylthiouracil</i>           | 28                                 | 31                                   | 0 KEGG<br>1 GO BP<br>0 GO CC   |
| 74                    | Ketorolac<br><br><i>Enoxacin</i><br><i>Cyclizine</i><br><i>Acetohexamide</i>                          | 13                                 | 8                                    | /                              |
| <b>CP_eTox_H_MFHB</b> |                                                                                                       |                                    |                                      |                                |
| <b>Cluster</b>        | <b>Compounds</b>                                                                                      | <b>Number of upregulated genes</b> | <b>Number of downregulated genes</b> | <b>Enrichment terms</b>        |
| 2                     | Digoxin<br>Daunorubicin<br>Mebendazole<br>Imatinib<br><br><i>Acetaminophen</i><br><i>Clotrimazole</i> | 410                                | 421                                  | 5 KEGG<br>43 GO BP<br>11 GO CC |

|    |                                                                                                                                              |     |     |                                              |
|----|----------------------------------------------------------------------------------------------------------------------------------------------|-----|-----|----------------------------------------------|
| 3  | <p>Flunarizine</p> <p>Clomipramine</p> <p>Fluconazole</p> <p>Levonorgestrel</p> <p><i>Chlorpropamide</i></p>                                 | 53  | 38  | <p>1 KEGG</p> <p>2 GO BP</p> <p>0 GO CC</p>  |
| 6  | <p>Disopyramide</p> <p>Raloxifene</p> <p><i>Propranolol</i></p> <p><i>Lansoprazole</i></p> <p><i>Nabumetone</i></p> <p><i>Zonisamide</i></p> | 51  | 53  | <p>2 KEGG</p> <p>5 GO BP</p> <p>11 GO BP</p> |
| 7  | <p>Flecainide</p> <p>Quinapril</p> <p>Propofol</p> <p><i>Imipramine</i></p>                                                                  | 42  | 45  | /                                            |
| 8  | <p>Diclofenac</p> <p>Fenofibrate</p> <p>Pantoprazole</p> <p><i>Sotalol</i></p> <p><i>Methapyrilene</i></p>                                   | 31  | 31  | <p>1 KEGG</p> <p>0 GO BP</p> <p>0 GO CC</p>  |
| 11 | <p>Amoxapine</p> <p>Trifluoperazine</p> <p>Nilutamide</p>                                                                                    | 135 | 124 | <p>4 KEGG</p> <p>26 GO BP</p> <p>1 GO CC</p> |

|    |                                                                                                                                                                                                                                              |    |     |                                             |
|----|----------------------------------------------------------------------------------------------------------------------------------------------------------------------------------------------------------------------------------------------|----|-----|---------------------------------------------|
|    | <p>Pizotifen</p> <p>Nortriptyline</p> <p>Tamoxifen</p> <p>Loperamide</p> <p>Ketoprofen</p> <p>Fluoxetine</p>                                                                                                                                 |    |     |                                             |
| 12 | <p>Doxepin</p> <p>Propafenone</p> <p>Haloperidol</p> <p>Triflupromazine</p> <p>Cilostazol</p><br><p><i>Cyclobenzaprine</i></p> <p><i>Cloxacillin</i></p>                                                                                     | 96 | 106 | <p>0 KEGG</p> <p>1 GO BP</p> <p>0 GO CC</p> |
| 13 | <p>Risperidone</p> <p>Valsartan</p> <p>Moxonidine</p> <p>Finasteride</p><br><p><i>Propylthiouracil</i></p> <p><i>Diphenylpyraline</i></p> <p><i>Valacyclovir</i></p> <p><i>Diazepam</i></p> <p><i>Disulfiram</i></p> <p><i>Clidinium</i></p> | 39 | 57  | <p>4 KEGG</p> <p>8 GO BP</p> <p>0 GO CC</p> |
| 14 | <p>Pimozide</p> <p>Albendazole</p>                                                                                                                                                                                                           | 92 | 79  | <p>18 KEGG</p> <p>33 GO BP</p>              |



|    |                                                                                                                                                                                                                                                                                                          |     |     |                                             |
|----|----------------------------------------------------------------------------------------------------------------------------------------------------------------------------------------------------------------------------------------------------------------------------------------------------------|-----|-----|---------------------------------------------|
|    | <p>Lovastatin</p> <p><i>Astemizole</i></p> <p><i>Etoposide</i></p>                                                                                                                                                                                                                                       |     |     | 3 GO CC                                     |
| 15 | <p>Trimipramine</p> <p>Practolol</p> <p>Doxylamine</p> <p>Verapamil</p> <p>Carvedilol</p> <p>Paroxetine</p> <p>Protriptyline</p> <p>Chlorpromazine</p> <p>Dipyridamole</p> <p>Progesterone</p> <p><i>Sulfadimethoxine</i></p> <p><i>Cyclizine</i></p> <p><i>Repaglinide</i></p> <p><i>AHZ9RYL9EW</i></p> | 172 | 178 | <p>0 KEGG</p> <p>9 GO BP</p> <p>0 GO CC</p> |
| 17 | <p>Thiabendazole</p> <p>Leflunomide</p> <p><i>Zolpidem</i></p> <p><i>Prednisone</i></p>                                                                                                                                                                                                                  | 13  | 27  | <p>0 KEGG</p> <p>0 GO BP</p> <p>1 GO CC</p> |
| 21 | <p>Chlorthalidone</p> <p>Chloroquine</p> <p>Glipizide</p> <p>Metoprolol</p>                                                                                                                                                                                                                              | 96  | 100 | <p>1 KEGG</p> <p>5 GO BP</p> <p>3 GO CC</p> |

|    |                                                                                                                                                                                                                                                                                 |     |     |                                              |
|----|---------------------------------------------------------------------------------------------------------------------------------------------------------------------------------------------------------------------------------------------------------------------------------|-----|-----|----------------------------------------------|
|    | <p>Omeprazole</p> <p>Rofecoxib</p> <p>Metolazone</p> <p>Lidocaine</p><br><p><i>Flurbiprofen</i></p> <p><i>Cyclothiazide</i></p> <p><i>Quinethazone</i></p> <p><i>Cefoxitin</i></p>                                                                                              |     |     |                                              |
| 25 | <p>Candesartan cilexetil</p> <p>Lamotrigine</p> <p>Olmesartan medoxomil</p> <p>Dicloxacillin</p> <p>Thalidomide</p><br><p><i>Hydroxyzine</i></p> <p><i>Cefazolin</i></p> <p><i>Atenolol</i></p> <p><i>Lomefloxacin</i></p> <p><i>Pilocarpine</i></p> <p><i>Cefoperazone</i></p> | 73  | 62  | <p>4 KEGG</p> <p>12 GO BP</p> <p>2 GO CC</p> |
| 32 | <p>Etodolac</p> <p>Proguanil</p> <p>Mometasone furoate</p> <p>Clemastine</p> <p>Milrinone</p> <p>Estradiol</p> <p>Atomoxetine</p>                                                                                                                                               | 126 | 103 | <p>2 KEGG</p> <p>13 GO BP</p> <p>1 GO CC</p> |

|    |                                                                                                                                                                                                                                                                                       |    |    |                                              |
|----|---------------------------------------------------------------------------------------------------------------------------------------------------------------------------------------------------------------------------------------------------------------------------------------|----|----|----------------------------------------------|
|    | <p>Dantrolene</p> <p>Amitriptyline</p> <p>Metoclopramide</p> <p><i>Sulfamethoxazole</i></p> <p><i>Althiazide</i></p> <p><i>Azathioprine</i></p>                                                                                                                                       |    |    |                                              |
| 34 | <p>Procainamide</p> <p>Pravastatin</p> <p>Phenylbutazone</p> <p>Methocarbamol</p> <p>Nefazodone</p> <p>Mirtazapine</p> <p>Amantadine</p> <p><i>Trichlormethiazide</i></p> <p><i>Furosemide</i></p> <p><i>Acetohexamide</i></p> <p><i>Galantamine</i></p> <p><i>Chlorothiazide</i></p> | 68 | 76 | <p>0 KEGG</p> <p>13 GO BP</p> <p>0 GO CC</p> |
| 35 | <p>Penicillin g</p> <p>Cyclopenthiiazide</p> <p>Dibenzepin</p> <p><i>Carbimazole</i></p> <p><i>Ofloxacin</i></p> <p><i>Metronidazole</i></p>                                                                                                                                          | 49 | 42 | <p>0 KEGG</p> <p>0 GO BP</p> <p>3 GO CC</p>  |
| 36 | Clomethiazole                                                                                                                                                                                                                                                                         | 30 | 27 | /                                            |

|    |                                                                                                                                                                                 |    |    |                                             |
|----|---------------------------------------------------------------------------------------------------------------------------------------------------------------------------------|----|----|---------------------------------------------|
|    | <p>Enalapril</p> <p>Ketorolac</p> <p><i>Enoxacin</i></p> <p><i>Chlorzoxazone</i></p>                                                                                            |    |    |                                             |
| 37 | <p>Pentoxifylline</p> <p>Flutamide</p> <p>Diltiazem</p> <p>Ketotifen</p> <p>Estrone</p> <p><i>Diphenhydramine</i></p> <p><i>Phenytoin</i></p>                                   | 65 | 64 | <p>1 KEGG</p> <p>1 GO BP</p> <p>0 GO CC</p> |
| 38 | <p>Spirolactone</p> <p><i>Torse mide</i></p> <p><i>Gliclazide</i></p> <p><i>Meticrane</i></p> <p><i>Indapamide</i></p> <p><i>Doxazosin</i></p> <p><i>Hydroflumethiazide</i></p> | 13 | 22 | /                                           |
| 39 | <p>Cyproheptadine</p> <p>Dexamethasone</p> <p>Tolazamide</p> <p>Tinidazole</p> <p><i>Prednisolone</i></p> <p><i>Hydrocortisone acetate</i></p>                                  | 53 | 57 | <p>3 KEGG</p> <p>3 GO BP</p> <p>9 GO CC</p> |

| 41                    | Bendroflumethiazide<br>Cimetidine<br><br><i>Estrone sulfate</i><br><i>Piperacillin</i>                                | 50                                 | 55                                   | /                            |
|-----------------------|-----------------------------------------------------------------------------------------------------------------------|------------------------------------|--------------------------------------|------------------------------|
| 43                    | Meclofenamic acid<br><br><i>Chlormezanone</i><br><i>Hydrochlorothiazide</i><br><i>Ritodrine</i>                       | 15                                 | 3                                    | /                            |
| <b>CP_eTox_H_MFHC</b> |                                                                                                                       |                                    |                                      |                              |
| <b>Cluster</b>        | <b>Compounds</b>                                                                                                      | <b>Number of upregulated genes</b> | <b>Number of downregulated genes</b> | <b>Enrichment terms</b>      |
| 2                     | Papaverine<br>Flutamide<br><br><i>Azathioprine</i><br><i>Torse mide</i><br><i>Ethacrynic acid</i><br><i>Bergapten</i> | 28                                 | 32                                   | 1 KEGG<br>4 GO BP<br>1 GO CC |
| 4                     | Diltiazem<br>Famciclovir<br>Bisacodyl<br><br><i>Hydroxyzine</i><br><i>Methazolamide</i>                               | 46                                 | 43                                   | 3 KEGG<br>0 GO BP<br>1 GO CC |

|    |                                                                                                                                                                                                 |    |     |                               |
|----|-------------------------------------------------------------------------------------------------------------------------------------------------------------------------------------------------|----|-----|-------------------------------|
|    | <i>Sulfacetamide</i><br><i>Famotidine</i><br><i>Diphenylpyraline</i><br><i>Phthalylsulfathiazole</i>                                                                                            |    |     |                               |
| 8  | Pheniramine<br>Propafenone<br>Amoxapine<br>Oxaprozin<br>Doxepin<br>Pantoprazole<br>Dantrolene<br>Glipizide<br><br><i>Glafenine</i><br><i>Cloxacillin</i><br><i>Diazepam</i><br><i>Doxazosin</i> | 94 | 102 | 2 KEGG<br>11 GO BP<br>0 GO CC |
| 13 | Ticlopidine<br>Dicloxacillin<br>Sulfisoxazole<br>Trioxsalen<br>Modafinil<br><br><i>Trimethoprim</i><br><i>Gliclazide</i><br><i>Indomethacin</i>                                                 | 50 | 47  | 1 KEGG<br>3 GO BP<br>0 GO CC  |
| 15 | Mebendazole<br>Albendazole                                                                                                                                                                      | 84 | 86  | 4 KEGG<br>5 GO BP             |

|    |                                                                                                                                                                                                               |     |    |                                             |
|----|---------------------------------------------------------------------------------------------------------------------------------------------------------------------------------------------------------------|-----|----|---------------------------------------------|
|    | <p>Etodolac</p> <p>Mepivacaine</p> <p>Metaxalone</p><br><p><i>Colchicine</i></p> <p><i>AHZ9RYL9EW</i></p> <p><i>Hydralazine</i></p>                                                                           |     |    | 1 GO CC                                     |
| 18 | <p>Alrestatin</p> <p>Sildenafil</p> <p>Fluconazole</p> <p>Ketorolac</p><br><p><i>Phenytoin</i></p> <p><i>Oxybutynin</i></p> <p><i>Propylthiouracil</i></p> <p><i>Enoxacin</i></p> <p><i>Acetohexamide</i></p> | 48  | 41 | <p>1 KEGG</p> <p>2 GO BP</p> <p>0 GO CC</p> |
| 24 | <p>Protriptyline</p> <p>Amitriptyline</p> <p>Phentolamine</p> <p>Flunarizine</p> <p>Clomipramine</p>                                                                                                          | 107 | 87 | <p>0 KEGG</p> <p>0 GO BP</p> <p>2 GO CC</p> |
| 25 | <p>Riluzole</p> <p>Clemastine</p> <p>Milrinone</p> <p>Mirtazapine</p><br><p><i>Terbutaline</i></p>                                                                                                            | 36  | 53 | <p>2 KEGG</p> <p>3 GO BP</p> <p>0 GO CC</p> |

|    |                                                                                                                                                                          |     |     |                               |
|----|--------------------------------------------------------------------------------------------------------------------------------------------------------------------------|-----|-----|-------------------------------|
|    | <i>Sulfadimethoxine</i>                                                                                                                                                  |     |     |                               |
| 26 | Nefazodone<br><br><i>Chlorpropamide</i><br><i>Deferoxamine</i><br><i>Sulfamethoxazole</i><br><i>Tolazoline</i>                                                           | 11  | 6   | /                             |
| 28 | Thiotepa<br>Tamoxifen<br>Prazosin<br><br><i>Hycanthone</i><br><i>Etoposide</i><br><i>Acetazolamide</i><br><i>Astemizole</i>                                              | 55  | 40  | 1 KEGG<br>18 GO BP<br>0 GO CC |
| 32 | Fluoxetine<br>Amiodarone<br>Perphenazine<br>Loxapine<br>Atomoxetine<br>Salmeterol<br>Raloxifene<br>Triflupromazine<br>Haloperidol<br>Verapamil<br>Quinapril<br>Pizotifen | 215 | 191 | 7 KEGG<br>27 GO BP<br>4 GO CC |



|    |                                                                                                                                                                                                         |     |     |                               |
|----|---------------------------------------------------------------------------------------------------------------------------------------------------------------------------------------------------------|-----|-----|-------------------------------|
|    | <i>Propranolol</i><br><i>Cyclobenzaprine</i><br><i>Dichlorophen</i>                                                                                                                                     |     |     |                               |
| 33 | Simvastatin<br>Chlorpromazine<br>Mibefradil<br>Bepridil<br>Lovastatin<br>Trifluoperazine<br>Nortriptyline<br>Paroxetine<br>Loperamide<br>Imatinib<br><br><i>Imipramine</i><br><i>Fluvastatine</i>       | 187 | 200 | 5 KEGG<br>14 GO BP<br>1 GO CC |
| 34 | Carvedilol<br>Niridazole<br>Thiabendazole<br>Bupropion<br>Pseudoephedrine<br>Mefenamic acid<br>Praziquantel<br><br><i>Cefoxitin</i><br><i>Selegiline</i><br><i>Flurbiprofen</i><br><i>Sulfaethidole</i> | 97  | 85  | 0 KEGG<br>0 GO BP<br>1 GO CC  |

|    |                                                                                                                                                                   |    |     |                               |
|----|-------------------------------------------------------------------------------------------------------------------------------------------------------------------|----|-----|-------------------------------|
|    | <i>Repaglinide</i><br><i>Zopiclone</i>                                                                                                                            |    |     |                               |
| 36 | Risperidone<br>Fluticasone propionate<br>Pyrimethamine<br>Mometasone furoate<br>Tolmetin<br>Spironolactone<br>Pentoxifylline<br><br><i>Benazepril</i>             | 71 | 74  | 3 KEGG<br>9 GO BP<br>1 GO CC  |
| 37 | Cyproheptadine<br>Ketotifen<br>Rimexolone<br>Bendroflumethiazide<br>Primidone<br>Diclofenac<br><br><i>Atenolol</i><br><i>Sulfathiazole</i><br><i>Ketoconazole</i> | 77 | 87  | 0 KEGG<br>5 GO BP<br>0 GO CC  |
| 38 | Glyburide<br>Nimesulide<br>Testosterone propionate<br>Doxylamine<br>Proguanil                                                                                     | 97 | 106 | 1 KEGG<br>12 GO BP<br>0 GO CC |
| 40 | Enalapril                                                                                                                                                         | 27 | 16  | 0 KEGG                        |

|    |                                                                                                                                                             |     |     |                               |
|----|-------------------------------------------------------------------------------------------------------------------------------------------------------------|-----|-----|-------------------------------|
|    | Probenecid<br><br><i>Tocainide</i><br><i>Sulfamethoxypyridazine</i><br><i>Acetaminophen</i><br><i>Cinchophen</i><br><i>Liothyronine</i><br><i>Cyclizine</i> |     |     | 0 GO BP<br>2 GO CC            |
| 42 | Methysergide<br>Propofol<br><br><i>Aceclofenac</i><br><i>Valacyclovir</i><br><i>Azelastine</i>                                                              | 27  | 20  | /                             |
| 43 | Diflunisal<br>Dexamethasone<br>Rofecoxib<br>Chloroquine<br>Brinzolamide<br><br><i>Cefazolin</i><br><i>Pilocarpine</i><br><i>Letrozole</i>                   | 257 | 405 | 8 KEGG<br>18 GO BP<br>2 GO CC |
| 44 | Omeprazole<br>Prochlorperazine<br>Tinidazole<br>Diazoxide                                                                                                   | 47  | 62  | 0 KEGG<br>0 GO BP<br>1 GO CC  |

|    |                                                                                                                                                                                                                                                             |    |    |                              |
|----|-------------------------------------------------------------------------------------------------------------------------------------------------------------------------------------------------------------------------------------------------------------|----|----|------------------------------|
|    | <i>Cefoperazone</i><br><i>Indapamide</i><br><i>Adenosine</i><br><i>Azactam</i><br><i>Carbimazole</i><br><i>Metyrapone</i><br><i>Pentobarbital</i><br><i>4-Phenylbutyric acid</i><br><i>Baclofen</i>                                                         |    |    |                              |
| 45 | Triamcinolone<br>Leflunomide<br>Ondansetron<br><br><i>Ritodrine</i><br><i>Tolfenamic acid</i><br><i>Diphenhydramine</i><br><i>Prednisone</i><br><i>Zomepirac</i><br><i>Valdecoxib</i><br><i>Methapyrilene</i><br><i>Nomifensine</i><br><i>Ciprofloxacin</i> | 38 | 35 | 0 KEGG<br>2 GO BP<br>1 GO CC |
| 46 | Olmesartan medoxomil<br>Beclomethasone dipropionate<br>Amiloride<br><br><i>Zolpidem</i><br><i>Prednisolone</i>                                                                                                                                              | 34 | 29 | 3 KEGG<br>0 GO BP<br>3 GO CC |

|    |                                                                                                                                                                          |     |     |                              |
|----|--------------------------------------------------------------------------------------------------------------------------------------------------------------------------|-----|-----|------------------------------|
|    | <i>Piperacillin</i><br><i>Hydrocortisone acetate</i>                                                                                                                     |     |     |                              |
| 49 | Lidocaine<br>Metolazone<br>Dexamethasone acetate<br><br><i>Galantamine</i><br><i>Phenacemide</i>                                                                         | 34  | 52  | 0 KEGG<br>1 GO BP<br>2 GO CC |
| 53 | Saquinavir<br>Metoprolol<br>Fexofenadine<br>Candesartan cilexetil<br>Mexiletine<br>Phenylbutazone<br><br><i>Lomefloxacin</i><br><i>Zonisamide</i><br><i>Sulfadiazine</i> | 68  | 55  | 0 KEGG<br>1 GO BP<br>0 GO CC |
| 58 | Domperidone<br>Pravastatin<br>Trazodone<br>Buspirone<br>Clozapine<br>Dibenzepin<br>Nafcillin                                                                             | 58  | 63  | 0 KEGG<br>7 GO BP<br>2 GO CC |
| 59 | Digoxin<br>Daunorubicin                                                                                                                                                  | 416 | 422 | 8 KEGG<br>41 GO BP           |

|    |                                                                                                       |     |     |                                |
|----|-------------------------------------------------------------------------------------------------------|-----|-----|--------------------------------|
|    | Perindopril<br>Caffeine<br><i>Suprofen</i>                                                            |     |     | 10 GO CC                       |
| 60 | Bumetanide<br>Naproxen<br>Disopyramide<br>Thalidomide<br>Celecoxib                                    | 113 | 121 | 6 KEGG<br>26 GO BP<br>14 GO CC |
| 62 | Gatifloxacin<br>Valsartan<br>Benzbromarone<br>Flecainide<br><i>Aminopyrine</i><br><i>Theophylline</i> | 46  | 48  | /                              |

**Table S10.** Details of the number of Cell Painting features based clusters and their mean size.

|                   | Number of final valid clusters<br>( $\geq 4$ compounds) | Mean size of final valid<br>clusters ( $\geq 4$ compounds) |
|-------------------|---------------------------------------------------------|------------------------------------------------------------|
| CP_DILIs_pos_neg  | 15                                                      | 7                                                          |
| CP_DILIs_most_neg | 6                                                       | 4.3                                                        |
| CP_eTox_H_HT      | 31                                                      | 10                                                         |
| CP_eTox_H_MF      | 34                                                      | 7.1                                                        |
| CP_eTox_H_MFHB    | 22                                                      | 7.4                                                        |

|                |    |     |
|----------------|----|-----|
| CP_eTox_H_MFHC | 28 | 8.1 |
|----------------|----|-----|

**Table S11.** Comparison of machine learning models for hepatotoxicity prediction based on Cell Painting features. Balanced accuracies (BA), sensitivities (SN) and specificities (SP) were calculated during cross-validation (mean of scores across all folds), on the training set and on the validation set. Selected features refer to features remaining after the feature selection step.

| Dataset          |                  | Random Forest                       | Linear SVM                          | ElasticNet                          |
|------------------|------------------|-------------------------------------|-------------------------------------|-------------------------------------|
| All features     |                  |                                     |                                     |                                     |
| CP_DILIs_pos_neg | Cross Validation | BA: 0.506<br>SN: 0.984<br>SP: 0.027 | BA: 0.502<br>SN: 0.699<br>SP: 0.305 | BA: 0.493<br>SN: 0.53<br>SP: 0.457  |
|                  | Training set     | BA: 1<br>SN: 1<br>SP: 1             | BA: 1<br>SN: 1<br>SP: 1             | BA: 0.809<br>SN: 0.725<br>SP: 0.893 |
|                  | Validation set   | BA: 0.464<br>SN: 0.929<br>SP: 0     | BA: 0.371<br>SN: 0.643<br>SP: 0.099 | BA: 0.436<br>SN: 0.571<br>SP: 0.301 |

|                   |                  |                                     |                                     |                                     |
|-------------------|------------------|-------------------------------------|-------------------------------------|-------------------------------------|
| CP_DILIs_most_neg | Cross Validation | BA: 0.518<br>SN: 0.404<br>SP: 0.632 | BA: 0.523<br>SN: 0.448<br>SP: 0.598 | BA: 0.511<br>SN: 0.515<br>SP: 0.507 |
|                   | Training set     | BA: 1<br>SN: 1<br>SP: 1             | BA: 1<br>SN: 1<br>SP: 1             | BA: 1<br>SN: 1<br>SP: 1             |
|                   | Validation set   | BA: 0.522<br>SN: 0.444<br>SP: 0.6   | BA: 0.478<br>SN: 0.556<br>SP: 0.4   | BA: 0.583<br>SN: 0.667<br>SP: 0.499 |
| CP_eTox_H_HT      | Cross Validation | BA: 0.5<br>SN: 1<br>SP: 0           | BA: 0.502<br>SN: 0.727<br>SP: 0.279 | BA: 0.477<br>SN: 0.671<br>SP: 0.283 |
|                   | Training set     | BA: 1<br>SN: 1<br>SP: 1             | BA: 1<br>SN: 1<br>SP: 1             | BA: 0.981<br>SN: 0.962<br>SP: 1     |
|                   | Validation set   | BA: 0.5<br>SN: 1<br>SP: 0           | BA: 0.472<br>SN: 0.786<br>SP: 0.158 | BA: 0.532<br>SN: 0.696<br>SP: 0.368 |
| CP_eTox_H_MF      | Cross Validation | BA: 0.501<br>SN: 0.982<br>SP: 0.02  | BA: 0.481<br>SN: 0.659<br>SP: 0.303 | BA: 0.471<br>SN: 0.441<br>SP: 0.5   |
|                   | Training set     | BA: 1<br>SN: 1<br>SP: 1             | BA: 1<br>SN: 1<br>SP: 1             | BA: 0.657<br>SN: 0.549<br>SP: 0.765 |
|                   | Validation set   | BA: 0.479<br>SN: 0.958<br>SP: 0     | BA: 0.572<br>SN: 0.708<br>SP: 0.436 | BA: 0.587<br>SN: 0.521<br>SP: 0.653 |
| CP_eTox_H_MFHB    | Cross Validation | BA: 0.52<br>SN: 0.283<br>SP: 0.757  | BA: 0.493<br>SN: 0.472<br>SP: 0.514 | BA: 0.503<br>SN: 0.472<br>SP: 0.536 |
|                   | Training set     | BA: 1<br>SN: 1<br>SP: 1             | BA: 1<br>SN: 1<br>SP: 1             | BA: 0.725<br>SN: 0.689<br>SP: 0.761 |



|                   |                  |                                            |                                          |                                          |
|-------------------|------------------|--------------------------------------------|------------------------------------------|------------------------------------------|
|                   | Validation set   | BA: 0.356<br>SN: 0.062<br>SP: 0.65         | BA: 0.46<br>SN: 0.406<br>SP: 0.514       | BA: 0.409<br>SN: 0.25<br>SP: 0.568       |
| CP_eTox_H_MFHC    | Cross Validation | BA: 0.562<br>SN: 0.802<br>SP: 0.323        | BA: 0.506<br>SN: 0.566<br>SP: 0.446      | BA: 0.526<br>SN: 0.467<br>SP: 0.585      |
|                   | Training set     | BA: 0.994<br>SN: 1<br>SP: 0.988            | BA: 1<br>SN: 1<br>SP: 1                  | BA: 0.678<br>SN: 0.601<br>SP: 0.755      |
|                   | Validation set   | BA: 0.376<br>SN: 0.674<br>SP: 0.078        | BA: 0.414<br>SN: 0.558<br>SP: 0.27       | BA: 0.375<br>SN: 0.442<br>SP: 0.308      |
| Selected features |                  |                                            |                                          |                                          |
| CP_DILIs_pos_neg  | Cross Validation | BA: 0.573<br>SN: 0.95<br>SP: 0.198         | BA: 0.567<br>SN: 0.732<br>SP: 0.402      | BA: 0.59<br>SN: 0.611<br>SP: 0.569       |
|                   | Training set     | BA: 1<br>SN: 1<br>SP: 1                    | BA: 0.987<br>SN: 0.974<br>SP: 1          | BA: 0.737<br>SN: 0.706<br>SP: 0.768      |
|                   | Validation set   | BA: <b>0.646</b><br>SN: 0.893<br>SP: 0.399 | BA: 0.475<br>SN: 0.75<br>SP: 0.2         | BA: 0.521<br>SN: 0.643<br>SP: 0.399      |
| CP_DILIs_most_neg | Cross Validation | BA: 0.567<br>SN: 0.468<br>SP: 0.666        | BA: 0.567<br>SN: 0.554<br>SP: 0.579      | BA: 0.603<br>SN: 0.593<br>SP: 0.614      |
|                   | Training set     | BA: 1<br>SN: 1<br>SP: 1                    | BA: 1<br>SN: 1<br>SP: 1                  | BA: 0.676<br>SN: 0.638<br>SP: 0.714      |
|                   | Validation set   | BA: <b>0.739</b><br>SN: 0.778<br>SP: 0.7   | BA: <b>0.739</b><br>SN: 0.778<br>SP: 0.7 | BA: <b>0.689</b><br>SN: 0.778<br>SP: 0.6 |
| CP_eTox_H_HT      | Cross Validation | BA: 0.537<br>SN: 0.887                     | BA: 0.555<br>SN: 0.567                   | BA: 0.57<br>SN: 0.558                    |

|                |                  |                                     |                                            |                                           |
|----------------|------------------|-------------------------------------|--------------------------------------------|-------------------------------------------|
|                |                  | SP: 0.187                           | SP: 0.543                                  | SP: 0.581                                 |
|                | Training set     | BA: 0.917<br>SN: 0.969<br>SP: 0.865 | BA: 0.642<br>SN: 0.639<br>SP: 0.645        | BA: 0.626<br>SN: 0.589<br>SP: 0.663       |
|                | Validation set   | BA: 0.499<br>SN: 0.839<br>SP: 0.159 | BA: <b>0.645</b><br>SN: 0.554<br>SP: 0.736 | BA: 0.566<br>SN: 0.554<br>SP: 0.578       |
| CP_eTox_H_MF   | Cross Validation | BA: 0.529<br>SN: 0.819<br>SP: 0.24  | BA: 0.533<br>SN: 0.581<br>SP: 0.485        | BA: 0.541<br>SN: 0.573<br>SP: 0.509       |
|                | Training set     | BA: 0.966<br>SN: 0.963<br>SP: 0.969 | BA: 0.679<br>SN: 0.648<br>SP: 0.71         | BA: 0.661<br>SN: 0.63<br>SP: 0.692        |
|                | Validation set   | BA: 0.507<br>SN: 0.667<br>SP: 0.347 | BA: 0.575<br>SN: 0.542<br>SP: 0.608        | BA: <b>0.65</b><br>SN: 0.604<br>SP: 0.696 |
| CP_eTox_H_MFHB | Cross Validation | BA: 0.6<br>SN: 0.469<br>SP: 0.731   | BA: 0.565<br>SN: 0.531<br>SP: 0.6          | BA: 0.59<br>SN: 0.542<br>SP: 0.638        |
|                | Training set     | BA: 1<br>SN: 1<br>SP: 1             | BA: 0.702<br>SN: 0.667<br>SP: 0.737        | BA: 0.656<br>SN: 0.617<br>SP: 0.695       |
|                | Validation set   | BA: 0.576<br>SN: 0.531<br>SP: 0.621 | BA: 0.576<br>SN: 0.531<br>SP: 0.621        | BA: 0.516<br>SN: 0.438<br>SP: 0.594       |
| CP_eTox_H_MFHC | Cross Validation | BA: 0.582<br>SN: 0.712<br>SP: 0.452 | BA: 0.533<br>SN: 0.549<br>SP: 0.517        | BA: 0.555<br>SN: 0.465<br>SP: 0.646       |
|                | Training set     | BA: 0.949<br>SN: 0.926<br>SP: 0.972 | BA: 0.701<br>SN: 0.667<br>SP: 0.735        | BA: 0.633<br>SN: 0.519<br>SP: 0.747       |
|                | Validation set   | BA: 0.522<br>SN: 0.698              | BA: 0.445<br>SN: 0.581                     | BA: 0.49<br>SN: 0.442                     |

|  |  |           |           |           |
|--|--|-----------|-----------|-----------|
|  |  | SP: 0.346 | SP: 0.309 | SP: 0.538 |
|--|--|-----------|-----------|-----------|

**Table S12.** Percentage of balanced accuracies higher after training and prediction on a permuted dataset than after training and prediction on the non-permuted dataset.

|                          | <b>Random Forest</b> | <b>Linear SVM</b> | <b>ElasticNet</b> |
|--------------------------|----------------------|-------------------|-------------------|
| <b>CP_DILIs_pos_neg</b>  | 0                    | 60                | 32                |
| <b>CP_DILIs_most_neg</b> | 0                    | 1                 | 2                 |
| <b>CP_eTox_H_HT</b>      | 49                   | 1                 | 16                |
| <b>CP_eTox_H_MF</b>      | 42                   | 12                | 0                 |
| <b>CP_eTox_H_MFHB</b>    | 7                    | 6                 | 40                |
| <b>CP_eTox_H_MFHC</b>    | 15                   | 82                | 55                |

**Table S13.** Machine learning models performance for hepatotoxicity prediction based on Cell Painting features with Recursive Feature Elimination (RFE) included in the loop of training. RFE estimator used is a Random Forest algorithm. Stratified 2 times 5-fold cross-validation was included in the training procedure. Balanced accuracies (BA), sensitivities (SN) and specificities (SP) were calculated during cross-validation (mean of scores across all folds), on the training set and on the validation set.

| Dataset          |                  | ElasticNet                          |
|------------------|------------------|-------------------------------------|
| CP_DILIs_pos_neg | Cross Validation | BA: 0.523<br>SN: 0.533<br>SP: 0.519 |
|                  | Training set     | BA: 0.769<br>SN: 0.699<br>SP: 0.839 |
|                  | Validation set   | BA: 0.468                           |

|                   |                  |                                     |
|-------------------|------------------|-------------------------------------|
|                   |                  | SN: 0.536<br>SP: 0.4                |
| CP_DILIs_most_neg | Cross Validation | BA: 0.587<br>SN: 0.594<br>SP: 0.58  |
|                   | Training set     | BA: 0.989<br>SN: 0.979<br>SP: 0.999 |
|                   | Validation set   | BA: 0.522<br>SN: 0.444<br>SP: 0.6   |
| CP_eTox_H_HT      | Cross Validation | BA: 0.508<br>SN: 0.671<br>SP: 0.346 |
|                   | Training set     | BA: 0.976<br>SN: 0.953<br>SP: 0.999 |
|                   | Validation set   | BA: 0.507<br>SN: 0.75<br>SP: 0.264  |
| CP_eTox_H_MF      | Cross Validation | BA: 0.545<br>SN: 0.614<br>SP: 0.477 |
|                   | Training set     | BA: 0.559<br>SN: 0.623<br>SP: 0.495 |
|                   | Validation set   | BA: 0.349<br>SN: 0.438<br>SP: 0.26  |
| CP_eTox_H_MFHB    | Cross Validation | BA: 0.582<br>SN: 0.542<br>SP: 0.621 |
|                   | Training set     | BA: 0.621                           |

|                |                  |                                     |
|----------------|------------------|-------------------------------------|
|                |                  | SN: 0.594<br>SP: 0.648              |
|                | Validation set   | BA: 0.532<br>SN: 0.469<br>SP: 0.595 |
| CP_eTox_H_MFHC | Cross Validation | BA: 0.513<br>SN: 0.634<br>SP: 0.392 |
|                | Training set     | BA: 0.531<br>SN: 0.675<br>SP: 0.387 |
|                | Validation set   | BA: 0.471<br>SN: 0.558<br>SP: 0.384 |

**Table S14.** Randomly created cluster details and gene enrichment results. Compounds without gene expression data are displayed in italic.

| CP_DILIs_pos_neg |                                                                                                         |                               |                             |                              |
|------------------|---------------------------------------------------------------------------------------------------------|-------------------------------|-----------------------------|------------------------------|
| Cluster          | Compounds                                                                                               | Number of downregulated genes | Number of upregulated genes | Enrichment terms             |
| 1                | Cetirizine<br>Metoclopramide<br>Fluoxetine<br>Famnidamol<br><i>Azathioprine</i><br><i>Levothyroxine</i> | 88                            | 59                          | 3 KEGG<br>8 GO BP<br>2 GO CC |

|   |                                                                                                                                               |     |     |                               |
|---|-----------------------------------------------------------------------------------------------------------------------------------------------|-----|-----|-------------------------------|
|   | <i>Sulfamethizole</i><br><i>Isradipine</i>                                                                                                    |     |     |                               |
| 2 | Risperidone<br>Pantoprazole<br>Doxorubicin<br>Cyproheptadine<br>Carvedilol<br>Propofol<br><br><i>Chlorothiazide</i><br><i>Bromocriptine</i>   | 129 | 85  | 0 KEGG<br>2 GO BP<br>0 GO CC  |
| 3 | Bendroflumethiazide<br>Valsartan<br>Atomoxetine<br>Diflunisal<br>Venlafaxine<br><i>Methoxsalen</i><br><i>Ethionamide</i><br><i>Cinchophen</i> | 267 | 405 | 8 KEGG<br>14 GO BP<br>4 GO CC |
| 4 | Pravastatin<br>Tolazamide<br>Metoprolol<br>Benzbromarone<br>Etodolac<br><br><i>Zidovudine</i><br><i>Cefdinir</i><br><i>Aceclofenac</i>        | 90  | 83  | 4 KEGG<br>11 GO BP<br>1 GO CC |

|   |                                                                                                                                                                                              |     |     |                                             |
|---|----------------------------------------------------------------------------------------------------------------------------------------------------------------------------------------------|-----|-----|---------------------------------------------|
| 5 | <p>Labetalol</p> <p>Clozapine</p> <p>Isotretinoin</p> <p>Enalapril</p> <p><i>Cyclobenzaprine</i></p> <p><i>Imipramine</i></p> <p><i>Clotrimazole</i></p> <p><i>Warfarin</i></p>              | 90  | 81  | <p>1 KEGG</p> <p>2 GO BP</p> <p>0 GO CC</p> |
| 6 | <p>Thalidomide</p> <p>Procainamide</p> <p>Alfuzosin</p> <p>Chloroquine</p> <p><i>Methylprednisolone</i></p> <p><i>Metronidazole</i></p> <p><i>Letrozole</i></p> <p><i>Chlorcyclizine</i></p> | 66  | 62  | <p>2 KEGG</p> <p>9 GO BP</p> <p>4 GO CC</p> |
| 7 | <p>Haloperidol</p> <p>Danazol</p> <p>Citalopram</p> <p>Nimesulide</p> <p>Riluzole</p> <p>Propafenone</p> <p><i>Etoposide</i></p>                                                             | 109 | 137 | <p>2 KEGG</p> <p>3 GO BP</p> <p>2 GO CC</p> |
| 8 | <p>Amlodipine</p> <p>Carbamazepine</p>                                                                                                                                                       | 90  | 95  | <p>3 KEGG</p> <p>1 GO BP</p>                |

|    |                                                                                                                                            |     |    |                                               |
|----|--------------------------------------------------------------------------------------------------------------------------------------------|-----|----|-----------------------------------------------|
|    | <p>Finasteride</p> <p>Simvastatin</p> <p><i>Phenytoin</i></p> <p><i>Mefloquine</i></p> <p><i>Indomethacin</i></p>                          |     |    | 2 GO CC                                       |
| 9  | <p>Lovastatin</p> <p>Ropinirole</p> <p>Nilutamide</p> <p>Penicillin g</p> <p>Imatinib</p> <p><i>Glafenine</i></p> <p><i>Dapsone</i></p>    | 105 | 83 | <p>5 KEGG</p> <p>4 GO BP</p> <p>3 GO CC</p>   |
| 10 | <p>Tamoxifen</p> <p>Mitoxantrone</p> <p>Amiloride</p> <p>Glyburide</p> <p>Sirolimus</p> <p><i>Cefoperazone</i></p> <p><i>Ofloxacin</i></p> | 105 | 83 | <p>3 KEGG</p> <p>61 GO BP</p> <p>15 GO CC</p> |
| 11 | <p>Disulfiram</p> <p>Ondansetron</p> <p>Valacyclovir</p> <p>Sildenafil</p> <p>Mirtazapine</p> <p>Ibuprofen</p>                             | 49  | 37 | <p>0 KEGG</p> <p>1 GO BP</p> <p>0 GO CC</p>   |



|    |                                                                                                                                     |     |    |                               |
|----|-------------------------------------------------------------------------------------------------------------------------------------|-----|----|-------------------------------|
|    | Repaglinide                                                                                                                         |     |    |                               |
| 12 | Pyrimethamine<br>Celecoxib<br>Verapamil<br><br>Norfloxacin<br><i>Propylthiouracil</i><br><i>Lansoprazole</i><br><i>Deferoxamine</i> | 48  | 51 | 1 KEGG<br>14 GO BP<br>0 GO CC |
| 13 | Flutamide<br>Fluconazole<br>Triamterene<br>Flecainide<br><br><i>Nomifensine</i><br><i>Trimethoprim</i><br><i>Hydralazine</i>        | 47  | 52 | 0 KEGG<br>1 GO BP<br>4 GO CC  |
| 14 | Diltiazem<br>Trazodone<br>Tinidazole<br>Nefazodone<br>Nialamide<br><br><i>Acetazolamide</i><br><i>Atenolol</i>                      | 110 | 97 | /                             |
| 15 | Dicloxacillin<br><br>Oxaprozin                                                                                                      | 80  | 66 | 0 KEGG<br>4 GO BP             |

|    |                                                                                                                                                            |    |    |                                             |
|----|------------------------------------------------------------------------------------------------------------------------------------------------------------|----|----|---------------------------------------------|
|    | <p>Omeprazole</p> <p>Quinapril</p> <p><i>Chlorpropamide</i></p> <p><i>Gemifloxacin</i></p> <p><i>Ciprofloxacin</i></p>                                     |    |    | 1 GO CC                                     |
| 16 | <p>Diclofenac</p> <p>Dantrolene</p> <p>Clomipramine</p> <p>Thiotepa</p> <p><i>Chlormezanone</i></p> <p><i>Famotidine</i></p> <p><i>Cefazolin</i></p>       | 60 | 53 | <p>1 KEGG</p> <p>3 GO BP</p> <p>1 GO CC</p> |
| 17 | <p>Amitriptyline</p> <p>Mefenamic acid</p> <p>Ketorolac</p> <p>Paclitaxel</p> <p><i>Cloxacillin</i></p> <p><i>Baclofen</i></p> <p><i>Sulfathiazole</i></p> | 54 | 50 | <p>2 KEGG</p> <p>4 GO BP</p> <p>0 GO CC</p> |
| 18 | <p>Doxepin</p> <p>Albendazole</p> <p>Ticlopidine</p> <p>Nafcillin</p> <p><i>Methazolamide</i></p>                                                          | 32 | 40 | <p>0 KEGG</p> <p>3 GO BP</p> <p>0 GO CC</p> |

|    |                                                                                                                                                        |    |     |                               |
|----|--------------------------------------------------------------------------------------------------------------------------------------------------------|----|-----|-------------------------------|
|    | <i>Sulfadiazine</i><br><i>Zonisamide</i>                                                                                                               |    |     |                               |
| 19 | Metaxalone<br><br><i>Nitrofurantoin</i><br><i>Chlorzoxazone</i><br><i>Cefuroxime</i><br><i>Paclitaxel</i><br><i>Prednisone</i><br><i>cyclosporin A</i> | /  | /   | /                             |
| 20 | Amiodarone<br>Ketoprofen<br>Mebendazole<br>Bupropion<br><br><i>Hydrochlorothiazide</i><br><i>Terbutaline</i><br><i>Fipexide</i>                        | 78 | 84  | 0 KEGG<br>37 GO BP<br>1 GO CC |
| 21 | Mexiletine<br>Disopyramide<br>Paroxetine<br>Glipizide<br>Progesterone<br><br><i>Iproniazid</i><br><i>Acebutolol</i>                                    | 98 | 94  | 2 KEGG<br>4 GO BP<br>8 GO CC  |
| 22 | Estradiol                                                                                                                                              | 85 | 104 | 2 KEGG                        |

|    |                                                                                                                                                           |    |    |                                             |
|----|-----------------------------------------------------------------------------------------------------------------------------------------------------------|----|----|---------------------------------------------|
|    | <p>Modafinil</p> <p>Chlorpromazine</p> <p>Spirolactone</p> <p>Naproxen</p> <p>Thiabendazole</p> <p><i>Prednisolone</i></p>                                |    |    | <p>7 GO BP</p> <p>0 GO CC</p>               |
| 23 | <p>Leflunomide</p> <p>Lamotrigine</p> <p>Felodipine</p> <p>Papaverine</p> <p>Prochlorperazine</p> <p><i>Moxisylyte</i></p> <p><i>Acetaminophen</i></p>    | 44 | 59 | <p>0 KEGG</p> <p>9 GO BP</p> <p>0 GO CC</p> |
| 24 | <p>Tolmetin</p> <p>Perphenazine</p> <p>Glimepiride</p> <p><i>Sulindac</i></p> <p><i>Cefotaxime</i></p> <p><i>Levofloxacin</i></p> <p><i>Captopril</i></p> | 47 | 49 | <p>1 KEGG</p> <p>2 GO BP</p> <p>0 GO CC</p> |
| 25 | <p>Fenofibrate</p> <p>Cimetidine</p> <p>Nortriptyline</p> <p>Saquinavir</p>                                                                               | 63 | 58 | <p>3 KEGG</p> <p>5 GO BP</p> <p>1 GO CC</p> |

|                          | <i>Gemfibrozil</i><br><i>Benazepril</i><br><i>Valdecoxib</i>                              |                                    |                                      |                               |
|--------------------------|-------------------------------------------------------------------------------------------|------------------------------------|--------------------------------------|-------------------------------|
| <b>CP_DILIs_most_neg</b> |                                                                                           |                                    |                                      |                               |
| <b>Cluster</b>           | <b>Compounds</b>                                                                          | <b>Number of upregulated genes</b> | <b>Number of downregulated genes</b> | <b>Enrichment terms</b>       |
| 1                        | <i>Thiabendazole</i><br><i>Leflunomide</i><br><i>Chlorzoxazone</i><br><i>Levofloxacin</i> | 13                                 | 27                                   | 0 KEGG<br>0 GO BP<br>1 GO CC  |
| 2                        | <i>Atomoxetine</i><br><i>Carbamazepine</i><br><i>Diflunisal</i><br><i>Zidovudine</i>      | 250                                | 389                                  | 6 KEGG<br>13 GO BP<br>5 GO CC |
| 3                        | <i>Albendazole</i><br><i>Clomipramine</i><br><i>Labetalol</i><br><i>Fipexide</i>          | 61                                 | 48                                   | 3 KEGG<br>1 GO BP<br>0 GO CC  |
| 4                        | <i>Benzbromarone</i><br><i>Etodolac</i><br><i>cyclosporin A</i>                           | 54                                 | 43                                   | /                             |

|    |                                                                                    |    |    |                              |
|----|------------------------------------------------------------------------------------|----|----|------------------------------|
|    | <i>Iproniazid</i>                                                                  |    |    |                              |
| 5  | Clozapine<br>Fluconazole<br><br><i>Cinchophen</i><br><i>Sulfathiazole</i>          | 23 | 18 | /                            |
| 6  | Diclofenac<br>Danazol<br><br><i>Glafenine</i><br><i>Sulindac</i>                   | 47 | 40 | 0 KEGG<br>0 GO BP<br>3 GO CC |
| 7  | Mexiletine<br>Nilutamide<br><br><i>Phenytoin</i><br><i>Gemfibrozil</i>             | 26 | 24 | 1 KEGG<br>5 GO BP<br>0 GO CC |
| 8  | Amiodarone<br><br><i>Moxisylyte</i><br><i>Nitrofurantoin</i><br><i>Nomifensine</i> | /  | /  | /                            |
| 9  | Falnidamol<br>Riluzole<br>Nortriptyline<br>Flutamide                               | 65 | 53 | 0 KEGG<br>3 GO BP<br>3 GO CC |
| 10 | Diltiazem                                                                          | 21 | 17 | 1 KEGG                       |

|                     |                                                                                      |                  |                  |                               |
|---------------------|--------------------------------------------------------------------------------------|------------------|------------------|-------------------------------|
|                     | Ticlopidine<br><br><i>Ciprofloxacin</i><br><i>Indomethacin</i>                       |                  |                  | 0 GO BP<br>0 GO CC            |
| 11                  | Tamoxifen<br>Lamotrigine<br>Mefenamic acid<br><br><i>Azathioprine</i>                | 41               | 29               | 3 KEGG<br>12 GO BP<br>0 GO CC |
| 12                  | Imatinib<br><br><i>Acetazolamide</i><br><i>Disulfiram</i><br><i>Propylthiouracil</i> | /                | /                | /                             |
| 13                  | Isotretinoin<br>Nialamide<br>Nimesulide<br><br><i>Chlormezanone</i>                  | 108              | 96               | 0 KEGG<br>0 GO BP<br>0 GO CC  |
| 14                  | Dantrolene<br>Papaverine<br>Nefazodone<br><br><i>Acetaminophen</i>                   | 26               | 35               | 1 KEGG<br>17 GO BP<br>0 GO CC |
| <b>CP_eTox_H_HT</b> |                                                                                      |                  |                  |                               |
| <b>Cluster</b>      | <b>Compounds</b>                                                                     | <b>Number of</b> | <b>Number of</b> | <b>Enrichment</b>             |

|   |                                                                                                                                                                                                      | <b>upregulated<br/>genes</b> | <b>downregulated<br/>genes</b> | <b>terms</b>                  |
|---|------------------------------------------------------------------------------------------------------------------------------------------------------------------------------------------------------|------------------------------|--------------------------------|-------------------------------|
| 1 | Metoclopramide<br>Bendroflumethiazide<br>Enalapril<br>Methysergide<br>Doxepin<br>Mexiletine<br>Promazine<br><br><i>Torsemide</i><br><i>Etoposide</i><br><i>Chlorzoxazone</i><br><i>Sulfamerazine</i> | 86                           | 93                             | 3 KEGG<br>3 GO BP<br>0 GO CC  |
| 2 | Carteolol<br>Risperidone<br>Talniflumate<br>Spironolactone<br><br><i>Loratadine</i><br><i>Prednisolone</i><br><i>Periciazine</i><br><i>Cefoxitin</i><br><i>Nabumetone</i><br><i>Dapsone</i>          | 41                           | 66                             | 1 KEGG<br>6 GO BP<br>1 GO CC  |
| 3 | Atomoxetine<br>Tamoxifen<br>Amoxapine                                                                                                                                                                | 105                          | 97                             | 0 KEGG<br>11 GO BP<br>3 GO CC |



|   |                                                                                                                                                                                                            |    |    |                                              |
|---|------------------------------------------------------------------------------------------------------------------------------------------------------------------------------------------------------------|----|----|----------------------------------------------|
|   | <p>Sertaconazole</p> <p>Trioxsalen</p> <p>Mibefradil</p> <p>Guanfacine</p> <p>Papaverine</p> <p><i>AHZ9RYL9EW</i></p> <p><i>Gemfibrozil</i></p> <p><i>Xylometazoline</i></p>                               |    |    |                                              |
| 4 | <p>Betahistine</p> <p>Famciclovir</p> <p>Trimipramine</p> <p>Quinapril</p> <p>Probenecid</p> <p>Danthron</p> <p>Perindopril</p> <p>Leflunomide</p> <p><i>Chlormezanone</i></p> <p><i>Pentobarbital</i></p> | 85 | 87 | <p>3 KEGG</p> <p>0 GO BP</p> <p>0 GO CC</p>  |
| 5 | <p>Mepivacaine</p> <p>Isocarboxazid</p> <p>Pizotifen</p> <p>Cefotiam</p> <p>Saquinavir</p> <p>Statil</p> <p><i>Zonisamide</i></p>                                                                          | 68 | 73 | <p>5 KEGG</p> <p>17 GO BP</p> <p>1 GO CC</p> |

|   |                                                                                                                                                                                                |    |    |                              |
|---|------------------------------------------------------------------------------------------------------------------------------------------------------------------------------------------------|----|----|------------------------------|
|   | <i>Glafenine</i><br><i>Fipexide</i><br><i>Diphenylpyraline</i><br><i>Furosemide</i>                                                                                                            |    |    |                              |
| 6 | Mebendazole<br>Trimethobenzamide<br>Simvastatin<br>Propafenone<br>Haloperidol<br><br><i>Chlorothiazide</i><br><i>Valdecoxib</i><br><i>Azathioprine</i><br><i>Zolpidem</i><br><i>Iproniazid</i> | 94 | 99 | 4 KEGG<br>3 GO BP<br>0 GO CC |
| 7 | Buspirone<br>Amantadine<br>Sildenafil<br>Propofol<br>Lidocaine<br>Cyproheptadine<br><br><i>Cloxacillin</i><br><i>Hydroflumethiazide</i><br><i>Sulfaethidole</i><br><i>Baclofen</i>             | 74 | 79 | 0 KEGG<br>1 GO BP<br>5 GO CC |
| 8 | Finasteride                                                                                                                                                                                    | /  | /  | /                            |

|    |                                                                                                                                                                                                |     |     |                               |
|----|------------------------------------------------------------------------------------------------------------------------------------------------------------------------------------------------|-----|-----|-------------------------------|
|    | <i>Clidinium</i><br><i>Metaproterenol</i><br><i>Hydrochlorothiazide</i><br><i>Imipramine</i><br><i>Fluvastatine</i><br><i>Metamizole</i><br><i>Tegaserod</i>                                   |     |     |                               |
| 9  | Candesartan cilexetil<br>Dicloxacillin<br>Caffeine<br>Estradiol<br>Daunorubicin<br>Mesoridazine<br><br><i>Methylergonovine</i><br><i>Almotriptan</i><br><i>Terbutaline</i><br><i>Zomepirac</i> | 443 | 405 | 8 KEGG<br>41 GO BP<br>9 GO CC |
| 10 | Bumetanide<br>Naftidrofuryl<br>Methocarbamol<br>Clomipramine<br>Protriptyline<br>Niridazole<br><br><i>Ethionamide</i><br><i>Galantamine</i><br><i>Cefazolin</i>                                | 119 | 121 | 0 KEGG<br>5 GO BP<br>0 GO CC  |

|    |                                                                                                                                                                                         |     |     |                               |
|----|-----------------------------------------------------------------------------------------------------------------------------------------------------------------------------------------|-----|-----|-------------------------------|
|    | <i>Trimethoprim</i>                                                                                                                                                                     |     |     |                               |
| 11 | Verapamil<br>Dexamethasone acetate<br>Mometasone furoate<br>Pindolol<br>Glyburide<br>Chlorthalidone<br>Doxylamine<br>Fluconazole<br><br><i>Acetazolamide</i><br><i>Sulfamethoxazole</i> | 147 | 165 | 6 KEGG<br>15 GO BP<br>5 GO CC |
| 12 | Albendazole<br>Amitriptyline<br>Imatinib<br>Nefazodone<br>Fexofenadine<br><br><i>Zopiclone</i><br><i>Valacyclovir</i><br><i>Ketoconazole</i><br><i>Piribedil</i><br><i>Sulfadiazine</i> | 61  | 53  | 1 KEGG<br>11 GO BP<br>1 GO CC |
| 13 | Ketotifen<br>Bromhexine<br>Venlafaxine<br>Proguanil<br>Thiabendazole                                                                                                                    | 71  | 80  | 2 KEGG<br>0 GO BP<br>3 GO CC  |

|    |                                                                                                                                                                                                                                                      |    |    |                                              |
|----|------------------------------------------------------------------------------------------------------------------------------------------------------------------------------------------------------------------------------------------------------|----|----|----------------------------------------------|
|    | <p><i>Sulfacetamide</i></p> <p><i>Famotidine</i></p> <p><i>Acetohexamide</i></p> <p><i>Norfloracin</i></p> <p><i>Hycanthone</i></p>                                                                                                                  |    |    |                                              |
| 14 | <p>Fenoterol</p> <p>Thalidomide</p> <p>Clomethiazole</p> <p>Diazoxide</p> <p><i>Melatonin</i></p> <p><i>Metyrapone</i></p> <p><i>Levofloxacin</i></p> <p><i>Hydroxyzine</i></p> <p><i>Molindone</i></p> <p><i>Oxybutynin</i></p>                     | 42 | 63 | <p>5 KEGG</p> <p>16 GO BP</p> <p>2 GO CC</p> |
| 15 | <p>Triflupromazine</p> <p>Rimexolone</p> <p>Procainamide</p> <p>Bisacodyl</p> <p>Trifluoperazine</p> <p><i>Propylthiouracil</i></p> <p><i>Sulfachloropyridazine</i></p> <p><i>Atrazine</i></p> <p><i>Ciprofloxacin</i></p> <p><i>Nomifensine</i></p> | 75 | 71 | <p>0 KEGG</p> <p>0 GO BP</p> <p>3 GO CC</p>  |

|    |                                                                                                                                                                                              |     |     |                               |
|----|----------------------------------------------------------------------------------------------------------------------------------------------------------------------------------------------|-----|-----|-------------------------------|
| 16 | Dydrogesterone<br>Levonorgestrel<br>Ondansetron<br>Tolbutamide<br>Olmesartan medoxomil<br>Nafcillin<br>Lamotrigine<br>Amiodarone<br><br><i>Moricizine</i><br><i>Modafinil</i>                | 124 | 125 | 6 KEGG<br>14 GO BP<br>0 GO CC |
| 17 | Salmeterol<br>Timolol<br>Flecainide<br>Fenoldopam<br>Disopyramide<br><br><i>Thiamphenicol</i><br><i>Tolfenamic acid</i><br><i>Enoxacin</i><br><i>Sulfadimethoxine</i><br><i>Piperacillin</i> | 90  | 93  | 2 KEGG<br>5 GO BP<br>13 GO CC |
| 18 | Clozapine<br>Nialamide<br>Pyrimethamine<br>Pantoprazole<br><br><i>Tocainide</i>                                                                                                              | 100 | 88  | /                             |

|    |                                                                                                                                                                                        |    |    |                              |
|----|----------------------------------------------------------------------------------------------------------------------------------------------------------------------------------------|----|----|------------------------------|
|    | <i>Indapamide</i><br><i>Deferoxamine</i><br><i>Diazepam</i><br><i>Gliclazide</i><br><i>Colchicine</i>                                                                                  |    |    |                              |
| 19 | Dexamethasone<br>Carvedilol<br>Flutamide<br>Pravastatin<br><i>Niridazole</i><br><i>Hydrocortisone acetate</i><br><i>Prednisone</i><br><i>Moxisylyte</i><br><i>4-Phenylbutyric acid</i> | 52 | 42 | 0 KEGG<br>0 GO BP<br>2 GO CC |
| 20 | Triamterene<br>Bupropion<br>Nimesulide<br>Sulfisoxazole<br>Testosterone propionate<br>Fenbufen<br><br><i>Aminopyrine</i><br><i>Cyclothiazide</i><br><i>Megestrol acetate</i>           | 70 | 67 | 0 KEGG<br>2 GO BP<br>1 GO CC |
| 21 | Triamcinolone<br>Pirfenidone<br>Fluticasone propionate<br>Bezafibrate                                                                                                                  | 36 | 37 | 0 KEGG<br>3 GO BP<br>0 GO CC |

|    |                                                                                                                                                                                                                                              |     |     |                                               |
|----|----------------------------------------------------------------------------------------------------------------------------------------------------------------------------------------------------------------------------------------------|-----|-----|-----------------------------------------------|
|    | <p><i>Theophylline</i></p> <p><i>Quinethazone</i></p> <p><i>Sulfamethoxypyridazine</i></p> <p><i>Methazolamide</i></p> <p><i>Meticrane</i></p> <p><i>Clotrimazole</i></p>                                                                    |     |     |                                               |
| 22 | <p>Ciprofibrate</p> <p>Primaquine</p> <p>Benzbromarone</p> <p>Progesterone</p> <p><i>Dichlorophen</i></p> <p><i>Lansoprazole</i></p> <p><i>Tolazoline</i></p> <p><i>Bergapten</i></p> <p><i>Methoxsalen</i></p> <p><i>Sulfamethizole</i></p> | 36  | 44  | <p>1 KEGG</p> <p>1 GO BP</p> <p>2 GO CC</p>   |
| 23 | <p>Alrestatin</p> <p>Pimozide</p> <p>Cimetidine</p> <p>Flufenamic acid</p> <p>Valsartan</p> <p>Nilutamide</p> <p><i>Bromocriptine</i></p> <p><i>Cefoperazone</i></p> <p><i>Benazepril</i></p> <p><i>Tiaprofenic acid</i></p>                 | 123 | 128 | <p>15 KEGG</p> <p>24 GO BP</p> <p>9 GO CC</p> |



|    |                                                                                                                                                                                                                                                                                     |     |     |                                               |
|----|-------------------------------------------------------------------------------------------------------------------------------------------------------------------------------------------------------------------------------------------------------------------------------------|-----|-----|-----------------------------------------------|
| 24 | <p>Beclomethasone dipropionate</p> <p>Thiotepa</p> <p>Loperamide</p> <p>Digoxin</p> <p>Ornidazole</p> <p>Paroxetine</p> <p><i>Pefloxacin</i></p> <p><i>Ticlopidine</i></p> <p><i>Althiazide</i></p> <p><i>Ethacrynic acid</i></p>                                                   | 120 | 128 | <p>13 KEGG</p> <p>20 GO BP</p> <p>0 GO CC</p> |
| 25 | <p>Rofecoxib</p> <p>8-methyl-8-azabicyclo[3.2.1]oct-3-yl 1H-indole-3-carboxylate</p> <p>Phentolamine</p> <p>Tolazamide</p> <p>Celecoxib</p> <p><i>Indomethacin</i></p> <p><i>Diphenhydramine</i></p> <p><i>Pilocarpine</i></p> <p><i>Levamisole</i></p> <p><i>Methapyrilene</i></p> | 84  | 76  | <p>16 KEGG</p> <p>29 GO BP</p> <p>2 GO CC</p> |
| 26 | <p>Practolol</p> <p>Amiloride</p> <p>Diphenidol</p> <p>Metolazone</p> <p>Chloroquine</p> <p>Trazodone</p>                                                                                                                                                                           | 119 | 122 | <p>2 KEGG</p> <p>21 GO BP</p> <p>6 GO CC</p>  |

|    |                                                                                                                                                                                             |     |     |                                 |
|----|---------------------------------------------------------------------------------------------------------------------------------------------------------------------------------------------|-----|-----|---------------------------------|
|    | <i>Phenacemide</i><br><i>Suprofen</i><br><i>Niclosamide</i><br><i>Propranolol</i>                                                                                                           |     |     |                                 |
| 27 | Dibenzepin<br>Meclofenamic acid<br>Nortriptyline<br>Fluspirilene<br>Diflunisal<br><br><i>Sotalol</i><br><i>Acebutolol</i><br><i>Aceclofenac</i><br><i>Diltiazem</i><br><i>Acetaminophen</i> | 278 | 414 | 10 KEGG<br>12 GO BP<br>7 GO CC  |
| 28 | Prazosin<br>Mirtazapine<br>Ketorolac<br>Iopanoic acid<br>Tolmetin<br>Omacetaxine mepesuccinate<br>Ciglitazone<br><br><i>Selegiline</i><br><i>Disulfiram</i>                                 | 319 | 584 | 22 KEGG<br>53 GO BP<br>19 GO CC |
| 29 | Riluzole<br>Famnidamol<br>Clemastine                                                                                                                                                        | 90  | 75  | 1 KEGG<br>5 GO BP<br>5 GO CC    |

|    |                                                                                                                                                                                                                           |    |    |                                             |
|----|---------------------------------------------------------------------------------------------------------------------------------------------------------------------------------------------------------------------------|----|----|---------------------------------------------|
|    | <p>Cyclopenthiazide</p> <p><i>Cephalothin</i></p> <p><i>Captopril</i></p> <p><i>Repaglinide</i></p> <p><i>Metronidazole</i></p> <p><i>Letrozole</i></p> <p><i>Penicillin g</i></p>                                        |    |    |                                             |
| 30 | <p>Diclofenac</p> <p>Pseudoephedrine</p> <p>Brinzolamide</p> <p>Metaxalone</p> <p>Glipizide</p> <p><i>Tranilast</i></p> <p><i>Cefuroxime</i></p> <p><i>Phenytoin</i></p> <p><i>Ritodrine</i></p> <p><i>Miconazole</i></p> | 57 | 59 | <p>1 KEGG</p> <p>7 GO BP</p> <p>4 GO CC</p> |

|    |                                                                                                                                                                                                       |     |     |                                         |
|----|-------------------------------------------------------------------------------------------------------------------------------------------------------------------------------------------------------|-----|-----|-----------------------------------------|
| 31 | <p>Fenofibrate<br/>Praziquantel<br/>Terfenadine<br/>Metoprolol<br/>Omeprazole<br/>Loxapine</p> <p><i>Adenosine</i><br/><i>Estrone</i><br/><i>Sulfathiazole</i></p>                                    | 125 | 104 | <p>7 KEGG<br/>31 GO BP<br/>6 GO CC</p>  |
| 32 | <p>Milrinone<br/>Lovastatin<br/>Cilostazol<br/>3-Methylcholanthrene<br/>Phenylbutazone<br/>Flunarizine<br/>Norethindrone</p> <p><i>Azlocillin</i><br/><i>Doxazosin</i><br/><i>Estrone sulfate</i></p> | 497 | 658 | <p>2 KEGG<br/>19 GO BP<br/>12 GO CC</p> |
| 33 | <p>Cabergoline<br/>Alfuzosin<br/>Perphenazine<br/>Bepiridil<br/>Tinidazole</p> <p><i>Cinchophen</i></p>                                                                                               | 84  | 120 | <p>0 KEGG<br/>4 GO BP<br/>0 GO CC</p>   |

|    |                                                                                                                                                                                           |     |    |                               |
|----|-------------------------------------------------------------------------------------------------------------------------------------------------------------------------------------------|-----|----|-------------------------------|
|    | <i>Cyclizine</i><br><i>Chlorpropamide</i><br><i>Trichlormethiazide</i><br><i>Mephénytoin</i>                                                                                              |     |    |                               |
| 34 | Altretamine<br>Etodolac<br>Raloxifene<br>Domperidone<br>Chlorpromazine<br><i>Chlorotrianisene</i><br><i>Hydralazine</i><br><i>Flurbiprofen</i><br><i>Azactam</i><br><i>Nitrofurantoin</i> | 101 | 99 | 0 KEGG<br>4 GO BP<br>3 GO CC  |
| 35 | Ramacemide<br>Mefenamic acid<br>Carbamazepine<br>Ketoprofen<br>Dipyridamole<br>Prochlorperazine<br>Dantrolene<br><br><i>Carbimazole</i><br><i>Astemizole</i><br><i>Bambuterol</i>         | 76  | 75 | 0 KEGG<br>21 GO BP<br>0 GO CC |
| 36 | Moxonidine<br>Pinacidil                                                                                                                                                                   | 114 | 94 | 0 KEGG<br>6 GO BP             |

|                     |                                                                                                                                                                                                                            |                                    |                                      |                                |
|---------------------|----------------------------------------------------------------------------------------------------------------------------------------------------------------------------------------------------------------------------|------------------------------------|--------------------------------------|--------------------------------|
|                     | Pentoxifylline<br>Oxaprozin<br>Primidone<br>Benzthiazide<br>Naproxen<br><br><i>Tianeptine</i><br><i>Cinoxacin</i>                                                                                                          |                                    |                                      | 0 GO CC                        |
| 37                  | Gatifloxacin<br>Pheniramine<br>Fluoxetine<br><br><i>Azelastine</i><br><i>Iocetamic acid</i><br><i>Liothyronine</i><br><i>Lomefloxacin</i><br><i>Phthalylsulfathiazole</i><br><i>Cyclobenzaprine</i><br><br><i>Atenolol</i> | 46                                 | 30                                   | /                              |
| <b>CP_eTox_H_MF</b> |                                                                                                                                                                                                                            |                                    |                                      |                                |
| <b>Cluster</b>      | <b>Compounds</b>                                                                                                                                                                                                           | <b>Number of upregulated genes</b> | <b>Number of downregulated genes</b> | <b>Enrichment terms</b>        |
| 1                   | Estradiol<br>Primaquine<br>Ticlopidine<br>Digoxin                                                                                                                                                                          | 102                                | 102                                  | 28 KEGG<br>80 GO BP<br>2 GO CC |

|   |                                                                                                                                                                                      |     |     |                                               |
|---|--------------------------------------------------------------------------------------------------------------------------------------------------------------------------------------|-----|-----|-----------------------------------------------|
|   | <p>Fexofenadine</p> <p><i>Chlorotrianisene</i></p> <p><i>Cyclobenzaprine</i></p> <p><i>Famotidine</i></p>                                                                            |     |     |                                               |
| 2 | <p>Dicloxacillin</p> <p>Trioxsalen</p> <p>Pheniramine</p> <p>Dipyridamole</p> <p><i>Sulfaethidole</i></p> <p><i>Azactam</i></p> <p><i>Nomifensine</i></p> <p><i>Cefoperazone</i></p> | 35  | 45  | <p>0 KEGG</p> <p>8 GO BP</p> <p>0 GO CC</p>   |
| 3 | <p>Penicillin g</p> <p>Omeprazole</p> <p>Promazine</p> <p>Benzthiazide</p> <p>Carvedilol</p> <p><i>Tolfenamic acid</i></p> <p><i>Baclofen</i></p> <p><i>Chlorothiazide</i></p>       | 116 | 107 | <p>1 KEGG</p> <p>4 GO BP</p> <p>0 GO CC</p>   |
| 4 | <p>Bendroflumethiazide</p> <p>Trazodone</p> <p>Praziquantel</p> <p>Simvastatin</p> <p>Diflunisal</p>                                                                                 | 288 | 433 | <p>10 KEGG</p> <p>25 GO BP</p> <p>7 GO CC</p> |

|   |                                                                                                                                                                                          |    |    |                                              |
|---|------------------------------------------------------------------------------------------------------------------------------------------------------------------------------------------|----|----|----------------------------------------------|
|   | <p><i>Sotalol</i></p> <p><i>Pilocarpine</i></p> <p><i>Dichlorophen</i></p>                                                                                                               |    |    |                                              |
| 5 | <p>Pizotifen</p> <p>Caffeine</p> <p>Norethindrone</p> <p>Naftidrofuryl</p> <p>Diclofenac</p> <p><i>Nitrofurantoin</i></p> <p><i>Letrozole</i></p> <p><i>Lomefloxacin</i></p>             | 88 | 94 | <p>3 KEGG</p> <p>8 GO BP</p> <p>7 GO CC</p>  |
| 6 | <p>Lamotrigine</p> <p>Domperidone</p> <p>Celecoxib</p> <p><i>Norfloxacin</i></p> <p><i>Galantamine</i></p> <p><i>Liothyronine</i></p> <p><i>Suprofen</i></p> <p><i>Chlorzoxazone</i></p> | 52 | 44 | <p>3 KEGG</p> <p>17 GO BP</p> <p>1 GO CC</p> |
| 7 | <p>Protriptyline</p> <p>Ketoprofen</p> <p>Clomethiazole</p> <p>Prazosin</p> <p><i>Metronidazole</i></p>                                                                                  | 88 | 81 | <p>0 KEGG</p> <p>0 GO BP</p> <p>0 GO CC</p>  |



|    |                                                                                                                                     |     |     |                                |
|----|-------------------------------------------------------------------------------------------------------------------------------------|-----|-----|--------------------------------|
|    | <i>Deferoxamine</i><br><i>Glafenine</i>                                                                                             |     |     |                                |
| 8  | Glyburide<br>Cimetidine<br>Triamcinolone<br>Mebendazole<br><br><i>Indomethacin</i><br><i>Trichlormethiazide</i><br><i>Tegaserod</i> | 110 | 135 | 3 KEGG<br>8 GO BP<br>3 GO CC   |
| 9  | Amitriptyline<br>Pimozide<br>Cyclopentiazide<br>Perphenazine<br>Tolazamide<br><br><i>AHZ9RYL9EW</i><br><i>Zopiclone</i>             | 95  | 108 | 10 KEGG<br>30 GO BP<br>5 GO CC |
| 10 | Dibenzepin<br>Milrinone<br>Mesoridazine<br>Gatifloxacin<br>Ketotifen<br><br><i>Doxazosin</i><br><i>Gemfibrozil</i>                  | 65  | 81  | 5 KEGG<br>0 GO BP<br>1 GO CC   |
| 11 | Meclofenamic acid                                                                                                                   | 52  | 29  | 0 KEGG                         |

|    |                                                                                                                                                                         |     |     |                                              |
|----|-------------------------------------------------------------------------------------------------------------------------------------------------------------------------|-----|-----|----------------------------------------------|
|    | <p>Oxaprozin</p> <p><i>Sulfathiazole</i></p> <p><i>Ciprofloxacin</i></p> <p><i>Lansoprazole</i></p> <p><i>Prednisolone</i></p> <p><i>Prednisone</i></p>                 |     |     | <p>2 GO BP</p> <p>0 GO CC</p>                |
| 12 | <p>Spirolactone</p> <p>Nortriptyline</p> <p>Dydrogesterone</p> <p>Salmeterol</p> <p><i>Fluvastatine</i></p> <p><i>Chlormezanone</i></p> <p><i>Megestrol acetate</i></p> | 61  | 53  | <p>0 KEGG</p> <p>2 GO BP</p> <p>0 GO CC</p>  |
| 13 | <p>Pravastatin</p> <p>Methysergide</p> <p>Triflupromazine</p> <p>Betahistine</p> <p>Daunorubicin</p> <p><i>Sulfamethizole</i></p> <p><i>Carbimazole</i></p>             | 415 | 387 | <p>3 KEGG</p> <p>26 GO BP</p> <p>8 GO CC</p> |
| 14 | <p>Estrone</p> <p>Albendazole</p> <p>Candesartan cilexetil</p> <p><i>Acebutolol</i></p>                                                                                 | 36  | 24  | <p>0 KEGG</p> <p>3 GO BP</p> <p>0 GO CC</p>  |

|    |                                                                                                                                                         |    |    |                               |
|----|---------------------------------------------------------------------------------------------------------------------------------------------------------|----|----|-------------------------------|
|    | <i>Sulfamerazine</i><br><i>Sulfadimethoxine</i><br><i>Iocetamic acid</i>                                                                                |    |    |                               |
| 15 | Moxonidine<br>Olmesartan medoxomil<br><br><i>Cinchophen</i><br><i>Quinethazone</i><br><i>Tocainide</i><br><i>Propranolol</i><br><i>Diphenylpyraline</i> | 29 | 31 | 3 KEGG<br>0 GO BP<br>0 GO CC  |
| 16 | Terfenadine<br>Propofol<br>Cyproheptadine<br>Doxepin<br>Flunarizine<br><br><i>Cefuroxime</i><br><i>Captopril</i>                                        | 73 | 76 | 0 KEGG<br>14 GO BP<br>1 GO CC |
| 17 | Fenofibrate<br>Metolazone<br>Flecainide<br>Carteolol<br>Sildenafil<br>Quinapril<br><br><i>Enoxacin</i>                                                  | 69 | 74 | 0 KEGG<br>1 GO BP<br>0 GO CC  |

|    |                                                                                                                                                                              |    |    |                                             |
|----|------------------------------------------------------------------------------------------------------------------------------------------------------------------------------|----|----|---------------------------------------------|
| 18 | <p>Imatinib</p> <p>Risperidone</p> <p>Doxylamine</p> <p><i>Levofloxacin</i></p> <p><i>Furosemide</i></p> <p><i>Clidinium</i></p> <p><i>Metyrapone</i></p>                    | 51 | 54 | <p>3 KEGG</p> <p>8 GO BP</p> <p>0 GO CC</p> |
| 19 | <p>Pantoprazole</p> <p>Fluticasone propionate</p> <p>Pseudoephedrine</p> <p><i>Cefoxitin</i></p> <p><i>Oxybutynin</i></p> <p><i>Zonisamide</i></p> <p><i>Hydroxyzine</i></p> | 20 | 31 | /                                           |
| 20 | <p>Nilutamide</p> <p>Mexiletine</p> <p>Thiabendazole</p> <p>Metoprolol</p> <p><i>Molindone</i></p> <p><i>Selegiline</i></p> <p><i>Diazepam</i></p>                           | 42 | 39 | <p>1 KEGG</p> <p>2 GO BP</p> <p>0 GO CC</p> |
| 21 | <p>Timolol</p> <p>Progesterone</p> <p>Rofecoxib</p>                                                                                                                          | 35 | 26 | <p>2 KEGG</p> <p>1 GO BP</p> <p>0 GO CC</p> |

|    |                                                                                                                                             |    |    |                              |
|----|---------------------------------------------------------------------------------------------------------------------------------------------|----|----|------------------------------|
|    | <i>Colchicine</i><br><i>Theophylline</i><br><i>Ketoconazole</i><br><i>Gliclazide</i>                                                        |    |    |                              |
| 22 | Amantadine<br>Loperamide<br>Verapamil<br>Brinzolamide<br>Diltiazem<br>Metoclopramide<br><br><i>Acetaminophen</i>                            | 77 | 83 | 0 KEGG<br>2 GO BP<br>3 GO CC |
| 23 | Perindopril<br>Nefazodone<br>Diazoxide<br><br><i>Bromocriptine</i><br><i>Phenytoin</i><br><i>Zolpidem</i><br><i>Methapyrilene</i>           | 25 | 28 | 0 KEGG<br>0 GO BP<br>1 GO CC |
| 24 | Bupropion<br>Clomipramine<br>Loxapine<br><br><i>Diphenhydramine</i><br><i>Althiazide</i><br><i>Repaglinide</i><br><i>Hydroflumethiazide</i> | 80 | 44 | 0 KEGG<br>3 GO BP<br>0 GO CC |

|    |                                                                                                                                    |     |     |                              |
|----|------------------------------------------------------------------------------------------------------------------------------------|-----|-----|------------------------------|
| 25 | Trifluoperazine<br>Trimethobenzamide<br>Ornidazole<br>Alfuzosin<br><i>Aminopyrine</i><br><i>Phenacemide</i><br><i>Clotrimazole</i> | 43  | 43  | 0 KEGG<br>0 GO BP<br>3 GO CC |
| 26 | Phentolamine<br>Propafenone<br>Paroxetine<br>Pentoxifylline<br>Bepridil<br>Primidone<br><i>Etoposide</i>                           | 96  | 116 | 0 KEGG<br>1 GO BP<br>0 GO CC |
| 27 | Mibefradil<br>Proguanil<br>Tamoxifen<br>Lidocaine<br><i>Cyclothiazide</i><br><i>Azathioprine</i><br><i>Levamisole</i>              | 41  | 45  | 1 KEGG<br>7 GO BP<br>0 GO CC |
| 28 | Clozapine<br>Chlorthalidone<br>Chlorpromazine<br>Lovastatin                                                                        | 108 | 92  | 4 KEGG<br>3 GO BP<br>3 GO CC |

|    |                                                                                                                                                                          |     |     |                                                |
|----|--------------------------------------------------------------------------------------------------------------------------------------------------------------------------|-----|-----|------------------------------------------------|
|    | <p>Fluoxetine</p> <p><i>Ritodrine</i></p> <p><i>Bergapten</i></p>                                                                                                        |     |     |                                                |
| 29 | <p>Probenecid</p> <p>Buspirone</p> <p>Mefenamic acid</p> <p>Papaverine</p> <p>Benzbromarone</p> <p><i>Hycanthone</i></p> <p><i>Phthalylsulfathiazole</i></p>             | 63  | 57  | <p>1 KEGG</p> <p>6 GO BP</p> <p>0 GO CC</p>    |
| 30 | <p>Thalidomide</p> <p>Bisacodyl</p> <p>Famciclovir</p> <p>Tolmetin</p> <p>Disopyramide</p> <p><i>Valacyclovir</i></p> <p><i>Methoxsalen</i></p>                          | 112 | 110 | <p>11 KEGG</p> <p>22 GO BP</p> <p>15 GO CC</p> |
| 31 | <p>Flutamide</p> <p>Finasteride</p> <p>Rimexolone</p> <p>Practolol</p> <p><i>Meticrane</i></p> <p><i>Sulfamethoxyipyridazine</i></p> <p><i>Sulfachloropyridazine</i></p> | 41  | 50  | <p>0 KEGG</p> <p>0 GO BP</p> <p>0 GO CC</p>    |

|    |                                                                                                                                  |    |     |                               |
|----|----------------------------------------------------------------------------------------------------------------------------------|----|-----|-------------------------------|
| 32 | Pyrimethamine<br>Phenylbutazone<br>Mepivacaine<br>Cabergoline<br><br><i>Atenolol</i><br><i>Benazepril</i><br><i>Piperacillin</i> | 27 | 45  | 0 KEGG<br>0 GO BP<br>1 GO CC  |
| 33 | Amiodarone<br>Dantrolene<br>Riluzole<br>Trimipramine<br>Prochlorperazine<br>Levonorgestrel<br><br><i>Aceclofenac</i>             | 68 | 102 | 3 KEGG<br>14 GO BP<br>0 GO CC |
| 34 | Metaxalone<br>Diphenidol<br>Ketorolac<br><br><i>Flurbiprofen</i><br><i>Hydralazine</i><br><i>Cefazolin</i><br><i>Zomepirac</i>   | 40 | 31  | 0 KEGG<br>1 GO BP<br>0 GO CC  |
| 35 | Clemastine<br>Saquinavir<br>Triamterene<br>Nimesulide                                                                            | 46 | 48  | 0 KEGG<br>1 GO BP<br>0 GO CC  |



|    |                                                                                                                                                                        |    |    |                                             |
|----|------------------------------------------------------------------------------------------------------------------------------------------------------------------------|----|----|---------------------------------------------|
|    | <p>Methocarbamol</p> <p>Fluconazole</p> <p><i>Cloxacillin</i></p>                                                                                                      |    |    |                                             |
| 36 | <p>Bumetanide</p> <p>Dexamethasone</p> <p>Naproxen</p> <p>Thiotepa</p> <p><i>Imipramine</i></p> <p><i>Valdecoxib</i></p> <p><i>Azlocillin</i></p>                      | 75 | 60 | <p>0 KEGG</p> <p>2 GO BP</p> <p>0 GO CC</p> |
| 37 | <p>Etodolac</p> <p>Danthron</p> <p><i>Pentobarbital</i></p> <p><i>Hydrochlorothiazide</i></p> <p><i>Torsemide</i></p> <p><i>Melatonin</i></p> <p><i>Indapamide</i></p> | 49 | 40 | <p>0 KEGG</p> <p>0 GO BP</p> <p>0 GO CC</p> |
| 38 | <p>Fenoterol</p> <p>Atomoxetine</p> <p>Amoxapine</p> <p><i>Astemizole</i></p> <p><i>Tolazoline</i></p> <p><i>Sulfadiazine</i></p> <p><i>Ethionamide</i></p>            | 56 | 47 | <p>1 KEGG</p> <p>1 GO BP</p> <p>0 GO CC</p> |

|    |                                                                                                                                                                                  |    |    |                                             |
|----|----------------------------------------------------------------------------------------------------------------------------------------------------------------------------------|----|----|---------------------------------------------|
| 39 | <p>Testosterone propionate</p> <p>Mirtazapine</p> <p>Venlafaxine</p> <p><i>Dapsone</i></p> <p><i>Cyclizine</i></p> <p><i>Azelastine</i></p> <p><i>Sulfacetamide</i></p>          | 37 | 35 | <p>0 KEGG</p> <p>0 GO BP</p> <p>1 GO CC</p> |
| 40 | <p>Amiloride</p> <p>Haloperidol</p> <p>Carbamazepine</p> <p><i>Hydrocortisone acetate</i></p> <p><i>Moricizine</i></p> <p><i>Loratadine</i></p> <p><i>Methazolamide</i></p>      | 44 | 50 | <p>0 KEGG</p> <p>3 GO BP</p> <p>1 GO CC</p> |
| 41 | <p>Sulfisoxazole</p> <p>Tinidazole</p> <p>Ondansetron</p> <p>Beclomethasone dipropionate</p> <p><i>Niridazole</i></p> <p><i>Ethacrynic acid</i></p> <p><i>Chlorpropamide</i></p> | 49 | 48 | <p>2 KEGG</p> <p>1 GO BP</p> <p>0 GO CC</p> |
| 42 | <p>Glipizide</p> <p>Procainamide</p> <p>Mometasone furoate</p>                                                                                                                   | 33 | 26 | <p>0 KEGG</p> <p>3 GO BP</p> <p>0 GO CC</p> |

|    |                                                                                                                                                                                  |    |    |                                             |
|----|----------------------------------------------------------------------------------------------------------------------------------------------------------------------------------|----|----|---------------------------------------------|
|    | <p><i>Mephenytoin</i></p> <p><i>Acetazolamide</i></p> <p><i>Nabumetone</i></p> <p><i>Xylometazoline</i></p>                                                                      |    |    |                                             |
| 43 | <p>Raloxifene</p> <p>Modafinil</p> <p>Niridazole</p> <p>Enalapril</p> <p><i>Estrone sulfate</i></p> <p><i>Moxisylyte</i></p> <p><i>Propylthiouracil</i></p>                      | 41 | 46 | <p>0 KEGG</p> <p>0 GO BP</p> <p>0 GO CC</p> |
| 44 | <p>Nafcillin</p> <p>Dexamethasone acetate</p> <p>Leflunomide</p> <p>Cilostazol</p> <p>Chloroquine</p> <p><i>Acetohexamide</i></p> <p><i>Terbutaline</i></p>                      | 84 | 97 | <p>1 KEGG</p> <p>0 GO BP</p> <p>0 GO CC</p> |
| 45 | <p>Alrestatin</p> <p>Valsartan</p> <p><i>Trimethoprim</i></p> <p><i>Sulfamethoxazole</i></p> <p><i>4-Phenylbutyric acid</i></p> <p><i>Disulfiram</i></p> <p><i>Adenosine</i></p> | 34 | 29 | <p>1 KEGG</p> <p>5 GO BP</p> <p>0 GO CC</p> |

| CP_eTox_H_MFHB |                                                                                                                                                        |                             |                               |                              |
|----------------|--------------------------------------------------------------------------------------------------------------------------------------------------------|-----------------------------|-------------------------------|------------------------------|
| Cluster        | Compounds                                                                                                                                              | Number of upregulated genes | Number of downregulated genes | Enrichment terms             |
| 1              | Paroxetine<br>Verapamil<br>Practolol<br>Benzthiazide<br><br><i>Acetaminophen</i><br><i>Letrozole</i><br><i>Quinethazone</i><br><i>Propylthiouracil</i> | 76                          | 71                            | 0 KEGG<br>1 GO BP<br>0 GO CC |
| 2              | Metolazone<br>Finasteride<br>Estrone<br>Chlorthalidone<br>Phenylbutazone<br>Cyclopenthiiazide<br><br><i>Trichlormethiazide</i><br><i>Cefazolin</i>     | 46                          | 64                            | 0 KEGG<br>0 GO BP<br>1 GO CC |
| 3              | Doxepin<br>Raloxifene<br>Amiodarone<br><br><i>Cyclizine</i>                                                                                            | 45                          | 67                            | 1 KEGG<br>7 GO BP<br>0 GO CC |

|   |                                                                                                                                      |     |     |                                |
|---|--------------------------------------------------------------------------------------------------------------------------------------|-----|-----|--------------------------------|
|   | <i>Trimethoprim</i><br><i>Deferoxamine</i><br><i>Indomethacin</i>                                                                    |     |     |                                |
| 4 | Nilutamide<br>Carbamazepine<br>Venlafaxine<br><i>Piperacillin</i><br><i>Glafenine</i><br><i>Estrone sulfate</i><br><i>Althiazide</i> | 44  | 36  | 1 KEGG<br>2 GO BP<br>0 GO CC   |
| 5 | Metoclopramide<br>Primidone<br>Fluoxetine<br><i>Metronidazole</i><br><i>Zonisamide</i><br><i>Phenytoin</i><br><i>Flurbiprofen</i>    | 55  | 38  | 0 KEGG<br>0 GO BP<br>3 GO CC   |
| 6 | Moxonidine<br>Diflunisal<br>Alfuzosin<br>Dicloxacillin<br><i>Repaglinide</i><br><i>Azelastine</i><br><i>Benazepril</i>               | 248 | 399 | 10 KEGG<br>11 GO BP<br>6 GO CC |
| 7 | Perindopril                                                                                                                          | 23  | 33  | /                              |

|    |                                                                                                                                             |    |    |                                        |
|----|---------------------------------------------------------------------------------------------------------------------------------------------|----|----|----------------------------------------|
|    | <p>Saquinavir<br/>Methocarbamol</p> <p><i>Azlocillin</i><br/><i>Enoxacin</i><br/><i>Zolpidem</i><br/><i>Pilocarpine</i></p>                 |    |    |                                        |
| 8  | <p>Gatifloxacin<br/>Chloroquine<br/>Flecainide<br/>Tolazamide</p> <p><i>Acetohexamide</i><br/><i>Cyclobenzaprine</i><br/><i>Sotalol</i></p> | 70 | 75 | <p>7 KEGG<br/>5 GO BP<br/>1 GO CC</p>  |
| 9  | <p>Tinidazole<br/>Quinapril<br/>Progesterone<br/>Ketotifen</p> <p><i>Cyclothiazide</i><br/><i>Chlormezanone</i><br/><i>Cefoperazone</i></p> | 58 | 67 | <p>5 KEGG<br/>4 GO BP<br/>6 GO CC</p>  |
| 10 | <p>Risperidone<br/>Pyrimethamine<br/>Disopyramide</p> <p><i>Valacyclovir</i></p>                                                            | 50 | 65 | <p>2 KEGG<br/>1 GO BP<br/>10 GO CC</p> |

|    |                                                                                                                                                    |     |    |                              |
|----|----------------------------------------------------------------------------------------------------------------------------------------------------|-----|----|------------------------------|
|    | <i>Diazepam</i><br><i>Azathioprine</i><br><i>Cefoxitin</i>                                                                                         |     |    |                              |
| 11 | Mexiletine<br>Metoprolol<br>Protriptyline<br>Haloperidol<br>Pravastatin<br><br><i>Methapyrilene</i><br><i>Diphenhydramine</i>                      | 102 | 93 | 0 KEGG<br>4 GO BP<br>0 GO CC |
| 12 | Candesartan cilexetil<br>Mirtazapine<br>Famciclovir<br>Ticlopidine<br><br><i>Hydrochlorothiazide</i><br><i>Ciprofloxacin</i><br><i>Hydroxyzine</i> | 61  | 51 | 5 KEGG<br>0 GO BP<br>0 GO CC |
| 13 | Ornidazole<br>Mebendazole<br>Valsartan<br>Flunarizine<br>Simvastatin<br><br><i>Meticrane</i><br><i>Etoposide</i>                                   | 100 | 85 | 2 KEGG<br>3 GO BP<br>2 GO CC |

|    |                                                                                                                                                 |     |    |                                         |
|----|-------------------------------------------------------------------------------------------------------------------------------------------------|-----|----|-----------------------------------------|
| 14 | <p>Loperamide<br/> Proguanil<br/> Carvedilol<br/> Fenofibrate<br/> Diltiazem</p> <p><i>Tegaserod</i><br/> <i>Hydrocortisone acetate</i></p>     | 55  | 52 | <p>0 KEGG<br/> 1 GO BP<br/> 0 GO CC</p> |
| 15 | <p>Thalidomide<br/> Cilostazol<br/> Lamotrigine<br/> Thiabendazole<br/> Atomoxetine<br/> Nefazodone</p> <p><i>Torsemide</i></p>                 | 106 | 96 | <p>0 KEGG<br/> 9 GO BP<br/> 5 GO CC</p> |
| 16 | <p>Spirolactone<br/> Dexamethasone<br/> Dibenzepin<br/> Clomipramine<br/> Propafenone</p> <p><i>Sulfadimethoxine</i><br/> <i>Gliclazide</i></p> | 50  | 64 | /                                       |
| 17 | <p>Fexofenadine<br/> Trimipramine<br/> Etodolac<br/> Fluvastatine</p>                                                                           | 74  | 58 | <p>0 KEGG<br/> 1 GO BP<br/> 4 GO CC</p> |



|    |                                                                                                                                                                           |     |     |                                              |
|----|---------------------------------------------------------------------------------------------------------------------------------------------------------------------------|-----|-----|----------------------------------------------|
|    | <p><i>Propranolol</i></p> <p><i>Famotidine</i></p> <p><i>Pheniramine</i></p>                                                                                              |     |     |                                              |
| 18 | <p>Imatinib</p> <p>Cimetidine</p> <p>Olmesartan medoxomil</p> <p>Modafinil</p> <p><i>Chlorotrianisene</i></p> <p><i>Sulfamethoxazole</i></p> <p><i>Nitrofurantoin</i></p> | 73  | 67  | <p>2 KEGG</p> <p>8 GO BP</p> <p>0 GO CC</p>  |
| 19 | <p>Tamoxifen</p> <p>Pizotifen</p> <p>Lidocaine</p> <p>Dipyridamole</p> <p><i>Norfloxacin</i></p> <p><i>Atenolol</i></p> <p><i>Imipramine</i></p>                          | 64  | 75  | <p>1 KEGG</p> <p>13 GO BP</p> <p>1 GO CC</p> |
| 20 | <p>Flutamide</p> <p>Prochlorperazine</p> <p>Glyburide</p> <p>Enalapril</p> <p>Pentoxifylline</p> <p>Bendroflumethiazide</p> <p><i>Nabumetone</i></p>                      | 100 | 121 | <p>1 KEGG</p> <p>4 GO BP</p> <p>5 GO CC</p>  |

|    |                                                                                                                                                  |     |     |                                |
|----|--------------------------------------------------------------------------------------------------------------------------------------------------|-----|-----|--------------------------------|
| 21 | Riluzole<br>Celecoxib<br>Mometasone furoate<br>Pantoprazole<br>Penicillin g<br><br><i>Prednisone</i><br><i>Clotrimazole</i>                      | 83  | 75  | 3 KEGG<br>14 GO BP<br>3 GO CC  |
| 22 | Daunorubicin<br>Procainamide<br>Digoxin<br><br><i>Cefuroxime</i><br><i>Diphenylpyraline</i><br><i>Hydroflumethiazide</i><br><i>Chlorzoxazone</i> | 401 | 405 | 6 KEGG<br>35 GO BP<br>10 GO CC |
| 23 | Amantadine<br>Diclofenac<br>Bumetanide<br><br><i>Indapamide</i><br><i>Astemizole</i><br><i>Loratadine</i><br><i>Carbimazole</i>                  | 66  | 64  | 0 KEGG<br>6 GO BP<br>0 GO CC   |
| 24 | Ketoprofen<br>Triflupromazine<br>Dantrolene<br>Chlorpromazine                                                                                    | 73  | 70  | 0 KEGG<br>4 GO BP<br>1 GO CC   |

|    |                                                                                                                                                                 |    |     |                                               |
|----|-----------------------------------------------------------------------------------------------------------------------------------------------------------------|----|-----|-----------------------------------------------|
|    | <p><i>Doxazosin</i></p> <p><i>Levofloxacin</i></p> <p><i>Clidinium</i></p>                                                                                      |    |     |                                               |
| 25 | <p>Ondansetron</p> <p>Clomethiazole</p> <p>Pimozide</p> <p>Leflunomide</p> <p>Omeprazole</p> <p><i>Furosemide</i></p> <p><i>Ketoconazole</i></p>                | 94 | 101 | <p>10 KEGG</p> <p>13 GO BP</p> <p>2 GO CC</p> |
| 26 | <p>Milrinone</p> <p>Levonorgestrel</p> <p>Trifluoperazine</p> <p>Clemastine</p> <p><i>Gemfibrozil</i></p> <p><i>Acetazolamide</i></p> <p><i>Galantamine</i></p> | 33 | 55  | /                                             |
| 27 | <p>Ketorolac</p> <p>Estradiol</p> <p>Fluconazole</p> <p>Glipizide</p> <p><i>Prednisolone</i></p> <p><i>Lansoprazole</i></p> <p><i>Chlorpropamide</i></p>        | 59 | 42  | <p>2 KEGG</p> <p>3 GO BP</p> <p>0 GO CC</p>   |

|                       |                                                                                                                               |                              |                                |                                |
|-----------------------|-------------------------------------------------------------------------------------------------------------------------------|------------------------------|--------------------------------|--------------------------------|
| 28                    | Amoxapine<br>Lovastatin<br>Rofecoxib<br>Terfenadine<br>Amitriptyline<br><br><i>Lomefloxacin</i><br><i>Disulfiram</i>          | 98                           | 87                             | 20 KEGG<br>16 GO BP<br>1 GO CC |
| 29                    | Meclofenamic acid<br>Cyproheptadine<br>Doxylamine<br>Clozapine<br>Nimesulide<br><br><i>Captopril</i><br><i>Ritodrine</i>      | 64                           | 47                             | /                              |
| 30                    | Trazodone<br>Albendazole<br>Propofol<br>Nortriptyline<br><br><i>AHZ9RYL9EW</i><br><i>Cloxacillin</i><br><i>Chlorothiazide</i> | 47                           | 40                             | 2 KEGG<br>12 GO BP<br>0 GO CC  |
| <b>CP_eTox_H_MFHC</b> |                                                                                                                               |                              |                                |                                |
| <b>Cluster</b>        | <b>Compounds</b>                                                                                                              | <b>Number of upregulated</b> | <b>Number of downregulated</b> | <b>Enrichment terms</b>        |

|   |                                                                                                                                                                          | genes | genes |                              |
|---|--------------------------------------------------------------------------------------------------------------------------------------------------------------------------|-------|-------|------------------------------|
| 1 | Perphenazine<br>Fluoxetine<br>Bupropion<br>Dibenzepin<br><br><i>Selegiline</i><br><i>Methoxsalen</i><br><i>Azathioprine</i><br><i>Dapsone</i><br><i>Cyclizine</i>        | 82    | 68    | 2 KEGG<br>1 GO BP<br>2 GO CC |
| 2 | Pyrimethamine<br>Modafinil<br>Sulfisoxazole<br>Propafenone<br><br><i>Cinchophen</i><br><i>Cloxacillin</i><br><i>Zopiclone</i><br><i>Zolpidem</i><br><i>Methapyrilene</i> | 37    | 49    | /                            |
| 3 | Clemastine<br>Carbamazepine<br>Primidone<br>Omeprazole<br><br><i>Pentobarbital</i><br><i>Norfloxacin</i>                                                                 | 66    | 67    | 0 KEGG<br>1 GO BP<br>0 GO CC |

|   |                                                                                                                                                                        |     |     |                               |
|---|------------------------------------------------------------------------------------------------------------------------------------------------------------------------|-----|-----|-------------------------------|
|   | <i>Acebutolol</i><br><i>Pilocarpine</i><br><i>Sotalol</i>                                                                                                              |     |     |                               |
| 4 | Cabergoline<br>Dipyridamole<br>Pantoprazole<br>Flunarizine<br>Albendazole<br>Nilutamide<br>Thiotepa<br><br><i>Phthalylsulfathiazole</i><br><i>Tocainide</i>            | 98  | 95  | 1 KEGG<br>2 GO BP<br>0 GO CC  |
| 5 | Mesoridazine<br>Diflunisal<br>Diclofenac<br>Clomipramine<br>Mibefradil<br>Diltiazem<br><br><i>Sulfacetamide</i><br><i>Hydrocortisone acetate</i><br><i>Nomifensine</i> | 272 | 419 | 7 KEGG<br>26 GO BP<br>7 GO CC |
| 6 | Protriptyline<br>Terfenadine<br>Timolol<br><br><i>Hycanthone</i>                                                                                                       | 99  | 87  | 0 KEGG<br>4 GO BP<br>0 GO CC  |

|   |                                                                                                                                                             |     |     |                              |
|---|-------------------------------------------------------------------------------------------------------------------------------------------------------------|-----|-----|------------------------------|
|   | <i>Carbimazole</i><br><i>Ethionamide</i><br><i>Letrozole</i><br><i>Methazolamide</i><br><i>Prednisolone</i>                                                 |     |     |                              |
| 7 | Caffeine<br>Domperidone<br>Methysergide<br><br><i>Galantamine</i><br><i>Aceclofenac</i><br><i>Moricizine</i><br><i>Ketoconazole</i><br><i>Chlorzoxazone</i> | 53  | 40  | 3 KEGG<br>0 GO BP<br>5 GO CC |
| 8 | Glyburide<br>Phentolamine<br>Danthron<br>Tolmetin<br>Ticlopidine<br><br><i>Hydroxyzine</i><br><i>Acetohexamide</i><br><i>Bergapten</i>                      | 101 | 103 | 3 KEGG<br>8 GO BP<br>0 GO CC |
| 9 | Doxepin<br>Glipizide<br><br><i>Diphenhydramine</i><br><i>Cefoperazone</i>                                                                                   | 15  | 21  | 1 KEGG<br>0 GO BP<br>1 GO CC |

|    |                                                                                                                                                    |     |    |                               |
|----|----------------------------------------------------------------------------------------------------------------------------------------------------|-----|----|-------------------------------|
|    | <i>Acetazolamide</i><br><i>Tegaserod</i><br><i>Sulfathiazole</i><br><i>Phenytoin</i>                                                               |     |    |                               |
| 10 | Norethindrone<br>Prazosin<br>Fenoterol<br>Alfuzosin<br>Disopyramide<br>Riluzole<br><br><i>Lansoprazole</i><br><i>Ritodrine</i>                     | 103 | 96 | 3 KEGG<br>7 GO BP<br>9 GO CC  |
| 11 | Fluconazole<br>Pravastatin<br>Oxaprozin<br>Cyproheptadine<br>Prochlorperazine<br>Rimexolone<br><br><i>Benazepril</i><br><i>Hydrochlorothiazide</i> | 74  | 64 | 0 KEGG<br>6 GO BP<br>0 GO CC  |
| 12 | Cimetidine<br>Procainamide<br>Nortriptyline<br>Amiloride<br>Mefenamic acid<br>Praziquantel                                                         | 108 | 78 | 1 KEGG<br>11 GO BP<br>7 GO CC |



|    |                                                                                                                                                                                                |    |    |                                             |
|----|------------------------------------------------------------------------------------------------------------------------------------------------------------------------------------------------|----|----|---------------------------------------------|
|    | <p><i>Ethacrynic acid</i></p> <p><i>Glafenine</i></p>                                                                                                                                          |    |    |                                             |
| 13 | <p>Probenecid</p> <p>Risperidone</p> <p>Thiabendazole</p> <p><i>Etoposide</i></p> <p><i>Baclofen</i></p> <p><i>Megestrol acetate</i></p> <p><i>Cyclobenzaprine</i></p> <p><i>Cefoxitin</i></p> | 26 | 37 | <p>1 KEGG</p> <p>0 GO BP</p> <p>0 GO CC</p> |
| 14 | <p>Pizotifen</p> <p>Carvedilol</p> <p>Mepivacaine</p> <p>Niridazole</p> <p>Fexofenadine</p> <p><i>Diazepam</i></p> <p><i>Valdecoxib</i></p> <p><i>Sulfamethoxypyridazine</i></p>               | 81 | 86 | <p>1 KEGG</p> <p>4 GO BP</p> <p>4 GO CC</p> |
| 15 | <p>Pentoxifylline</p> <p>Simvastatin</p> <p>Triamcinolone</p> <p>Bendroflumethiazide</p> <p>Naftidrofuryl</p> <p><i>Flurbiprofen</i></p>                                                       | 81 | 83 | <p>2 KEGG</p> <p>6 GO BP</p> <p>2 GO CC</p> |

|    |                                                                                                                                                              |    |    |                              |
|----|--------------------------------------------------------------------------------------------------------------------------------------------------------------|----|----|------------------------------|
|    | <i>Terbutaline</i><br><i>AHZ9RYL9EW</i>                                                                                                                      |    |    |                              |
| 16 | Phenylbutazone<br>Dexamethasone acetate<br>Fenofibrate<br>Mirtazapine<br><i>Fluvastatine</i><br><i>Indapamide</i><br><i>Trimethoprim</i><br><i>Cefazolin</i> | 44 | 58 | 0 KEGG<br>0 GO BP<br>1 GO CC |
| 17 | Metaxalone<br>Diazoxide<br>Perindopril<br>Haloperidol<br><i>Sulfaethidole</i><br><i>Nitrofurantoin</i><br><i>Oxybutynin</i><br><i>Bromocriptine</i>          | 38 | 51 | 1 KEGG<br>5 GO BP<br>1 GO CC |
| 18 | Famciclovir<br><i>Chlorpropamide</i><br><i>Prednisone</i><br><i>Repaglinide</i><br><i>Metronidazole</i><br><i>Sulfamerazine</i><br><i>Tolazoline</i>         | /  | /  | /                            |

|    |                                                                                                                                                        |     |     |                              |
|----|--------------------------------------------------------------------------------------------------------------------------------------------------------|-----|-----|------------------------------|
|    | <i>Torsemide</i>                                                                                                                                       |     |     |                              |
| 19 | Lovastatin<br>Enalapril<br>Dexamethasone<br>Ketorolac<br>Flutamide<br>Ketotifen<br><br><i>Phenacemide</i><br><i>Theophylline</i>                       | 106 | 85  | 9 KEGG<br>4 GO BP<br>2 GO CC |
| 20 | Ketoprofen<br>Benzbromarone<br>Practolol<br>Betahistine<br><br><i>Iocetamic acid</i><br><i>Hydralazine</i><br><i>Levofloxacin</i><br><i>Zonisamide</i> | 46  | 37  | 0 KEGG<br>1 GO BP<br>0 GO CC |
| 21 | Trioxsalen<br>Bepridil<br>Raloxifene<br>Proguanil<br>Lamotrigine<br>Doxylamine<br><br><i>Valacyclovir</i><br><i>4-Phenylbutyric acid</i>               | 93  | 106 | 2 KEGG<br>5 GO BP<br>2 GO CC |

|    |                                                                                                                                                                                                |     |     |                                               |
|----|------------------------------------------------------------------------------------------------------------------------------------------------------------------------------------------------|-----|-----|-----------------------------------------------|
| 22 | <p>Bumetanide</p> <p>Digoxin</p> <p>Papaverine</p> <p>Atomoxetine</p> <p>Alrestatin</p> <p><i>Metyrapone</i></p> <p><i>Liothyronine</i></p> <p><i>Tolfenamic acid</i></p>                      | 100 | 112 | <p>18 KEGG</p> <p>35 GO BP</p> <p>2 GO CC</p> |
| 23 | <p>Fluticasone propionate</p> <p>Rofecoxib</p> <p>Amiodarone</p> <p>Venlafaxine</p> <p>Naproxen</p> <p>Loxapine</p> <p><i>Aminopyrine</i></p> <p><i>Diphenylpyraline</i></p>                   | 94  | 98  | <p>8 KEGG</p> <p>6 GO BP</p> <p>0 GO CC</p>   |
| 24 | <p>Pseudoephedrine</p> <p>Progesterone</p> <p>Estradiol</p> <p>Candesartan cilexetil</p> <p><i>Captopril</i></p> <p><i>Moxisylyte</i></p> <p><i>Disulfiram</i></p> <p><i>Ciprofloxacin</i></p> | 52  | 49  | <p>1 KEGG</p> <p>5 GO BP</p> <p>0 GO CC</p>   |
| 25 | Ondansetron                                                                                                                                                                                    | 45  | 38  | 1 KEGG                                        |

|    |                                                                                                                                                                              |    |    |                                             |
|----|------------------------------------------------------------------------------------------------------------------------------------------------------------------------------|----|----|---------------------------------------------|
|    | <p>Testosterone propionate</p> <p>Leflunomide</p> <p>Nefazodone</p> <p><i>Famotidine</i></p> <p><i>Colchicine</i></p> <p><i>Doxazosin</i></p> <p><i>Mephenytoin</i></p>      |    |    | <p>0 GO BP</p> <p>0 GO CC</p>               |
| 26 | <p>Tinidazole</p> <p>Amitriptyline</p> <p>Milrinone</p> <p>Triflupromazine</p> <p>Cilostazol</p> <p><i>Astemizole</i></p> <p><i>Dichlorophen</i></p> <p><i>Suprofen</i></p>  | 93 | 95 | <p>1 KEGG</p> <p>2 GO BP</p> <p>0 GO CC</p> |
| 27 | <p>Pheniramine</p> <p>Celecoxib</p> <p>Nimesulide</p> <p>Penicillin g</p> <p>Trifluoperazine</p> <p><i>Azlocillin</i></p> <p><i>Deferoxamine</i></p> <p><i>Adenosine</i></p> | 78 | 66 | <p>1 KEGG</p> <p>2 GO BP</p> <p>4 GO CC</p> |
| 28 | <p>Beclomethasone dipropionate</p> <p>Buspiron</p>                                                                                                                           | 54 | 56 | <p>2 KEGG</p> <p>7 GO BP</p>                |

|    |                                                                                                                                                                    |     |     |                                              |
|----|--------------------------------------------------------------------------------------------------------------------------------------------------------------------|-----|-----|----------------------------------------------|
|    | <p>Mometasone furoate</p> <p>Verapamil</p> <p>Lidocaine</p> <p><i>Indomethacin</i></p> <p><i>Sulfadimethoxine</i></p> <p><i>Enoxacin</i></p>                       |     |     | 4 GO CC                                      |
| 29 | <p>Thalidomide</p> <p>Paroxetine</p> <p>Metoprolol</p> <p>Brinzolamide</p> <p>Daunorubicin</p> <p>Finasteride</p> <p>Levonorgestrel</p> <p><i>Sulfadiazine</i></p> | 430 | 415 | <p>2 KEGG</p> <p>32 GO BP</p> <p>9 GO CC</p> |
| 30 | <p>Loperamide</p> <p>Etodolac</p> <p>Dantrolene</p> <p>Chloroquine</p> <p>Nafcillin</p> <p>Bisacodyl</p> <p><i>Trichlormethiazide</i></p> <p><i>Azactam</i></p>    | 100 | 92  | <p>1 KEGG</p> <p>5 GO BP</p> <p>3 GO CC</p>  |
| 31 | <p>Mexiletine</p> <p>Moxonidine</p> <p>Valsartan</p>                                                                                                               | 92  | 88  | <p>3 KEGG</p> <p>28 GO BP</p> <p>1 GO CC</p> |

|    |                                                                                                                                                                                      |    |    |                                             |
|----|--------------------------------------------------------------------------------------------------------------------------------------------------------------------------------------|----|----|---------------------------------------------|
|    | <p>Trazodone</p> <p>Salmeterol</p> <p>Tolazamide</p> <p><i>Propranolol</i></p> <p><i>Lomefloxacin</i></p>                                                                            |    |    |                                             |
| 32 | <p>Carteolol</p> <p>Dicloxacillin</p> <p>Saquinavir</p> <p>Olmesartan medoxomil</p> <p><i>Zomepirac</i></p> <p><i>Atenolol</i></p> <p><i>Cefuroxime</i></p> <p><i>Gliclazide</i></p> | 57 | 42 | <p>1 KEGG</p> <p>0 GO BP</p> <p>1 GO CC</p> |
| 33 | <p>Spirolactone</p> <p>Amoxapine</p> <p>Quinapril</p> <p>Metolazone</p> <p>Propofol</p> <p><i>Azelastine</i></p> <p><i>Acetaminophen</i></p> <p><i>Imipramine</i></p>                | 60 | 76 | <p>4 KEGG</p> <p>0 GO BP</p> <p>0 GO CC</p> |
| 34 | <p>Sildenafil</p> <p>Tamoxifen</p> <p>Mebendazole</p> <p>Gatifloxacin</p>                                                                                                            | 63 | 66 | <p>5 KEGG</p> <p>8 GO BP</p> <p>2 GO CC</p> |

|    |                                                                                                                                                                                                    |    |    |                                             |
|----|----------------------------------------------------------------------------------------------------------------------------------------------------------------------------------------------------|----|----|---------------------------------------------|
|    | <p>Imatinib</p> <p><i>Clotrimazole</i></p> <p><i>Nabumetone</i></p> <p><i>Loratadine</i></p>                                                                                                       |    |    |                                             |
| 35 | <p>Flecainide</p> <p>Chlorpromazine</p> <p>Trimipramine</p> <p>Clozapine</p> <p><i>Sulfamethizole</i></p> <p><i>Piperacillin</i></p> <p><i>Propylthiouracil</i></p> <p><i>Sulfamethoxazole</i></p> | 63 | 79 | <p>0 KEGG</p> <p>2 GO BP</p> <p>3 GO CC</p> |



## REFERENCES

- (1) Lv, X.; Kong, J.; Chen, W.-D.; Wang, Y.-D. The Role of the Apelin/APJ System in the Regulation of Liver Disease. *Front. Pharmacol.* **2017**, *8*, 221. <https://doi.org/10.3389/fphar.2017.00221>.
- (2) Dharmalingam, M.; Yamasandhi, Pg. Nonalcoholic Fatty Liver Disease and Type 2 Diabetes Mellitus. *Indian J. Endocrinol. Metab.* **2018**, *22* (3), 421. [https://doi.org/10.4103/ijem.IJEM\\_585\\_17](https://doi.org/10.4103/ijem.IJEM_585_17).
- (3) Asadipooya, K.; Lankarani, K. B.; Raj, R.; Kalantarhormozi, M. RAGE Is a Potential Cause of Onset and Progression of Nonalcoholic Fatty Liver Disease. *Int. J. Endocrinol.* **2019**, *2019*, 1–11. <https://doi.org/10.1155/2019/2151302>.
- (4) Malhotra, P.; Gill, R. K.; Saksena, S.; Alrefai, W. A. Disturbances in Cholesterol Homeostasis and Non-Alcoholic Fatty Liver Diseases. *Front. Med.* **2020**, *7*, 467. <https://doi.org/10.3389/fmed.2020.00467>.
- (5) Simonen, P.; Kotronen, A.; Hallikainen, M.; Sevastianova, K.; Makkonen, J.; Hakkarainen, A.; Lundbom, N.; Miettinen, T. A.; Gylling, H.; Yki-Järvinen, H. Cholesterol Synthesis Is Increased and Absorption Decreased in Non-Alcoholic Fatty Liver Disease Independent of Obesity. *J. Hepatol.* **2011**, *54* (1), 153–159. <https://doi.org/10.1016/j.jhep.2010.05.037>.
- (6) Ju, C.; Colgan, S. P.; Eltzschig, H. K. Hypoxia-Inducible Factors as Molecular Targets for Liver Diseases. *J. Mol. Med.* **2016**, *94* (6), 613–627. <https://doi.org/10.1007/s00109-016-1408-1>.
- (7) Chu, Q.; Gu, X.; Zheng, Q.; Zhu, H. Regulatory Mechanism of HIF-1 $\alpha$  and Its Role in Liver Diseases: A Narrative Review. *Ann. Transl. Med.* **2022**, *10* (2), 109–109. <https://doi.org/10.21037/atm-21-4222>.
- (8) Miller, T. J.; Knapton, A.; Adeyemo, O.; Noory, L.; Weaver, J.; Hanig, J. P. Cytochrome c: A Non-Invasive Biomarker of Drug-Induced Liver Injury. *J. Appl. Toxicol.* **2008**, *28* (7), 815–828. <https://doi.org/10.1002/jat.1347>.
- (9) Mercado-Gómez, M.; Lopitz-Otsoa, F.; Azkargorta, M.; Serrano-Maciá, M.; Lachiondo-Ortega, S.; Goikoetxea-Usandizaga, N.; Rodríguez-Agudo, R.; Fernández-Ramos, D.; Bizkarguenaga, M.; Juan, V. G.; Lectez, B.; Aloria, K.; Arizmendi, J. M.; Simon, J.; Alonso, C.; Lozano, J. J.; Avila, M. A.; Banales, J. M.; Marin, J. J. G.; Beraza, N.; Mato, J. M.; Elortza, F.; Barrio, R.; Sutherland, J. D.; Mayor,

- U.; Martínez-Chantar, M. L.; Delgado, T. C. Multi-Omics Integration Highlights the Role of Ubiquitination in CCl<sub>4</sub>-Induced Liver Fibrosis. *Int. J. Mol. Sci.* **2020**, *21* (23), 9043. <https://doi.org/10.3390/ijms21239043>.
- (10) Park, J.-S.; Ma, H.; Roh, Y.-S. Ubiquitin Pathways Regulate the Pathogenesis of Chronic Liver Disease. *Biochem. Pharmacol.* **2021**, *193*, 114764. <https://doi.org/10.1016/j.bcp.2021.114764>.
- (11) Tang, Y.; Bian, Z.; Zhao, L.; Liu, Y.; Liang, S.; Wang, Q.; Han, X.; Peng, Y.; Chen, X.; Shen, L.; Qiu, D.; Li, Z.; Ma, X. Interleukin-17 Exacerbates Hepatic Steatosis and Inflammation in Non-Alcoholic Fatty Liver Disease. *Clin. Exp. Immunol.* **2011**, *166* (2), 281–290. <https://doi.org/10.1111/j.1365-2249.2011.04471.x>.
- (12) Adams, D. H.; Ju, C.; Ramaiah, S. K.; Uetrecht, J.; Jaeschke, H. Mechanisms of Immune-Mediated Liver Injury. *Toxicol. Sci.* **2010**, *115* (2), 307–321. <https://doi.org/10.1093/toxsci/kfq009>.
- (13) Monin, L.; Gaffen, S. L. Interleukin 17 Family Cytokines: Signaling Mechanisms, Biological Activities, and Therapeutic Implications. *Cold Spring Harb. Perspect. Biol.* **2018**, *10* (4), a028522. <https://doi.org/10.1101/cshperspect.a028522>.
- (14) Elsharkawy, A. M.; Mann, D. A. Nuclear Factor-KB and the Hepatic Inflammation-Fibrosis-Cancer Axis. *Hepatology* **2007**, *46* (2), 590–597. <https://doi.org/10.1002/hep.21802>.
- (15) Berasain, C.; Avila, M. A. The EGFR Signalling System in the Liver: From Hepatoprotection to Hepatocarcinogenesis. *J. Gastroenterol.* **2014**, *49* (1), 9–23. <https://doi.org/10.1007/s00535-013-0907-x>.
- (16) Wen, Y.; Lambrecht, J.; Ju, C.; Tacke, F. Hepatic Macrophages in Liver Homeostasis and Diseases-Diversity, Plasticity and Therapeutic Opportunities. *Cell. Mol. Immunol.* **2021**, *18* (1), 45–56. <https://doi.org/10.1038/s41423-020-00558-8>.
- (17) Tahmasebi-Birgani, M.; Ansari, H.; Carloni, V. Defective Mitosis-Linked DNA Damage Response and Chromosomal Instability in Liver Cancer. *Biochimica et Biophysica Acta (BBA) - Reviews on Cancer* **2019**, *1872* (1), 60–65. <https://doi.org/10.1016/j.bbcan.2019.05.008>.
- (18) Lee, S. H. Hyperoxia Accelerates Progression of Hepatic Fibrosis by Up-Regulation of Transforming Growth Factor- $\beta$  Expression. *WJG* **2014**, *20* (11), 3011. <https://doi.org/10.3748/wjg.v20.i11.3011>.
- (19) Böhm, F.; Köhler, U. A.; Speicher, T.; Werner, S. Regulation of Liver Regeneration by Growth Factors and Cytokines. *EMBO Mol Med* **2010**, *2* (8), 294–305.

<https://doi.org/10.1002/emmm.201000085>.

- (20) Baghy, K. Proteoglycans in Liver Cancer. *World J. Gastroenterol.* 2016, 22 (1), 379. <https://doi.org/10.3748/wjg.v22.i1.379>.
- (21) Herrera, J.; Henke, C. A.; Bitterman, P. B. Extracellular Matrix as a Driver of Progressive Fibrosis. *J. Clin. Invest.* 2018, 128 (1), 45–53. <https://doi.org/10.1172/JCI93557>.
- (22) Hintermann; Christen. The Many Roles of Cell Adhesion Molecules in Hepatic Fibrosis. *Cells* 2019, 8 (12), 1503. <https://doi.org/10.3390/cells8121503>.
- (23) Boettner, B.; Van Aelst, L. Control of Cell Adhesion Dynamics by Rap1 Signaling. *Curr. Opin. Cell Biol.* 2009, 21 (5), 684–693. <https://doi.org/10.1016/j.ceb.2009.06.004>.
- (24) Wang, Y.; Nakajima, T.; Gonzalez, F. J.; Tanaka, N. PPARs as Metabolic Regulators in the Liver: Lessons from Liver-Specific PPAR-Null Mice. *Int. J. Mol. Sci.* 2020, 21 (6), 2061. <https://doi.org/10.3390/ijms21062061>.
- (25) Schulze-Osthoff, K.; Ferrari, D.; Riehemann, K.; Wesselborg, S. Regulation of NF-KB Activation by MAP Kinase Cascades. *Immunobiology* 1997, 198 (1–3), 35–49. [https://doi.org/10.1016/S0171-2985\(97\)80025-3](https://doi.org/10.1016/S0171-2985(97)80025-3).
- (26) Coffin, C. S.; Fraser, H. F.; Panaccione, R.; Ghosh, S. Liver Diseases Associated with Anti-Tumor Necrosis Factor-Alpha (TNF- $\alpha$ ) Use for Inflammatory Bowel Disease: *Inflamm. Bowel Dis.* 2011, 17 (1), 479–484. <https://doi.org/10.1002/ibd.21336>.
- (27) Calcagno, D. M.; Chu, A.; Gaul, S.; Taghdiri, N.; Toomu, A.; Leszczynska, A.; Kaufmann, B.; Papouchado, B.; Wree, A.; Geisler, L.; Hoffman, H. M.; Feldstein, A. E.; King, K. R. NOD-like Receptor Protein 3 Activation Causes Spontaneous Inflammation and Fibrosis That Mimics Human NASH. *Hepatology* 2022, 76 (3), 727–741. <https://doi.org/10.1002/hep.32320>.
- (28) Zhong, Y.; Kinio, A.; Saleh, M. Functions of NOD-Like Receptors in Human Diseases. *Front. Immunol.* 2013, 4. <https://doi.org/10.3389/fimmu.2013.00333>.
- (29) Schierwagen, R.; Uschner, F. E.; Ortiz, C.; Torres, S.; Brol, M. J.; Tyc, O.; Gu, W.; Grimm, C.; Zeuzem, S.; Plamper, A.; Pfeifer, P.; Zimmer, S.; Welsch, C.; Schaefer, L.; Rheinwald, K. P.; Clària, J.; Arroyo, V.; Trebicka, J.; Klein, S. The Role of Macrophage-Inducible C-Type Lectin in Different Stages of Chronic Liver Disease. *Front. Immunol.* 2020, 11, 1352. <https://doi.org/10.3389/fimmu.2020.01352>.
- (30) Liu, X.; Green, R. M. Endoplasmic Reticulum Stress and Liver Diseases. *Liver Res.* 2019, 3 (1), 55–64. <https://doi.org/10.1016/j.livres.2019.01.002>.
- (31) Adams, J.; Jafar-Nejad, H. The Roles of Notch Signaling in Liver Development

and Disease. *Biomolecules* 2019, 9 (10), 608. <https://doi.org/10.3390/biom9100608>.

(32) Chiu, D. K.-C. Hypoxia Regulates the Mitochondrial Activity of Hepatocellular Carcinoma Cells through HIF/HEY1/PINK1 Pathway. 2019, 16.

(33) Bhogal, R. H.; Curbishley, S. M.; Weston, C. J.; Adams, D. H.; Afford, S. C. Reactive Oxygen Species Mediate Human Hepatocyte Injury during Hypoxia/Reoxygenation. *Liver Transpl.* 2010, 16 (11), 1303–1313. <https://doi.org/10.1002/lt.22157>.

(34) Cui, X.; Zhang, X.; Yin, Q.; Meng, A.; Su, S.; Jing, X.; Li, H.; Guan, X.; Li, X.; Liu, S.; Cheng, M. F-Actin Cytoskeleton Reorganization Is Associated with Hepatic Stellate Cell Activation. *Mol. Med. Rep.* 2014, 9 (5), 1641–1647. <https://doi.org/10.3892/mmr.2014.2036>.

(35) Desouza, M.; Gunning, P. W.; Stehn, J. R. The Actin Cytoskeleton as a Sensor and Mediator of Apoptosis. *BioArchitecture* 2012, 2 (3), 75–87. <https://doi.org/10.4161/bioa.20975>.

(36) Mimche, P. N.; Brady, L. M.; Bray, C. F.; Lee, C. M.; Thapa, M.; King, T. P.; Quicke, K.; McDermott, C. D.; Mimche, S. M.; Grakoui, A.; Morgan, E. T.; Lamb, T. J. The Receptor Tyrosine Kinase EphB2 Promotes Hepatic Fibrosis in Mice. *Hepatology* 2015, 62 (3), 900–914. <https://doi.org/10.1002/hep.27792>.

(37) Mimche, P. N. EphB2 Receptor Tyrosine Kinase Promotes Hepatic Fibrogenesis in Mice via Activation of Hepatic Stellate Cells. *Sci. Rep.* 2018, 14.
